# Supplementary material for: The STRATAA study protocol: a programme to assess the burden of enteric fever in Bangladesh, Malawi and Nepal using prospective population census, passive surveillance, serological studies and healthcare utilisation surveys
Source: PubMed Central journal article supplement (PMC5726077; doi:10.1136/bmjopen-2017-016283), 2017-07-02
Supplement: bmjopen-2017-016283.draft_revisions.pdf [file bmjopen-2017-016283.draft_revisions.pdf]

# BMJ Open

## THE STRATAA STUDY PROTOCOL: A PROGRAMME TO ASSESS THE BURDEN OF ENTERIC FEVER IN BANGLADESH, MALAWI AND NEPAL USING PROSPECTIVE POPULATION CENSUS, PASSIVE SURVEILLANCE, SEROLOGICAL STUDIES AND HEALTHCARE UTILISATION SURVEYS

|                               |                                                                                                                                                                                                                                                                                                                                                                                                                                                                                                                                                                                                                                                                                                                                                                                                                                                                                                                                                                                                                                                                                                                                                                                                                                                                                                                                                                                                                                                                                                                                                                                                                                                                                                                                                                                                                                                                                                                                                                                                                                                                                                                                                                                                                                                                                                                                                        |
|-------------------------------|--------------------------------------------------------------------------------------------------------------------------------------------------------------------------------------------------------------------------------------------------------------------------------------------------------------------------------------------------------------------------------------------------------------------------------------------------------------------------------------------------------------------------------------------------------------------------------------------------------------------------------------------------------------------------------------------------------------------------------------------------------------------------------------------------------------------------------------------------------------------------------------------------------------------------------------------------------------------------------------------------------------------------------------------------------------------------------------------------------------------------------------------------------------------------------------------------------------------------------------------------------------------------------------------------------------------------------------------------------------------------------------------------------------------------------------------------------------------------------------------------------------------------------------------------------------------------------------------------------------------------------------------------------------------------------------------------------------------------------------------------------------------------------------------------------------------------------------------------------------------------------------------------------------------------------------------------------------------------------------------------------------------------------------------------------------------------------------------------------------------------------------------------------------------------------------------------------------------------------------------------------------------------------------------------------------------------------------------------------|
| Journal:                      | <i>BMJ Open</i>                                                                                                                                                                                                                                                                                                                                                                                                                                                                                                                                                                                                                                                                                                                                                                                                                                                                                                                                                                                                                                                                                                                                                                                                                                                                                                                                                                                                                                                                                                                                                                                                                                                                                                                                                                                                                                                                                                                                                                                                                                                                                                                                                                                                                                                                                                                                        |
| Manuscript ID                 | bmjopen-2017-016283                                                                                                                                                                                                                                                                                                                                                                                                                                                                                                                                                                                                                                                                                                                                                                                                                                                                                                                                                                                                                                                                                                                                                                                                                                                                                                                                                                                                                                                                                                                                                                                                                                                                                                                                                                                                                                                                                                                                                                                                                                                                                                                                                                                                                                                                                                                                    |
| Article Type:                 | Protocol                                                                                                                                                                                                                                                                                                                                                                                                                                                                                                                                                                                                                                                                                                                                                                                                                                                                                                                                                                                                                                                                                                                                                                                                                                                                                                                                                                                                                                                                                                                                                                                                                                                                                                                                                                                                                                                                                                                                                                                                                                                                                                                                                                                                                                                                                                                                               |
| Date Submitted by the Author: | 04-Feb-2017                                                                                                                                                                                                                                                                                                                                                                                                                                                                                                                                                                                                                                                                                                                                                                                                                                                                                                                                                                                                                                                                                                                                                                                                                                                                                                                                                                                                                                                                                                                                                                                                                                                                                                                                                                                                                                                                                                                                                                                                                                                                                                                                                                                                                                                                                                                                            |
| Complete List of Authors:     | <p>Darton, Thomas; Oxford University Clinical Research Unit; University of Sheffield Department of Infection and Immunity</p> <p>Meiring, James; University of Oxford, Oxford Vaccine Group, Paediatrics</p> <p>Tonks, Susan; Oxford Vaccine Group, Department of Paediatrics</p> <p>Khan, Md Arifuzzaman; International Centre for Diarrhoeal Disease Research</p> <p>Shakya, Mila; Patan Academy of Health Sciences, Oxford University Clinical Research Unit</p> <p>Thindwa, Deus; University of Malawi College of Medicine, Malawi Liverpool Wellcome Trust Clinical Research Programme</p> <p>Baker, Stephen; Oxford University Clinical Research Unit, The Hospital for Tropical Diseases, Wellcome Trust Major Overseas Programme; Nuffield Department of Clinical Medicine, Centre for Tropical Medicine and Global Health</p> <p>Basnyat, Buddha; Patan Academy of Health Sciences, Oxford University Clinical Research Unit; Nuffield Department of Clinical Medicine, Centre for Tropical Medicine and Global Health</p> <p>Clemens, John; International Centre for Diarrhoeal Disease Research; University of California Los Angeles Jonathan and Karin Fielding School of Public Health</p> <p>Dougan, Gordon; Wellcome Trust Sanger Institute</p> <p>Dolecek, Christiane; Mahidol University, Mahidol-Oxford Tropical Medicine Research Unit, Faculty of Tropical Medicine; Nuffield Department of Clinical Medicine, Centre for Tropical Medicine and Global Health</p> <p>Dunstan, Sarah; University of Melbourne, The Peter Doherty Institute for Infection and Immunity</p> <p>Gordon, Melita; University of Malawi College of Medicine, Malawi Liverpool Wellcome Trust Clinical Research Programme; University of Liverpool, Institute of Infection and Global Health</p> <p>Heyderman, Robert; University College London, Division of Infection and Immunity; University of Malawi College of Medicine, Malawi Liverpool Wellcome Trust Clinical Research Programme</p> <p>Holt, Kathryn; University of Melbourne, Centre for Systems Genomics; University of Melbourne, Department of Biochemistry and Molecular Biology</p> <p>Pitzer, Virginia E.; Yale Univ, Department of Epidemiology of Microbial Diseases, Yale School of Public Health</p> <p>Qadri, Firdausi ; International Centre for Diarrhoeal Disease Research</p> |

1  
2  
3  
4  
5  
6  
7  
8  
9  
10  
11  
12  
13  
14  
15  
16  
17  
18  
19  
20  
21  
22  
23  
24  
25  
26  
27  
28  
29  
30  
31  
32  
33  
34  
35  
36  
37  
38  
39  
40  
41  
42  
43  
44  
45  
46  
47  
48  
49  
50  
51  
52  
53  
54  
55  
56  
57  
58  
59  
60

|                                                    |                                                                                                                                                                                        |
|----------------------------------------------------|----------------------------------------------------------------------------------------------------------------------------------------------------------------------------------------|
|                                                    | Zaman, K; International Centre for Diarrhoeal Disease Research, Bangladesh (icddr,b), Centre for Equity and Health Systems<br>Pollard, Andrew; University of Oxford, Paediatrics       |
| <b>&lt;b&gt;Primary Subject Heading&lt;/b&gt;:</b> | Infectious diseases                                                                                                                                                                    |
| <b>Secondary Subject Heading:</b>                  | Epidemiology, Global health, Diagnostics                                                                                                                                               |
| <b>Keywords:</b>                                   | Diagnostic microbiology < INFECTIOUS DISEASES, Epidemiology < INFECTIOUS DISEASES, Paediatric infectious disease & immunisation < PAEDIATRICS, Tropical medicine < INFECTIOUS DISEASES |
|                                                    |                                                                                                                                                                                        |

SCHOLARONE™  
Manuscripts

For peer review only

1  
2  
3  
4  
5  
6  
7  
8  
9  
10  
11  
12  
13  
14  
15  
16  
17  
18  
19  
20  
21  
22  
23  
24  
25  
26  
27  
28  
29  
30  
31  
32  
33  
34  
35  
36  
37  
38  
39  
40  
41  
42  
43  
44  
45  
46  
47  
48  
49  
50  
51  
52  
53  
54  
55  
56  
57  
58  
59  
60

1           **THE STRATAA STUDY PROTOCOL: A PROGRAMME TO ASSESS THE**  
2           **BURDEN OF ENTERIC FEVER IN BANGLADESH, MALAWI AND NEPAL USING**  
3           **PROSPECTIVE POPULATION CENSUS, PASSIVE SURVEILLANCE,**  
4           **SEROLOGICAL STUDIES AND HEALTHCARE UTILISATION SURVEYS**

6           **Short title: The STRATAA study**

7           **Authors:** Thomas C. Darton,<sup>1,2,3,\*</sup> James E. Meiring,<sup>2,\*†</sup> Susan Tonks,<sup>2</sup> Md  
8           Arifuzzaman Khan,<sup>4</sup> Mila Shakya,<sup>5</sup> Deus Thindwa,<sup>6</sup> Stephen Baker,<sup>1,7,8</sup> Buddha  
9           Basnyat,<sup>5,7</sup> John D. Clemens,<sup>4,9</sup> Gordon Dougan,<sup>8</sup> Christiane Dolecek,<sup>7, 10</sup> Sarah J.  
10          Dunstan,<sup>11</sup> Melita A. Gordon,<sup>6,12</sup> Robert S. Heyderman,<sup>6,13</sup> Kathryn E. Holt,<sup>14,15</sup>  
11          Virginia E. Pitzer,<sup>16</sup> Firdausi Qadri,<sup>4</sup> K. Zaman,<sup>4</sup> and Andrew J. Pollard,<sup>2</sup> on behalf of  
12          the STRATAA Study Consortium

13          **Affiliations:**

- 14           1. The Hospital for Tropical Diseases, Wellcome Trust Major Overseas  
15           Programme, Oxford University Clinical Research Unit, Ho Chi Minh City,  
16           Vietnam;
- 17           2. Oxford Vaccine Group, Department of Paediatrics, University of Oxford, and  
18           the NIHR Oxford Biomedical Research Centre, Oxford, United Kingdom;
- 19           3. Department of Infection, Immunity and Cardiovascular Disease, University of  
20           Sheffield Medical School, United Kingdom;
- 21           4. International Centre for Diarrhoeal Diseases Research, Bangladesh (icDDR,b),  
22           Dhaka, Bangladesh;
- 23           5. Oxford University Clinical Research Unit, Patan Academy of Health Sciences,  
24           Kathmandu, Nepal;
- 25           6. Malawi Liverpool Wellcome Trust Clinical Research Programme, University of  
26           Malawi College of Medicine, Blantyre, Malawi;
- 27           7. Centre for Tropical Medicine and Global Health, Nuffield Department of  
28           Medicine, University of Oxford, United Kingdom;

- 1  
2  
3 29 8. The Wellcome Trust Sanger Institute, Hinxton, Cambridgeshire, United  
4  
5 30 Kingdom;  
6  
7 31 9. UCLA Fielding School of Public Health, Los Angeles, United States of  
8  
9 32 America;  
10  
11 33 10. Mahidol-Oxford Tropical Medicine Research Unit, Faculty of Tropical  
12  
13 34 Medicine, Mahidol University, Bangkok, Thailand;  
14  
15 35 11. The Peter Doherty Institute for Infection and Immunity, The University of  
16  
17 36 Melbourne, Melbourne, Australia;  
18  
19 37 12. Institute of Infection and Global Health, University of Liverpool, Liverpool,  
20  
21 38 United Kingdom;  
22  
23 39 13. Division of Infection and Immunity, University College London, London,  
24  
25 40 United Kingdom;  
26  
27 41 14. Centre for Systems Genomics, University of Melbourne, Parkville, Victoria,  
28  
29 42 Australia;  
30  
31 43 15. Department of Biochemistry and Molecular Biology, University of Melbourne,  
32  
33 44 Parkville, Victoria, Australia;  
34  
35 45 16. Department of Epidemiology of Microbial Diseases, Yale School of Public  
36  
37 46 Health, Yale University, New Haven, Connecticut, United States of America  
38  
39 47  
40  
41 48 \* Contributed equally  
42  
43 49 **Corresponding Author:** Dr James Meiring, Oxford Vaccine Group, Department of  
44  
45 50 Paediatrics, University of Oxford, and the NIHR Oxford Biomedical Research Centre,  
46  
47 51 Oxford, United Kingdom.  
48  
49 52 Email: james.meiring@paediatrics.ox.ac.uk  
50  
51 53 **Consortium members:**  
52  
53 54 Abhilasha Karkey, Sabina Dongol, Amit Aryjal (Oxford University Clinical Research  
54  
55 55 Unit, Patan Academy of Health Sciences, Kathmandu, Nepal);  
56  
57  
58  
59  
60

1  
2  
3 56 Farhana Khanam, Nirod Chandra Saha (International Center for Diarrhoeal Diseases  
4  
5 57 Research, Dhaka, Bangladesh)  
6  
7 58 Tikhala Makhaza Jere, Chisomo Msefula, Tonney Nyirenda (University of Liverpool,  
8  
9 59 United Kingdom and the Malawi Liverpool Wellcome Trust Clinical Research  
10  
11 60 Programme, Malawi)  
12  
13 61 Tan Trinh Van (The Hospital for Tropical Diseases, Wellcome Trust Major Overseas  
14  
15 62 Programme, Oxford University Clinical Research Unit, Ho Chi Minh City, Vietnam)  
16  
17 63 Stephen Reece (Wellcome Trust Sanger Institute, Cambridge, United Kingdom)  
18  
19 64 Merryn Voysey, Christoph J. Blohmke, Yama Farooq, Jennifer Hill  
20  
21 65 (Oxford Vaccine Group, Department of Paediatrics, University of Oxford, and the  
22  
23 66 NIHR Oxford Biomedical Research Centre, Oxford, United Kingdom)  
24  
25 67 Neil J. Saad (Yale School of Public Health, Yale University, New Haven, Connecticut,  
26  
27 68 United States of America)  
28  
29 69  
30  
31  
32  
33  
34  
35  
36  
37  
38  
39  
40  
41  
42  
43  
44  
45  
46  
47  
48  
49  
50  
51  
52  
53  
54  
55  
56  
57  
58  
59  
60

1  
2  
3 70 **ABSTRACT**  
4

5 71 **Introduction**  
6

7 72 Invasive infections caused by *Salmonella enterica* serovar Typhi and Paratyphi A are  
8  
9 73 estimated to account for 12-27 million febrile illness episodes worldwide annually.  
10

11 74 Determining the true burden of typhoidal *Salmonellae* infections is hindered by lack  
12  
13 75 of population-based studies and adequate laboratory diagnostics.  
14

15 76 The STRATAA (Strategic Typhoid alliance across Africa and Asia) study takes a  
16  
17 77 systematic approach to measuring the age-stratified burden of clinical and subclinical  
18  
19 78 disease caused by typhoidal *Salmonellae* infections at three high-incidence urban  
20  
21 79 sites in Africa and Asia. We aim to explore the natural history of *Salmonella*  
22  
23 80 transmission in endemic settings, addressing key uncertainties relating to the  
24  
25 81 epidemiology of enteric fever identified through mathematical models, and enabling  
26  
27 82 optimisation of vaccine strategies.  
28

29 83 **Methods/Design**  
30

31 84 Using census-defined denominator populations of  $\geq 100,000$  individuals at sites in  
32  
33 85 Malawi, Bangladesh and Nepal, the primary outcome is to characterize the burden of  
34  
35 86 enteric fever in these populations over a 24-month period. During passive  
36  
37 87 surveillance, clinical and household data, and laboratory samples will be collected  
38  
39 88 from febrile individuals. In parallel, healthcare utilization and water, sanitation and  
40  
41 89 hygiene surveys will be performed to characterise healthcare-seeking behaviour and  
42  
43 90 assess potential routes of transmission. The rates of both undiagnosed and  
44  
45 91 subclinical exposure to typhoidal *Salmonellae* (seroincidence), identification of  
46  
47 92 chronic carriage, and population seroprevalence of typhoid infection will be assessed  
48  
49 93 through, age-stratified serosurveys performed at each site. Secondary attack rates  
50  
51 94 will be estimated among household contacts of acute enteric fever cases and  
52  
53 95 possible chronic carriers.  
54

55  
56 96 **Discussion**  
57  
58  
59  
60

1  
2  
3 97 With this network of field-sites, laboratories and clinical investigators, the  
4  
5 98 STRATAA study will address the current gaps in our knowledge regarding the  
6  
7 99 epidemiology of typhoidal *Salmonellae* in endemic regions. These data used in  
8  
9 100 conjunction with mathematical models, will be a timely precursor to the design  
10  
11 101 and instigation of comprehensive enteric fever control programmes through the  
12  
13 102 optimal deployment of new generation enteric fever vaccines.  
14

15  
16  
17

#### 18 **STRENGTHS AND LIMITATIONS**

19 105 - Through the use of recent dynamic typhoid transmission mathematical models,  
20  
21 106 specific data gaps have been identified which this protocol design aims to directly  
22  
23 107 address.

24  
25 108 - We have designed a comprehensive multicomponent epidemiological approach,  
26  
27 109 nesting passive surveillance, serosurveillance and healthcare utilisation surveys  
28  
29 110 within a demographic census population, to accurately determine the age-stratified  
30  
31 111 burden of enteric fever.

32  
33 112 - This programme utilises key field sites in Africa and Asia encompassing a range of  
34  
35 113 differing epidemiological settings, whilst also supporting the development of local  
36  
37 114 research infrastructure and international collaboration.

38  
39 115 - This programme combines traditional epidemiological methods with cutting-  
40  
41 116 edge laboratory methods for the diagnosis of febrile illness and investigation of the  
42  
43 117 host and pathogen genetics and antimicrobial resistance determinants.

44  
45 118 - With a study of this size ensuring implementation of standardised clinical  
46  
47 119 definitions, data collection and sample processing is challenging.

48  
49 120 - Practical limitations include the sharing and standardisation of clinical definitions,  
50  
51 121 data and sample collection methods and laboratory assays, based on the facilities  
52  
53 122 and staff available and community requirements at each site.

54  
55 123 - The number of field-sites included in this current protocol is limited to three; all of  
56  
57 124 these sites are densely populated urban settings with likely high-incidence of enteric  
58  
59  
60

1  
2  
3 125 fever transmission. The degree to which our data may be extrapolated to other  
4  
5 126 settings and countries remains to be explored.  
6  
7 127 - Enteric fever epidemiology is in a constant state of flux due to factors including  
8  
9 128 population movement, alterations to water and sanitation provision and seasonal  
10  
11 129 variation. How these factors may play a role in accurately measuring the burden of  
12  
13 130 enteric fever over a two-year study period provides some uncertainty to sample size  
14  
15 131 estimates and data collection procedures.  
16  
17  
18  
19

20 133 **Registration:** ISRCTN 12131979

21 134 **Ethics References:** Oxford (Oxford Tropical Research Ethics Committee 39-15)

22  
23 135 Bangladesh (icddr,b Institutional Review Board PR-15119 )

24  
25 136 Malawi (National Health Sciences Research Committee

26  
27 137 15/5/1599)

28  
29 138 Nepal (Nepal Health Research Council 306/2015)

30  
31  
32 139

33 140 **Keywords:**

34  
35 141 Enteric fever, vaccination programme, infection transmission, *Salmonella* Typhi,

36  
37 142 *Salmonella* Paratyphi A, serosurveillance, seroepidemiology, healthcare utilisation,

38  
39 143 resource-limited settings; diagnosis; febrile illness; Africa, Asia.  
40  
41  
42  
43  
44  
45  
46  
47  
48  
49  
50  
51  
52  
53  
54  
55  
56  
57  
58  
59  
60



1  
2  
3 144 **BACKGROUND**

4  
5 145 *Salmonella enterica* serovars Typhi (S. Typhi) and Paratyphi A (S. Paratyphi A), are  
6  
7 146 human-restricted pathogens transmitted by faeco-oral ingestion. The ensuing  
8  
9 147 disease, enteric fever (or 'typhoid fever'), is a non-specific febrile illness which affects  
10  
11 148 an estimated 12-27 million people worldwide each year, resulting in 129,000–  
12  
13 149 223,000 deaths.<sup>1–3</sup> Despite a dramatic reduction in incidence over the last century in  
14  
15 150 most high-income countries, continuing inadequate access to clean water and  
16  
17 151 increasing inter-continental spread of multiply antibiotic-resistant strains hamper  
18  
19 152 disease control efforts especially in resource-limited settings.<sup>3–5</sup> The current burden  
20  
21 153 of disease is highest among children and young adults in South and Southeast Asia<sup>1–</sup>  
22  
23 154 <sup>3</sup> but is increasingly recognized in sub-Saharan Africa.<sup>6</sup>

24  
25 155  
26  
27 156 Recently, a new generation of Vi- conjugate enteric fever vaccines, suitable for use in  
28  
29 157 infants and providing longer lasting protection than those previously licensed,<sup>7–10</sup>  
30  
31 158 have become available. Determining how and where interventions such as  
32  
33 159 vaccination may be best deployed is difficult due to a lack of population-based  
34  
35 160 incidence studies and inaccurate diagnostic tests.<sup>1–3</sup> Improving disease burden  
36  
37 161 estimates and providing data on the epidemiology and transmission of S. Typhi and  
38  
39 162 S. Paratyphi A to inform mathematical models<sup>11–13</sup> could improve the evidence  
40  
41 163 necessary to design comprehensive and effective disease control programmes.<sup>14</sup>

42  
43 164  
44  
45 165 **Burden of disease and diagnostics**

46  
47 166 Recent meta-analyses examining global causes of morbidity and mortality estimate  
48  
49 167 that a significant burden of disease worldwide, and especially in South and  
50  
51 168 Southeast Asia, may be attributed to enteric fever.<sup>15–17</sup> The margin of error on these  
52  
53 169 estimates is wide, however; much of the uncertainty regarding the burden of disease  
54  
55 170 caused by typhoidal *Salmonella* is due to the unavailability of accurate diagnostics or  
56  
57 171 misclassification of non-specific disease presentations, in addition to a general lack

1  
2  
3 172 of data.<sup>18</sup> Availability of antibiotics from local pharmacies without prescription,  
4  
5 173 frequent misdiagnosis as malaria, dengue or other febrile illnesses, or the avoidance  
6  
7 174 of hospital due to fear or expense are all likely to result in an underestimate of the  
8  
9 175 true numbers of cases.<sup>19</sup> In contrast, the widespread use of suboptimal diagnostic  
10  
11 176 tests such as the Widal test in areas where exposure to similar bacteria in the  
12  
13 177 environment occurs may lead to inaccurate over-diagnosis of the condition.<sup>20</sup>  
14  
15 178 Previous studies and systematic reviews have attempted to address this inaccuracy  
16  
17 179 by calculating the imprecision associated with insensitive blood culture methods, and  
18  
19 180 applying this correction to blood culture confirmed case numbers.<sup>1,2</sup>  
20  
21 181  
22  
23 182 In addition to a better understanding of the disease burden attributable to typhoidal  
24  
25 183 *Salmonellae*, improved diagnostics and biomarkers are required to improve individual  
26  
27 184 case management.<sup>21</sup> The current gold-standard diagnostic test for  
28  
29 185 typhoid/paratyphoid is blood culture; while this test provides the causative isolate,  
30  
31 186 thereby allowing susceptibility testing and further typing methods to be performed,  
32  
33 187 most laboratories in resource-limited settings lack the infrastructure to perform these  
34  
35 188 assays. Even in ideal conditions, blood culture requires a significant volume of blood  
36  
37 189 to enhance diagnostic yield, and is relatively insensitive even in highly-controlled  
38  
39 190 human challenge settings where sensitivity reaches 80%.<sup>22</sup> Highly sensitive and  
40  
41 191 specific diagnostic tests are a fundamental requirement for surveillance and vaccine  
42  
43 192 efficacy studies, however, both for measuring the number of cases  
44  
45 193 avoided/prevented, but also for reassuring policy makers and funders that vaccine  
46  
47 194 implementation is worth investment. While several rapid serological diagnostic tests  
48  
49 195 have recently been developed, these still rely on a few selected antigens, which are  
50  
51 196 known to be non-specific in endemic communities.<sup>23,24</sup> Newer diagnostic modalities  
52  
53 197 are in development, however, which have utilised serum banks from multiple  
54  
55 198 countries and samples collected from controlled human infection models to identify  
56  
57 199 putative novel antigens for serological assay and further high sensitivity approaches  
58  
59  
60

1  
2  
3 200 including metabolomics and functional genomics.<sup>5,25-27</sup> In addition, several of these  
4  
5 201 newer approaches have demonstrated potential for identifying individuals with  
6  
7 202 probable chronic carriage. Identification and treatment of chronic carriers in a  
8  
9 203 population would significantly improve our understanding of disease dynamics and  
10  
11 204 allow targeted treatment strategies to reduce community transmission of infection.  
12

13  
14  
15 206 Furthermore, whilst utilising these new diagnostic tests in comprehensive passive  
16  
17 207 surveillance or even active surveillance programmes will identify acute cases of  
18  
19 208 typhoid disease, the incidence rate of sub-clinical infection and exposure is unknown.

20  
21 209 These data are likely essential to understanding pathogen transmission as well as  
22  
23 210 the development and maintenance of immunity against clinical disease<sup>12</sup> and are  
24  
25 211 likely only to be obtainable through the use of seroepidemiological methods.

26  
27 212 Previous seroepidemiological studies have examined the cross-sectional age-  
28  
29 213 stratified prevalence of antibodies to the *S. Typhi* flagellar (H) antigen in Santiago,  
30  
31 214 Chile<sup>28</sup>, and serum bactericidal antibody in Kathmandu, Nepal.<sup>29</sup> Also, high antibody  
32  
33 215 titres to the Vi (Vi capsular polysaccharide; virulence factor) antigen of *S. Typhi*  
34  
35 216 measured by agglutination assay have been used to estimate chronic carrier  
36  
37 217 frequency in population-based studies,<sup>30-32</sup> although these studies were not  
38  
39 218 universally successful at identifying chronic carriers.<sup>33</sup> Improvements in serological  
40  
41 219 assays and the discovery of a newer generation of diagnostic antigens<sup>34</sup> suggest that  
42  
43 220 population-based serosurveillance studies, especially using longitudinal  
44  
45 221 measurements, may provide key data regarding the incidence of subclinical infection  
46  
47 222 with the bacterial agents of enteric fever and the prevalence of chronic carriers.  
48

49  
50 223

## 51 52 224 **Transmission**

53  
54 225 Closely related to the estimate of incidence is the contribution of different typhoid  
55  
56 226 states to ongoing transmission within a community. Acute cases of enteric fever,  
57  
58 227 individuals with subclinical infection, as well as chronic carriers likely all contribute to  
59  
60

1  
2  
3 228 the transmission and maintenance of *S. Typhi* and *S. Paratyphi A* in endemic areas,  
4  
5 229 but not to the same degree. This is an essential area of further research, particularly  
6  
7 230 given the negative impact transmission from chronic carriers could have on the  
8  
9 231 indirect protection afforded by typhoid vaccines.<sup>12</sup> The importance of 'short cycle'  
10  
11 232 transmission via contaminated food and water in the immediate environment versus  
12  
13 233 'long cycle' transmission via the contamination of community water sources is also  
14  
15 234 an area of direct relevance in the control of typhoid fever, primarily through non-  
16  
17 235 vaccine public health interventions including water and sanitation hygiene (WASH)  
18  
19 236 improvements.  
20

21 237

### 23 238 **Bacterial genome variation**

25 239 The enteric fever agents *S. Typhi* and *S. Paratyphi A*, while genetically distinct from  
26  
27 240 other serovars of *Salmonella enterica*, exhibit low genetic diversity and whole  
28  
29 241 genome sequence (WGS) analysis is required to uncover patterns of genetic  
30  
31 242 relatedness between isolates.<sup>35-37</sup> These techniques have been used previously to  
32  
33 243 track the development and spread of antibiotic resistance on a global scale,<sup>6</sup> and  
34  
35 244 have shown potential to accurately track transmission links between individuals,  
36  
37 245 specifically within affected households, in addition to the broader community.<sup>38</sup> One  
38  
39 246 use of this high-resolution typing previously, has been to determine whether isolates  
40  
41 247 obtained from those with acute infection are distinct from those found in chronic gall-  
42  
43 248 bladder carriers.<sup>39</sup>  
44

45 249

### 47 250 **Host susceptibility**

49 251 While environmental risk factors for enteric fever acquisition are thought to be  
50  
51 252 relatively well understood, recent evidence has emerged implicating genetic factors  
52  
53 253 in host susceptibility to infection.<sup>35,36</sup> Many early typhoid genetic susceptibility studies  
54  
55 254 reporting candidate genes were limited by small sample sizes and choice of controls,  
56  
57 255 a recent large-scale genome-wide association study however, has identified a  
58  
59  
60

1  
2  
3 256 specific locus (HLA-DRB1\*405) which confers 5-fold protection against developing  
4  
5 257 typhoid fever.<sup>35</sup> How genetic variation at this site influences protection against  
6  
7 258 typhoid is still under investigation, but may result in functional differences in MHC  
8  
9 259 class II amino acid sequences; in turn, this may influence *S. Typhi* epitope selection  
10  
11 260 and antigen presentation or the scale and format of the host's T-cell response.  
12  
13

## 14 15 262 **Vaccines**

16  
17 263 Vaccines currently available for typhoid are either oral live attenuated bacterial  
18  
19 264 strains or are derived from the *S. Typhi* polysaccharide capsule, called Vi; there are  
20  
21 265 no licensed vaccines against *S. Paratyphi A* or non-typhoidal salmonellae (NTS).  
22  
23 266 Despite recommendations for their use, these vaccines have only sparsely been  
24  
25 267 introduced in high prevalence settings.<sup>7,40</sup> The reasons for this are unclear, but likely  
26  
27 268 include failure of prioritisation and a short fall in advocacy, in addition to technical  
28  
29 269 deficiencies of the vaccines themselves. One common reason cited is the T-cell  
30  
31 270 independent nature of the immune response to the Vi polysaccharide vaccine (ViPS);  
32  
33 271 this renders the vaccine of little use in young children below the age of two years. In  
34  
35 272 addition, this feature means that the immune response does not boost, requiring  
36  
37 273 repeat vaccination to be administered every 3-5 years. As with other thymus-  
38  
39 274 independent vaccines, to overcome this problem the Vi capsule may be chemically  
40  
41 275 conjugated to a protein carrier,<sup>8</sup> as has successfully been done with conjugation of Vi  
42  
43 276 to *Pseudomonas aeruginosa* exotoxin A.<sup>9</sup> Despite demonstrating good  
44  
45 277 immunogenicity and efficacy in field trials,<sup>10,41</sup> the vaccine is still unlicensed. Newer  
46  
47 278 Vi-conjugate vaccines are in development and have progressed to assessment in  
48  
49 279 field-trials,<sup>42,43</sup> and the Oxford human typhoid challenge model.<sup>44</sup> Recent data from  
50  
51 280 the challenge models suggests that the Vi response elicited by the vaccine is high  
52  
53 281 and likely to be protective, at least in naïve healthy adult volunteers with no immunity  
54  
55 282 or those with previous history of infection.<sup>44</sup> Furthermore, a recent study in Indian  
56  
57 283 schoolchildren found a vaccine efficacy of 100% (95% confidence interval, 97.6 to  
58  
59  
60

1  
2  
3 284 100%) after a single dose of Vi conjugated to tetanus toxoid during the first year of  
4  
5 285 follow-up.<sup>43</sup>  
6

7 286  
8  
9 287 The key issue remaining, once safe, well-tolerated, immunogenic vaccines become  
10  
11 288 widely available, is how best to implement them in endemic settings. Currently  
12  
13 289 available surveillance data from most regions is insufficient to demonstrate the age-  
14  
15 290 band with the highest incidence of enteric fever.<sup>45</sup> Designing vaccination strategies to  
16  
17 291 cover the years during which children are most at risk and generating indirect  
18  
19 292 protection by preventing infection among those age groups driving transmission  
20  
21 293 could be facilitated through the use of well-informed mathematical modelling.  
22

23 294

#### 25 295 **THE STRATAA STUDY: RATIONALE AND AIMS**

27 296 The STRATAA (Strategic Typhoid alliance across Africa and Asia) study draws  
28  
29 297 together an international team of investigators, field sites, laboratories and research  
30  
31 298 institutes to address many of the key outstanding questions described above  
32  
33 299 regarding the burden of enteric fever and *Salmonella* exposure in endemic regions,  
34  
35 300 the mechanisms of susceptibility and infection transmission. These have been  
36  
37 301 identified as key uncertainties in mathematical models.<sup>11-13</sup> By conducting field  
38  
39 302 studies of the epidemiology and burden of enteric fever across three sites with  
40  
41 303 distinct epidemiological profiles and applying state-of-the-art molecular methods, the  
42  
43 304 goal of the STRATAA study is to collect the data needed to enhance our  
44  
45 305 understanding of pathogen transmission, exposure and susceptibility. These data  
46  
47 306 can then be used to rigorously parameterize and validate models for the transmission  
48  
49 307 dynamics of the agents of enteric fever, such that these models can then be used to  
50  
51 308 evaluate different vaccination strategies and, importantly, help predict the expected  
52  
53 309 impact resulting from the direct and indirect effects of vaccine introduction. These  
54  
55 310 and other overarching objectives of the STRATAA study are listed in **Table 1**.

57 311  
58  
59  
60

312 **Table 1. Overarching objectives of the STRATAA study.**

|                            |                                                                                                            |
|----------------------------|------------------------------------------------------------------------------------------------------------|
| <b>Primary</b>             | To characterise the burden of enteric fever at three urban sites in Africa and Asia                        |
| <b>Secondary</b>           | Assess the burden/incidence of enteric fever                                                               |
|                            | Assess the seroincidence of infection                                                                      |
|                            | Assess host factors affecting burden/incidence/transmission of enteric fever                               |
|                            | Assess effect of pathogen genetics on burden/incidence/transmission of enteric fever                       |
|                            | Develop diagnostic tools for rapid and consistent typhoid diagnosis                                        |
|                            | Develop transmission modelling and modelling of vaccine introduction impact                                |
| <b>Tertiary Objectives</b> | Strengthen research capacity in enteric fever endemic regions                                              |
|                            | Provide data to appropriate institutes and governments to advocate vaccine implementation                  |
|                            | To characterise the burden of invasive NTS and other invasive pathogens at an urban site in Malawi, Africa |

313

314 To deliver on these objectives, the following studies will be performed in parallel at  
315 each of the three chosen field sites, starting in May 2016 with activities continuing  
316 until October 2018. Firstly, in a well-defined population catchment of  
317 approximately 100,000 individuals, a detailed demographic census survey will be  
318 undertaken. Secondly, in healthcare facilities utilised by the census population (as  
319 confirmed through a healthcare utilisation survey) prospective passive surveillance to  
320 detect cases of enteric fever will be performed. Thirdly, a seroincidence study will be

1  
2  
3 321 conducted in an age-stratified sample of the census population at each site,  
4  
5 322 collecting blood samples at intervals to estimate the rate of seroconversion to  
6  
7 323 typhoidal *Salmonella* antigens and hence the rate of subclinical/asymptomatic  
8  
9 324 exposure to these bacteria in the general population.  
10

11 325  
12  
13 326 To meet the further objectives, which include evaluating diagnostic tests, identifying  
14  
15 327 antimicrobial resistance patterns, exploring host susceptibility and bacterial  
16  
17 328 virulence/genomic variation, biological samples, specimens and metadata will be  
18  
19 329 collected during these individual studies. Data will be pooled to inform transmission  
20  
21 330 dynamic and health economic models that can be used to help design future vaccine  
22  
23 331 effectiveness studies and evaluate vaccine delivery strategies for widespread  
24  
25 332 deployment.  
26

27 333

#### 28 334 **STUDY SITES**

29 335 With known high incidence throughout South and Southeast Asia and a recent  
30  
31 336 increase in reported cases from sub-Saharan Africa<sup>46,47</sup> three sites were selected  
32  
33 337 from across Africa and Asia based on known high rates of enteric fever and the  
34  
35 338 research capacity to deliver a study of this size and logistical complexity. The three  
36  
37 339 sites differ in their epidemiological profiles and history of enteric fever incidence.  
38

39 340

#### 40 341 ***Dhaka, Bangladesh***

41 342 Mirpur is an area located within Dhaka Metropolitan area, Bangladesh (**Figure 1A**),  
42  
43 343 situated 7km north-west of the International Centre for Diarrhoeal Disease Research,  
44  
45 344 Bangladesh (icddr,b) main campus. The icddr,b manages two hospitals in Dhaka  
46  
47 345 city, one in the main campus in Dhaka (the main hospital) and another in the Mirpur  
48  
49 346 area known as MTC (Mirpur Treatment Centre) comprising a 50-bed inpatient facility.  
50  
51 347 As part of this programme, these and other health facilities (ten or more total) will be  
52  
53 348 kept under careful surveillance for enteric fever in the census area. The total  
54  
55  
56  
57  
58  
59  
60



1  
2  
3 349 catchment area for the field site for the STRATAA study is 10.79 km<sup>2</sup> with a total  
4  
5 350 population of about 603,658 at a density of 55946/km<sup>2</sup>. Approximately 98% of  
6  
7 351 residents have access to tap water supplied by the municipality while the remainder  
8  
9 352 use wells, hand pumps and other sources such as ponds and rivers in the study  
10  
11 353 area.

12  
13 354  
14  
15 355 Previous data from blood culture surveillance revealed a high incidence of disease  
16  
17 356 within Dhaka, with the burden particularly high in children under 5 years of age  
18  
19 357 (estimated at 18.7 episodes/1000 person-years in this age group). The current S.  
20  
21 358 Typhi:Paratyphi ratio is approximately 5:1. Typhoid fever is reported throughout the  
22  
23 359 year but peaks during the monsoon season.<sup>48,49</sup> Of note, 15% of S. Typhi isolates are  
24  
25 360 multi-drug resistant (MDR) and around 97% isolates are resistant to nalidixic acid<sup>50</sup>;  
26  
27 361 extended-spectrum beta-lactamase (ESBL) producing organisms have also been  
28  
29 362 isolated from enteric fever patients in this setting.  
30  
31 363

### 32 33 364 ***Blantyre, Malawi***

34  
35 365 Ndirande is a large urban township on the outskirts of Blantyre city, Malawi, 6km  
36  
37 366 from the main referral hospital (**Figure 1B**). It has a young population of around  
38  
39 367 100,000 people spread over 6.77km<sup>2</sup>. It is serviced by one health clinic staffed by  
40  
41 368 clinical officers. It has high reported rates of typhoid fever along with a population  
42  
43 369 HIV prevalence of around 18%.<sup>51</sup> Queen Elizabeth Central Hospital (QECH) in  
44  
45 370 Blantyre, Malawi, is the government-funded hospital for Blantyre district, serving a  
46  
47 371 local population of 1.3 million persons and provides tertiary care to southern Malawi.  
48  
49 372

50  
51 373 NTS have previously been the commonest cause of invasive bloodstream infections  
52  
53 374 in Blantyre,<sup>52</sup> but since 2011 there has been a rapid increase in the number of S.  
54  
55 375 Typhi cases seen at QECH, from approximately 14/year between 1998 and 2010 to  
56  
57 376 782 in 2014.<sup>46</sup> Much of this increase has been due to the emergence of the H58  
58  
59  
60

1  
2  
3 377 clone and is associated with an MDR phenotype<sup>47,53</sup>. This outbreak appears  
4  
5 378 unrelated to HIV-infection, but has resulted in high rates of mortality (2.5% adult and  
6  
7 379 paediatric) despite the availability of fluoroquinolone antibiotics.<sup>47</sup> In this setting,  
8  
9 380 enteric fever is seasonal, with the peak number of cases seen at the end of the wet  
10  
11 381 season and during the early dry season when the prevalence of malnutrition is also  
12  
13 382 highest.

### 14 15 383 16 17 384 **Patan, Nepal**

18  
19 385 Patan is located within the Lalitpur Sub-Metropolitan City (LSMC) within the  
20  
21 386 Kathmandu Valley, Nepal (**Figure 1C**). The population is generally poor, with most  
22  
23 387 living in overcrowded conditions and obtaining their water from stone spouts or  
24  
25 388 sunken wells. Patan Hospital is a 318-bed government hospital providing emergency  
26  
27 389 and elective outpatient and inpatient services to this area. The local catchment  
28  
29 390 population of the hospital is approximately 200,000 people in about 20 km<sup>2</sup>, with a  
30  
31 391 population density of 8,000/km<sup>2</sup>; there is a high rate of immigration for employment,  
32  
33 392 particularly young males from rural areas. Enteric fever is frequently managed in the  
34  
35 393 outpatient clinic at Patan Hospital, which has approximately 200,000 outpatient visits  
36  
37 394 annually.

38  
39 395  
40  
41 396 Uptake of typhoid Vi vaccination is limited and natural exposure/subclinical infection  
42  
43 397 is common.<sup>29</sup> Approximately 400 culture confirmed cases of enteric fever are  
44  
45 398 diagnosed at Patan Hospital each year, with a peak during the monsoon months. The  
46  
47 399 current *S. Typhi*:*Paratyphi A* ratio is approximately 1:1.<sup>54</sup> Antimicrobial resistance is  
48  
49 400 more commonly observed in *S. Paratyphi A* isolates; however, emergence of  
50  
51 401 fluoroquinolone resistant *S. Typhi* isolates has also been recently identified,<sup>55</sup>  
52  
53 402 whereas MDR strains of either serovar are rare.<sup>38</sup>

### 54 55 403 56 57 58 404 **POPULATION CENSUS**

1  
2  
3 405 In order to accurately calculate an incidence rate of typhoid fever for each of the  
4  
5 406 study sites, a demographic census will be performed at baseline and repeated at 2  
6  
7 407 years. The objective of the census is to identify/characterise the source population  
8  
9 408 corresponding to the catchment areas for the passive surveillance sites described  
10  
11 409 below, and estimate the person-time under surveillance.  
12

13 410  
14  
15 411 Census data will be updated with births, deaths and migrations every six months in  
16  
17 412 Dhaka and Patan, and at two years in Blantyre. The number of participants for the  
18  
19 413 demographic census survey in each site needed to produce a two-sided 95%  
20  
21 414 confidence interval with a precision (half-width) of 50% for the anticipated typhoid  
22  
23 415 incidence rate detected through passive clinical surveillance has been calculated  
24  
25 416 (**Table 2**). The necessary catchment population size is driven by the size required to  
26  
27 417 estimate the expected incidence rate in the 0-4 year-old age group, which is  
28  
29 418 estimated to be approximately 10% of the total population in each site.  
30

31 419  
32  
33 420  
34  
35  
36  
37  
38  
39  
40  
41  
42  
43  
44  
45  
46  
47  
48  
49  
50  
51  
52  
53  
54  
55  
56  
57  
58  
59  
60

421 **Table 2. Sample size required for the target populations in the three sites to**  
 422 **estimate annual, blood culture-confirmed typhoid incidence in passive clinical**  
 423 **surveillance.**

| Age groups | Anticipated typhoid incidence per 1000 persons* | Precision or half-width | Sample-size required |
|------------|-------------------------------------------------|-------------------------|----------------------|
| 0-4 years  | 1.5                                             | 0.75                    | 10,125               |
| 5-14 years | 1.0                                             | 0.5                     | 15,119               |
| >14 years  | 0.5                                             | 0.25                    | 29,801               |

424 \* Assumed age-specific incidence rates (based on data from Dhaka, Bangladesh,  
 425 Delhi, India, and Dong Thap, Vietnam).

426  
 427 The census will take place within a demarcated geographic area that is a known  
 428 catchment population for the surveillance sites (**Figure 1**). In total, at least 100,000  
 429 individuals will be enumerated from  $\geq 20,000$  households. The head/key informant  
 430 within the household will provide written informed consent to take part in the study.  
 431 Information on all residents within the household at the time of the census will be  
 432 gathered from the head of the household/key informant.

433  
 434 A household is defined as individuals living in the same dwelling or compound and  
 435 sharing food from the same kitchen. A household member is considered to have  
 436 migrated out if s/he has left the household and does not intend to come back within  
 437 six months of the time s/he left. A person is considered to have migrated in if s/he  
 438 was not previously included in the list of household members and intends to live in  
 439 the household for the next six months. At enrolment, the head of each household will

1  
2  
3 440 be made aware of the passive surveillance component of the study and encouraged  
4  
5 441 to use the field-site facilities capturing acute febrile illnesses, including acute enteric  
6  
7 442 fever cases. The characterised census population will form the sampling frame for  
8  
9 443 the further components (passive surveillance, healthcare utilisation/WASH surveys  
10  
11 444 and serosurvey) described below.  
12

13  
14

#### 15 446 **PASSIVE SURVEILLANCE**

16  
17 447 The passive surveillance component of STRATAA is designed to capture cases of  
18  
19 448 febrile disease occurring in each of the three census populations. Patients presenting  
20  
21 449 to any of the clinical surveillance sites with a history of subjective fever >72 hours or  
22  
23 450 objective fever >38.5 °C on presentation will be approached for enrolment.  
24

25  
26  
27

28 452 An index case will be defined as an individual with a blood culture result confirming  
29  
30 453 infection with *S. Typhi* or *S. Paratyphi A* (or NTS in Malawi), and whose household is  
31  
32 454 included in the census survey. These cases will be used to calculate the disease  
33  
34 455 incidence in each of the three census sites. Consenting individuals will have samples  
35  
36 456 of blood, urine and stool collected to determine a diagnosis of *S. Typhi*, *S. Paratyphi*  
37  
38 457 *A* or NTS and to provide material for the further diagnostic and genetic aims of the  
39  
40 458 study (**Supplemental Table 1**). Patients not resident in the census area will be  
41  
42 459 enrolled as additional cases for the laboratory and genetic components of the  
43  
44 460 programme if written consent is provided.  
45

46  
47

#### 48 462 **HEALTHCARE UTILISATION AND WATER, SANITATION AND HYGIENE**

##### 49 463 **SURVEYS**

50  
51 464 To characterise the healthcare-seeking behaviour of individuals living in the census  
52  
53 465 areas, at least 735 households will be randomly selected from the census area at  
54  
55 466 each site to participate in a healthcare utilisation survey. Data will be collected from  
56  
57 467 the head of the household/key informant to describe the actual and hypothetical  
58  
59  
60

1  
2  
3 468 usage of healthcare facilities for febrile episodes. The aim of this component is to  
4  
5 469 estimate the percent of cases (fulfilling the fever case definition) in each age stratum  
6  
7 470 (0-4 years, 5-14 years and >14 years of age) who would or would not seek attention  
8  
9 471 at one of the designated passive surveillance health facilities. Additional data  
10  
11 472 regarding sanitation and hygiene facilities and usage will also be collected. Annual  
12  
13 473 data collection periods will coincide with the peak typhoid season at each of the three  
14  
15 474 sites.

16  
17 47518  
19 476 **SEROSURVEYS**

20  
21 477 To estimate the seroincidence and seroprevalence of clinical (both formally  
22  
23 478 diagnosed and undiagnosed cases) and subclinical infection or exposure to *S. Typhi*  
24  
25 479 and *S. Paratyphi*, systematic serosurveillance will be performed at each site. Blood  
26  
27 480 samples will be collected at baseline and 3 months later, with sample collection  
28  
29 481 initiated in an on-going basis over the course of one year (**Table 3**). To identify  
30  
31 482 participants for the serosurvey, an age-stratified approach will be used to randomly  
32  
33 483 select individuals from the census population from each age group. Suitable  
34  
35 484 participants will be enrolled by field workers; where the individual identified is not  
36  
37 485 available, a household member in the same age group will be selected where  
38  
39 486 possible.

40  
41 487

42  
43 488 Seroincidence (indicative of recent infection) will be calculated by measuring the rate  
44  
45 489 of seroconversion to anti-H(d) (anti-flagellin) IgG and other acute phase antibodies  
46  
47 490 between both time points, with the denominator consisting only of individuals  
48  
49 491 sampled twice and seronegative at the first time point.<sup>56</sup>

50  
51 492

52  
53 493 **Table 3. Sample size calculations for the serological surveys to estimate age-**  
54  
55 494 **specific rates of high titres of serum IgG anti-H(d) antibodies.** Assumes age-

495 stratified individual sampling; also accounts for detection of 1% chronic carriage rate  
 496 in  $\geq 10$  year olds.

|              | Anticipate<br>d sero-<br>incidence<br>(%) | Number<br>of initial<br>samples | Anticipat<br>ed<br>number<br>of<br>events | No. of<br>follow-<br>up<br>samples<br>* | No. of<br>events<br>detected | Binomial<br>[95% | Exact<br>CI] | Probabili<br>ty of<br>observin<br>g 0<br>events |
|--------------|-------------------------------------------|---------------------------------|-------------------------------------------|-----------------------------------------|------------------------------|------------------|--------------|-------------------------------------------------|
| 0-4 yrs      | 0.2                                       | 2500                            | 5                                         | 2000                                    | 4                            | 0.0005           | 0.0051       | 0.0182                                          |
| 5-9 yrs      | 0.4                                       | 1300                            | 5.2                                       | 1040                                    | 4                            | 0.0010           | 0.0098       | 0.0155                                          |
| 10-14<br>yrs | 0.8                                       | 800                             | 6.4                                       | 640                                     | 5                            | 0.0025           | 0.0181       | 0.0059                                          |
| >14 yrs      | 0.2                                       | 3900                            | 7.8                                       | 3120                                    | 6                            | 0.0007           | 0.0042       | 0.0019                                          |
| <b>TOTAL</b> |                                           | <b>8500</b>                     | <b>24.2</b>                               | <b>6800</b>                             | <b>19</b>                    |                  |              |                                                 |

497 \*Assuming 5% migration and 15% refusal

498

499 The seroprevalence of anti-Vi IgG will also be measured at baseline to identify  
 500 individuals who could be potential chronic carriers. Previous studies have used high  
 501 anti-Vi IgG antibody levels in serum as a marker of chronic carriage, and our aim is  
 502 to use a recently validated/approved anti-Vi ELISA method to determine possible  
 503 rates of chronic carriage across the three populations.<sup>32,57,58</sup> In order to validate this  
 504 method and to identify possible chronic carriers in the population (in addition to  
 505 identifying whether there may be specific host genetic risk factors for chronic  
 506 carriage), those individuals with a 'high' serum anti-Vi IgG titre will be re-approached  
 507 and asked to provide two stool samples within 48 hours. With the agreement of  
 508 relevant local ethics committees, identified chronic carriers (confirmed high anti-Vi  
 509 IgG serum sample with a positive stool culture) will be treated with antibiotics for  
 510 chronic carriage and clearance of bacterial shedding will be confirmed.

1  
2  
3 5114  
5 512 **HOUSEHOLD CONTACTS**

6  
7 513 To further investigate possible transmission links, household contacts of index cases  
8  
9 514 presenting with blood-culture confirmed *S. Typhi* or *S. Paratyphi A* infection will be  
10  
11 515 identified through the census data collection and approached to take part in this  
12  
13 516 component of the study. Up to five members of the household, with consent, will be  
14  
15 517 asked to provide a blood and stool sample at the time of discharge of the index case,  
16  
17 518 a further stool sample at one month and repeat serology at six months  
18  
19 519 (**Supplemental Table 1**), and asked about the occurrence of symptoms. These  
20  
21 520 samples will be investigated to identify those with subclinical infection or possible  
22  
23 521 chronic carriers. Secondary attack rates for the occurrence of symptomatic infection  
24  
25 522 will be estimated. If serology suggests chronic carriage in a household contact,  
26  
27 523 additional blood and stool samples will be collected to confirm this, and antimicrobial  
28  
29 524 treatment to eradicate carriage will be proposed.

30  
31 525

32  
33 526 Those individuals who are identified as shedding bacteria but without high serum  
34  
35 527 anti-Vi IgG levels will be followed up at a one-year interval to repeat stool culture.  
36  
37 528 Repeat blood samples will be collected from household contacts approximately 3  
38  
39 529 months after initial sampling to explore whether rates of seroconversion are higher in  
40  
41 530 these individuals compared with those in the general population. At least 73  
42  
43 531 households of index cases are expected to be enrolled in this component of the  
44  
45 532 study.

46  
47  
48 533

49 534 In a similar approach to the acute cases of typhoid infection, where chronic carriers  
50  
51 535 are identified from the serosurveys, household transmission studies will be  
52  
53 536 performed among household contacts of possible chronic carriers (i.e. those with a  
54  
55 537 'high' serum anti-Vi IgG titre). A one-time attempt will be made to enroll up to five  
56  
57 538 members of the household, sampling serology and stool looking for evidence of  
58  
59  
60



1  
2  
3 539 typhoid infection. This will provide data on secondary attack rates for both acute and  
4  
5 540 chronic typhoid states.

6  
7 541

## 8 9 542 **DATA MANAGEMENT AND ANALYSIS**

10  
11 543 Census and serosurvey data collection forms will be developed through a structured  
12  
13 544 iterative process and then implemented using Open Data Kit<sup>59</sup>, a system enabling  
14  
15 545 electronic mobile data collection, with customizations by Nafundi, USA, on Android-  
16  
17 546 based tablets. Each household within the census will be assigned a unique study ID  
18  
19 547 and geo-located using GPS where possible; individuals will be given a member  
20  
21 548 number within the household. This information will be collected by local enumerators  
22  
23 549 over a one- to four-month period via these forms and adapted to the three  
24  
25 550 geographic settings. Data will be uploaded onto MySQL databases, where SQL  
26  
27 551 routines will be run nightly to enforce data cleaning on critical variables beyond  
28  
29 552 ODK's validation routines. Daily anonymized data will be backed up from the three  
30  
31 553 sites centrally. For the passive surveillance and household contacts studies a  
32  
33 554 combination of tablet and paper based case report forms will be used to capture the  
34  
35 555 data. Data from paper forms will be transcribed onto electronic databases using  
36  
37 556 Open Clinica<sup>60</sup>. Database reports and descriptive analyses will be generated weekly.  
38  
39 557 To assess efficiency and quality of data capture, the volume, accuracy and time of  
40  
41 558 data collection can be quantified.

42  
43 559 The distribution and burden of enteric illness is likely to vary between countries and  
44  
45 560 thus analyses will be conducted separately for each country. Where data are  
46  
47 561 combined across countries, an adjustment for country differences will be included in  
48  
49 562 statistical models.

50  
51 563

## 52 53 564 **ETHICS**

54  
55 565 Written informed consent will be obtained from the head of each household (as the  
56  
57 566 "key informant") on behalf of the entire household in the demographic census and  
58  
59  
60

1  
2  
3 567 healthcare utilisation surveys. In each of the other components, individual written  
4  
5 568 informed consent will be obtained from individuals over the age of 18 or by a  
6  
7 569 parent/guardian from individuals below this age with additional assent sought from  
8  
9 570 those between 11-17 years old.

10  
11 571 This protocol has received ethics approval from the Oxford Tropical Research Ethics  
12  
13 572 Committee, the Malawian National Health Sciences Research Committee and  
14  
15 573 University of Malawi Research Ethics Committee, the Nepal Health Research  
16  
17 574 Council and the icddr, b Institutional Review Board.

18  
19  
20 575

## 21 576 **DISSEMINATION**

22  
23 577 We hope to make the results from these studies widely available and plan to  
24  
25 578 disseminate our analyses in international peer-reviewed journals. Investigators will  
26  
27 579 be involved in reviewing drafts of the manuscripts, abstracts, press releases and any  
28  
29 580 other publications arising from the study. Furthermore, data from these studies will  
30  
31 581 also be used in the submission of post-doctoral theses.

32  
33  
34 582

## 35 583 **COMMUNITY PUBLIC ENGAGEMENT**

36  
37 584 A collection of specific activities engaging the local population with both the subject  
38  
39 585 of typhoid fever and the activities of the study have been carried out. In Malawi for  
40  
41 586 example, community leaders have been informed and consulted on certain aspects  
42  
43 587 of the study, shown the proposed activities of study teams and given tours of  
44  
45 588 research facilities. There has been engagement with various forms of media  
46  
47 589 disseminating information on the importance of typhoid and study aims. In Nepal,  
48  
49 590 field staff have been given detailed information to communicate to the local  
50  
51 591 populations.

52  
53 592 Further activities are planned to ensure the local populations are informed and  
54  
55 593 engaged.

56  
57  
58 594  
59  
60

1  
2  
3 595 **DISCUSSION**

4 596 The STRATAA study is a comprehensive multicentre study aiming to improve  
5  
6 597 understanding of typhoidal *Salmonella* infection in high-risk endemic populations.  
7  
8 598 This study has been designed to answer key questions and data gaps identified  
9  
10 599 through an innovative application of recent mathematical modelling. These include  
11  
12 600 measuring the burden of age-stratified disease, identifying the relative contribution of  
13  
14 601 asymptomatic/subclinical *Salmonella* infection/exposure, and estimating the  
15  
16 602 contribution to ongoing transmission from the chronic carrier state. These data will  
17  
18 603 inform further modelling required to develop and optimise disease control and  
19  
20 604 prevention strategies that will eventually lead to disease elimination.  
21  
22  
23  
24  
25  
26  
27  
28  
29  
30  
31  
32  
33  
34  
35  
36  
37  
38  
39  
40  
41  
42  
43  
44  
45  
46  
47  
48  
49  
50  
51  
52  
53  
54  
55  
56  
57  
58  
59  
60

1  
2  
3 605 **COMPETING INTERESTS**

4  
5 606 AJP chairs the UK Department of Health's (DH) Joint Committee on Vaccination and  
6  
7 607 Immunisation (JCVI) and the European Medicines Agency (EMA) Scientific Advisory  
8  
9 608 Group on Vaccines and is a member of WHO's SAGE. The views expressed in this  
10  
11 609 manuscript do not necessarily reflect those of JCVI, DH, EMA or WHO. AJP has  
12  
13 610 previously conducted clinical trials on behalf of the University of Oxford funded by  
14  
15 611 vaccine manufacturers but has no personal financial interests.  
16

17  
18  
19 613 **FUNDING**

20  
21 614 Funding for the STRATAA study has been provided by a Wellcome Trust Strategic  
22  
23 615 Award (No. 106158/Z/14/Z) and the Bill and Melinda Gates Foundation (No.  
24  
25 616 OPP1141321). The Malawi-Liverpool-Wellcome Programme and the Oxford  
26  
27 617 University Clinical Research Unit in Vietnam are supported by the Wellcome Trust  
28  
29 618 with Major Overseas Programme core awards. Neither funding body had any role in  
30  
31 619 designing the study, writing this manuscript or the decision to submit.  
32

33  
34 620

35 621 **Authors contributions**

36  
37 622 The manuscript was drafted by TD and JM. All authors read, critically revised and  
38  
39 623 approved the final manuscript.  
40

41  
42 624

43  
44 625

- 45  
46 626 1. Crump, J. A. & Mintz, E. D. Global trends in typhoid and paratyphoid Fever.  
47  
48 627 *Clin. Infect. Dis.* **50**, 241–6 (2010).  
49  
50 628 2. Buckle, G. C., Walker, C. L. F. & Black, R. E. Typhoid fever and paratyphoid  
51  
52 629 fever: Systematic review to estimate global morbidity and mortality for 2010. *J.*  
53  
54 630 *Glob. Health* **2**, 10401 (2012).  
55  
56 631 3. Mogasale, V. *et al.* Burden of typhoid fever in low-income and middle-income  
57  
58 632 countries: a systematic, literature-based update with risk-factor adjustment.  
59  
60

- 1  
2  
3 633 *Lancet. Glob. Heal.* **2**, e570-80 (2014).  
4  
5 634 4. Arndt, M. B. *et al.* Estimating the Burden of Paratyphoid A in Asia and Africa.  
6  
7 635 *PLoS Negl. Trop. Dis.* **8**, e2925 (2014).  
8  
9 636 5. Darton, T. C., Blohmke, C. J. & Pollard, A. J. Typhoid epidemiology,  
10  
11 637 diagnostics and the human challenge model. *Curr. Opin. Gastroenterol.* **30**, 7–  
12  
13 638 17 (2014).  
14  
15 639 6. Wong, V. K. *et al.* Phylogeographical analysis of the dominant multidrug-  
16  
17 640 resistant H58 clade of *Salmonella Typhi* identifies inter- and intracontinental  
18  
19 641 transmission events. *Nat. Genet.* **47**, 632–639 (2015).  
20  
21 642 7. WHO | WHO/IVB/12.02. WHO (2013).  
22  
23 643 8. Szu, S. C. Development of Vi conjugate – a new generation of typhoid  
24  
25 644 vaccine. *Expert Rev. Vaccines* **12**, 1273–1286 (2013).  
26  
27 645 9. Szu, S. C., Stone, A. L., Robbins, J. D., Schneerson, R. & Robbins, J. B. Vi  
28  
29 646 capsular polysaccharide-protein conjugates for prevention of typhoid fever.  
30  
31 647 Preparation, characterization, and immunogenicity in laboratory animals. *J.*  
32  
33 648 *Exp. Med.* **166**, 1510–24 (1987).  
34  
35 649 10. Lin, F. Y. C. *et al.* The Efficacy of a *Salmonella typhi* Vi Conjugate Vaccine in  
36  
37 650 Two-to-Five-Year-Old Children. *N. Engl. J. Med.* **344**, 1263–1269 (2001).  
38  
39 651 11. Saul, A., Smith, T. & Maire, N. Stochastic Simulation of Endemic *Salmonella*  
40  
41 652 *enterica* Serovar Typhi: The Importance of Long Lasting Immunity and the  
42  
43 653 Carrier State. *PLoS One* **8**, e74097 (2013).  
44  
45 654 12. Pitzer, V. E. *et al.* Predicting the Impact of Vaccination on the Transmission  
46  
47 655 Dynamics of Typhoid in South Asia: A Mathematical Modeling Study. *PLoS*  
48  
49 656 *Negl. Trop. Dis.* **8**, e2642 (2014).  
50  
51 657 13. Watson, C. H. & Edmunds, W. J. A review of typhoid fever transmission  
52  
53 658 dynamic models and economic evaluations of vaccination. *Vaccine* **33 Suppl**  
54  
55 659 **3**, C42-54 (2015).  
56  
57 660 14. Crump, J. A., Ram, P. K., Gupta, S. K., Miller, M. A. & Mintz, E. D. Part I.

- 1  
2  
3 661 Analysis of data gaps pertaining to Salmonella enterica serotype Typhi  
4  
5 662 infections in low and medium human development index countries, 1984-2005.  
6  
7 663 *Epidemiol. Infect.* **136**, 436–48 (2008).  
8  
9 664 15. Havelaar, A. H. *et al.* World Health Organization Global Estimates and  
10  
11 665 Regional Comparisons of the Burden of Foodborne Disease in 2010. *PLOS*  
12  
13 666 *Med.* **12**, e1001923 (2015).  
14  
15 667 16. Murray, C. J. L. *et al.* Disability-adjusted life years (DALYs) for 291 diseases  
16  
17 668 and injuries in 21 regions, 1990-2010: a systematic analysis for the Global  
18  
19 669 Burden of Disease Study 2010. *Lancet (London, England)* **380**, 2197–223  
20  
21 670 (2012).  
22  
23 671 17. Kyu, H. H. *et al.* Global and National Burden of Diseases and Injuries Among  
24  
25 672 Children and Adolescents Between 1990 and 2013. *JAMA Pediatr.* **170**, 267  
26  
27 673 (2016).  
28  
29 674 18. Mogasale, V., Ramani, E., Mogasale, V. V & Park, J. What proportion of  
30  
31 675 Salmonella Typhi cases are detected by blood culture? A systematic literature  
32  
33 676 review. *Ann. Clin. Microbiol. Antimicrob.* **15**, 32 (2016).  
34  
35 677 19. Mogasale, V. *et al.* Revisiting typhoid fever surveillance in low and middle  
36  
37 678 income countries: lessons from systematic literature review of population-  
38  
39 679 based longitudinal studies. *BMC Infect. Dis.* **16**, 35 (2016).  
40  
41 680 20. Olopoenia, L. A. & King, A. L. Widal agglutination test - 100 years later: still  
42  
43 681 plagued by controversy. *Postgrad. Med. J.* **76**, 80–4 (2000).  
44  
45 682 21. Baker, S. *et al.* Searching for the elusive typhoid diagnostic. *BMC Infect. Dis.*  
46  
47 683 **10**, 45 (2010).  
48  
49 684 22. Waddington, C. S. *et al.* An Outpatient, Ambulant-Design, Controlled Human  
50  
51 685 Infection Model Using Escalating Doses of Salmonella Typhi Challenge  
52  
53 686 Delivered in Sodium Bicarbonate Solution. *Clin. Infect. Dis.* **58**, 1230–1240  
54  
55 687 (2014).  
56  
57 688 23. Keddy, K. H. *et al.* Sensitivity and specificity of typhoid fever rapid antibody  
58  
59  
60

- 1  
2  
3 689 tests for laboratory diagnosis at two sub-Saharan African sites. *Bull. World*  
4  
5 690 *Health Organ.* **89**, 640–7 (2011).  
6  
7 691 24. Parry, C. M., Wijedoru, L., Arjyal, A. & Baker, S. The utility of diagnostic tests  
8  
9 692 for enteric fever in endemic locations. *Expert Rev. Anti. Infect. Ther.* **9**, 711–  
10  
11 693 725 (2011).  
12  
13 694 25. Näsström, E. *et al.* *Salmonella* Typhi and *Salmonella* Paratyphi A elaborate  
14  
15 695 distinct systemic metabolite signatures during enteric fever. *Elife* **3**, e56971  
16  
17 696 (2014).  
18  
19 697 26. Thompson, L. J. *et al.* Transcriptional response in the peripheral blood of  
20  
21 698 patients infected with *Salmonella enterica* serovar Typhi. *Proc. Natl. Acad. Sci.*  
22  
23 699 **106**, 22433–22438 (2009).  
24  
25 700 27. Blohmke, C. J. *et al.* Interferon-driven alterations of the host's amino acid  
26  
27 701 metabolism in the pathogenesis of typhoid fever. *J. Exp. Med.* **213**, 1061–1077  
28  
29 702 (2016).  
30  
31 703 28. Levine, M. M., Black, R. E. & Lanata, C. Precise estimation of the numbers of  
32  
33 704 chronic carriers of *Salmonella typhi* in Santiago, Chile, an endemic area. *J.*  
34  
35 705 *Infect. Dis.* **146**, 724–6 (1982).  
36  
37 706 29. Pulickal, A. S. *et al.* Kinetics of the Natural, Humoral Immune Response to  
38  
39 707 *Salmonella enterica* Serovar Typhi in Kathmandu, Nepal. *Clin. Vaccine*  
40  
41 708 *Immunol.* **16**, 1413–1419 (2009).  
42  
43 709 30. Levine, M. M. *et al.* Diagnostic value of the Widal test in areas endemic for  
44  
45 710 typhoid fever. *Am. J. Trop. Med. Hyg.* **27**, 795–800 (1978).  
46  
47 711 31. Lanata, C. F. *et al.* Vi serology in detection of chronic *Salmonella typhi* carriers  
48  
49 712 in an endemic area. *Lancet (London, England)* **2**, 441–3 (1983).  
50  
51 713 32. Nolan, C. M. *et al.* Evaluation of a new assay for Vi antibody in chronic carriers  
52  
53 714 of *Salmonella typhi*. *J. Clin. Microbiol.* **12**, 22–6 (1980).  
54  
55 715 33. Gupta, A. *et al.* Evaluation of community-based serologic screening for  
56  
57 716 identification of chronic *Salmonella Typhi* carriers in Vietnam. *Int. J. Infect. Dis.*

- 1  
2  
3 717 **10**, 309–314 (2006).  
4  
5 718 34. Liang, L. *et al.* Immune profiling with a Salmonella Typhi antigen microarray  
6  
7 719 identifies new diagnostic biomarkers of human typhoid. *Sci. Rep.* **3**, 1043  
8  
9 720 (2013).  
10  
11 721 35. Dunstan, S. J. *et al.* Variation at HLA-DRB1 is associated with resistance to  
12  
13 722 enteric fever. *Nat. Genet.* **46**, 1333–1336 (2014).  
14  
15 723 36. Dunstan, S. J. *et al.* A TNF region haplotype offers protection from typhoid  
16  
17 724 fever in Vietnamese patients. *Hum. Genet.* **122**, 51–61 (2007).  
18  
19 725 37. Holt, K. E. *et al.* High-throughput sequencing provides insights into genome  
20  
21 726 variation and evolution in Salmonella Typhi. *Nat. Genet.* **40**, 987–993 (2008).  
22  
23 727 38. Baker, S. *et al.* Combined high-resolution genotyping and geospatial analysis  
24  
25 728 reveals modes of endemic urban typhoid fever transmission. *Open Biol.* **1**,  
26  
27 729 (2011).  
28  
29 730 39. Dongol, S. *et al.* The Microbiological and Clinical Characteristics of Invasive  
30  
31 731 Salmonella in Gallbladders from Cholecystectomy Patients in Kathmandu,  
32  
33 732 Nepal. *PLoS One* **7**, e47342 (2012).  
34  
35 733 40. WHO. WHO | Typhoid vaccines position paper. *WHO* (2008).  
36  
37 734 41. Thiem, V. D. *et al.* The Vi Conjugate Typhoid Vaccine Is Safe, Elicits  
38  
39 735 Protective Levels of IgG Anti-Vi, and Is Compatible with Routine Infant  
40  
41 736 Vaccines. *Clin. Vaccine Immunol.* **18**, 730–735 (2011).  
42  
43 737 42. Mohan, V. K. *et al.* Safety and Immunogenicity of a Vi Polysaccharide–  
44  
45 738 Tetanus Toxoid Conjugate Vaccine (Typbar-TCV) in Healthy Infants, Children,  
46  
47 739 and Adults in Typhoid Endemic Areas: A Multicenter, 2-Cohort, Open-Label,  
48  
49 740 Double-Blind, Randomized Controlled Phase 3 Study. *Clin. Infect. Dis.* **61**,  
50  
51 741 393–402 (2015).  
52  
53 742 43. Mitra, M. *et al.* Efficacy and safety of vi-tetanus toxoid conjugated typhoid  
54  
55 743 vaccine (PedaTyph™) in Indian children: School based cluster randomized  
56  
57 744 study. *Hum. Vaccin. Immunother.* **12**, 939–945 (2016).  
58  
59  
60



- 1  
2  
3 745 44. Darton, T. C. *et al.* Using a Human Challenge Model of Infection to Measure  
4 Vaccine Efficacy: A Randomised, Controlled Trial Comparing the Typhoid  
5 746 Vaccines M01ZH09 with Placebo and Ty21a. *PLoS Negl. Trop. Dis.* **10**,  
6 747 e0004926 (2016).  
7  
8  
9 748  
10  
11 749 45. Azmatullah, A., Qamar, F. N., Thaver, D., Zaidi, A. K. & Bhutta, Z. A.  
12 Systematic review of the global epidemiology, clinical and laboratory profile of  
13 750 enteric fever. *J. Glob. Health* **5**, 20407 (2015).  
14 751  
15  
16  
17 752 46. Feasey, N. A. *et al.* Three Epidemics of Invasive Multidrug-Resistant  
18 *Salmonella* Bloodstream Infection in Blantyre, Malawi, 1998–2014. *Clin. Infect.*  
19 753 *Dis.* **61**, S363–S371 (2015).  
20 754  
21  
22  
23 755 47. Feasey, N. A. *et al.* Rapid Emergence of Multidrug Resistant, H58-Lineage  
24 756 *Salmonella* Typhi in Blantyre, Malawi. *PLoS Negl. Trop. Dis.* **9**, e0003748  
25  
26 757 (2015).  
27  
28  
29 758 48. Saha, S. K. *et al.* Typhoid fever in Bangladesh: implications for vaccination  
30 759 policy. *Pediatr. Infect. Dis. J.* **20**, 521–4 (2001).  
31  
32  
33 760 49. Brooks, W. A. *et al.* Bacteremic Typhoid Fever in Children in an Urban Slum,  
34 761 Bangladesh. *Emerg. Infect. Dis.* **11**, 326–329 (2005).  
35  
36  
37 762 50. Khanam, F. *et al.* Typhoid fever in young children in Bangladesh: clinical  
38 763 findings, antibiotic susceptibility pattern and immune responses. *PLoS Negl.*  
39 764 *Trop. Dis.* **9**, e0003619 (2015).  
40  
41  
42  
43 765 51. Choko, A. T. *et al.* The Uptake and Accuracy of Oral Kits for HIV Self-Testing  
44 766 in High HIV Prevalence Setting: A Cross-Sectional Feasibility Study in  
45 767 Blantyre, Malawi. *PLoS Med.* **8**, e1001102 (2011).  
46  
47  
48  
49 768 52. Gordon, M. A. *et al.* Epidemics of Invasive *Salmonella enterica* Serovar  
50 769 Enteritidis and *S. enterica* Serovar Typhimurium Infection Associated with  
51 770 Multidrug Resistance among Adults and Children in Malawi. *Clin. Infect. Dis.*  
52 771 **46**, 963–969 (2008).  
53  
54  
55  
56  
57 772 53. Pitzer, V. E. *et al.* Mathematical Modeling to Assess the Drivers of the Recent

- 1  
2  
3 773 Emergence of Typhoid Fever in Blantyre, Malawi. *Clin. Infect. Dis.* **61**, S251–  
4  
5 774 S258 (2015).  
6  
7 775 54. Karkey, A. *et al.* The Burden and Characteristics of Enteric Fever at a  
8  
9 776 Healthcare Facility in a Densely Populated Area of Kathmandu. *PLoS One* **5**,  
10  
11 777 e13988 (2010).  
12  
13 778 55. Pham Thanh, D. *et al.* A novel ciprofloxacin-resistant subclade of H58  
14  
15 779 *Salmonella* Typhi is associated with fluoroquinolone treatment failure. *Elife* **5**,  
16  
17 780 e14003 (2016).  
18  
19 781 56. Calderón, I. *et al.* Antibodies to porin antigens of *Salmonella typhi* induced  
20  
21 782 during typhoid infection in humans. *Infect. Immun.* **52**, 209–12 (1986).  
22  
23 783 57. Nolan, C. M. *et al.* Vi serology in the detection of typhoid carriers. *Lancet*  
24  
25 784 (*London, England*) **1**, 583–5 (1981).  
26  
27 785 58. Ferry, B. L. *et al.* Development of an anti-*Salmonella typhi* Vi ELISA:  
28  
29 786 assessment of immunocompetence in healthy donors. *Clin. Exp. Immunol.*  
30  
31 787 **136**, 297–303 (2004).  
32  
33 788 59. ODK. Open Data Kit. at <<https://opendatakit.org/>>  
34  
35 789 60. OpenClinica - Electronic data capture for clinical research. at  
36  
37 790 <<https://www.openclinica.com/>>  
38  
39 791  
40  
41  
42  
43  
44  
45  
46  
47  
48  
49  
50  
51  
52  
53  
54  
55  
56  
57  
58  
59  
60

792 **Figure Legends**

793 **Figure 1. Description of STRATAA study field sites, demonstrating (i) the**  
 794 **location of the three sampling sites in (A) Mirpur (Dhaka, Bangladesh), (B)**  
 795 **Ndirande (Blantyre, Malawi) and (C) Patan (Kathmandu, Nepal), (ii) the**  
 796 **historical number of typhoid cases detected per month at each site (blue box**  
 797 **marks the annual monsoon season), and (iii) examples of the local terrain.**

798

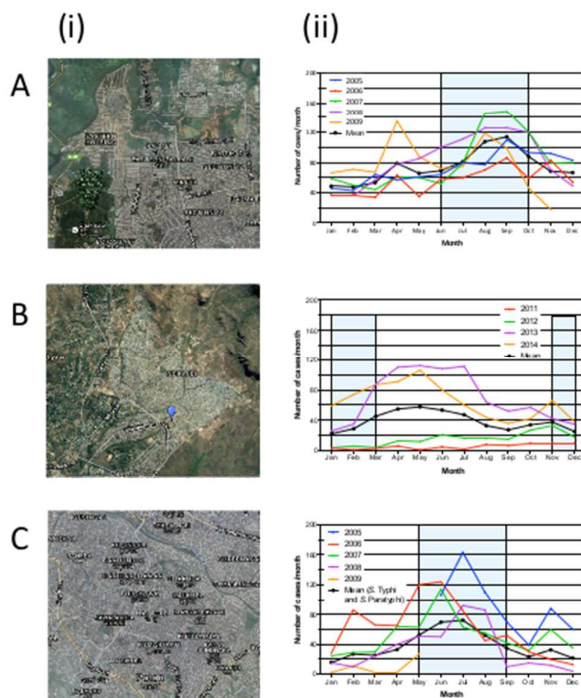

799

only

1  
2  
3  
4  
5  
6  
7  
8  
9  
10  
11  
12  
13  
14  
15  
16  
17  
18  
19  
20  
21  
22  
23  
24  
25  
26  
27  
28  
29  
30  
31  
32  
33  
34  
35  
36  
37  
38  
39  
40  
41  
42  
43  
44  
45  
46  
47  
48  
49  
50  
51  
52  
53  
54  
55  
56  
57  
58  
59  
60

800 Supplemental Table 1. Overview of STRATAA Study Procedures.

| Study component                            | CENSUS            |                |                |                |                |                |    | HEALTHCARE UTILISATION     |                           | PASSIVE SURVEILLANCE |       |   |                                   |                |   |   |                 | SEROSURVEY |                                         |                           |   |   |
|--------------------------------------------|-------------------|----------------|----------------|----------------|----------------|----------------|----|----------------------------|---------------------------|----------------------|-------|---|-----------------------------------|----------------|---|---|-----------------|------------|-----------------------------------------|---------------------------|---|---|
|                                            |                   |                |                |                |                |                |    | Peak seasons during census | All cases                 |                      |       |   | Household contacts of index cases |                |   |   | Participants    |            | Household contacts of possible carriers |                           |   |   |
|                                            |                   |                |                |                |                |                |    |                            | Cases within census area* |                      |       |   |                                   |                |   |   |                 |            |                                         |                           |   |   |
| Sample size (individuals unless specified) | ≥100 000 per site |                |                |                |                |                |    | >700 households            |                           | Convenience          |       |   |                                   | ≥73 households |   |   |                 | 8500       | 6800                                    | Members of ≥50 households |   |   |
| Time (months, unless specified)            | 0                 | 4              | 8              | 12             | 16             | 20             | 24 | 1st                        | 2nd                       | 0                    | Day 8 | 1 | ~6                                | 12             | 0 | 1 | ~3              | ~12        | 0                                       | **                        | 3 | 6 |
| Consent                                    | X                 |                |                |                |                |                |    | X                          |                           | X                    |       |   |                                   |                | X |   | X <sup>§§</sup> |            | X                                       |                           |   | x |
| Demographic Information                    | X                 | X <sup>#</sup> | X <sup>#</sup> | X <sup>#</sup> | X <sup>#</sup> | X <sup>#</sup> | X  |                            |                           |                      |       |   |                                   |                |   |   |                 |            |                                         |                           |   |   |
| Clinical information                       |                   |                |                |                |                |                |    |                            |                           | X                    | X     | X | X                                 | X              | X |   |                 |            |                                         |                           |   |   |
| Questionnaire                              |                   |                |                |                |                |                |    | X                          | X                         |                      |       |   |                                   |                |   |   |                 |            |                                         |                           |   |   |
| Blood sample                               |                   |                |                |                |                |                |    |                            |                           | X <sup>@</sup>       |       |   | X                                 |                | X |   | X <sup>§</sup>  |            | X <sup>@</sup>                          |                           | X | X |
| Stool sample                               |                   |                |                |                |                |                |    |                            |                           | X                    |       | X | X                                 | (X)            | X | X | 2X <sup>€</sup> | (3X)       |                                         | 2X <sup>€</sup>           |   | X |

|              |  |  |  |  |  |  |  |  |    |  |  |  |  |  |  |  |  |    |  |  |  |
|--------------|--|--|--|--|--|--|--|--|----|--|--|--|--|--|--|--|--|----|--|--|--|
| Urine sample |  |  |  |  |  |  |  |  | X@ |  |  |  |  |  |  |  |  | X@ |  |  |  |
|--------------|--|--|--|--|--|--|--|--|----|--|--|--|--|--|--|--|--|----|--|--|--|

801

802 \* Case within census area = index if blood-culture confirmed typhoid diagnosis, resident in census area and household members consent  
803 to participation.

804 # Births, deaths and migrations updated every 4 months in Nepal & Bangladesh

805 ~ approximately - dependent on timeframe of availability for the Vi ELISA result

806 \$ Host genetics collected/used for laboratory studies if either stool or serum positive or both

807 § separate consent for host genetics

808 @ additional blood (RNA + plasma) and urine samples (subset of 100 with typhoid (culture positive), 100 with clinically suspected typhoid  
809 (culture negative), 100 with alternate bacteraemia; and 100 healthy controls (from the serosurvey) from adults 16-40yrs who give  
810 consent for genetic assays to be performed.

811 € Participants identified as having high anti-Vi IgG only - 2 stool samples collected 48 hours apart once ELISA result known to  
812 identify/confirm carriage

813 \*\* When result known

814 Total blood volumes: **Passive survey** ≤16 mL adults (>16 years), ≤7 mL children (<16 years); **Serosurvey** ≤8 mL adults (>16 years), ≤7 mL  
815 children. Cell pellets stored for host genetics.

# BMJ Open

## THE STRATAA STUDY PROTOCOL: A PROGRAMME TO ASSESS THE BURDEN OF ENTERIC FEVER IN BANGLADESH, MALAWI AND NEPAL USING PROSPECTIVE POPULATION CENSUS, PASSIVE SURVEILLANCE, SEROLOGICAL STUDIES AND HEALTHCARE UTILISATION SURVEYS

|                               |                                                                                                                                                                                                                                                                                                                                                                                                                                                                                                                                                                                                                                                                                                                                                                                                                                                                                                                                                                                                                                                                                                                                                                                                                                                                                                                                                                                                                                                                                                                                                                                                                                                                                                                                                                                                                                                                                                                                                                                                                                                                                                                                                                                                                                                                                                                                                       |
|-------------------------------|-------------------------------------------------------------------------------------------------------------------------------------------------------------------------------------------------------------------------------------------------------------------------------------------------------------------------------------------------------------------------------------------------------------------------------------------------------------------------------------------------------------------------------------------------------------------------------------------------------------------------------------------------------------------------------------------------------------------------------------------------------------------------------------------------------------------------------------------------------------------------------------------------------------------------------------------------------------------------------------------------------------------------------------------------------------------------------------------------------------------------------------------------------------------------------------------------------------------------------------------------------------------------------------------------------------------------------------------------------------------------------------------------------------------------------------------------------------------------------------------------------------------------------------------------------------------------------------------------------------------------------------------------------------------------------------------------------------------------------------------------------------------------------------------------------------------------------------------------------------------------------------------------------------------------------------------------------------------------------------------------------------------------------------------------------------------------------------------------------------------------------------------------------------------------------------------------------------------------------------------------------------------------------------------------------------------------------------------------------|
| Journal:                      | <i>BMJ Open</i>                                                                                                                                                                                                                                                                                                                                                                                                                                                                                                                                                                                                                                                                                                                                                                                                                                                                                                                                                                                                                                                                                                                                                                                                                                                                                                                                                                                                                                                                                                                                                                                                                                                                                                                                                                                                                                                                                                                                                                                                                                                                                                                                                                                                                                                                                                                                       |
| Manuscript ID                 | bmjopen-2017-016283.R1                                                                                                                                                                                                                                                                                                                                                                                                                                                                                                                                                                                                                                                                                                                                                                                                                                                                                                                                                                                                                                                                                                                                                                                                                                                                                                                                                                                                                                                                                                                                                                                                                                                                                                                                                                                                                                                                                                                                                                                                                                                                                                                                                                                                                                                                                                                                |
| Article Type:                 | Protocol                                                                                                                                                                                                                                                                                                                                                                                                                                                                                                                                                                                                                                                                                                                                                                                                                                                                                                                                                                                                                                                                                                                                                                                                                                                                                                                                                                                                                                                                                                                                                                                                                                                                                                                                                                                                                                                                                                                                                                                                                                                                                                                                                                                                                                                                                                                                              |
| Date Submitted by the Author: | 10-May-2017                                                                                                                                                                                                                                                                                                                                                                                                                                                                                                                                                                                                                                                                                                                                                                                                                                                                                                                                                                                                                                                                                                                                                                                                                                                                                                                                                                                                                                                                                                                                                                                                                                                                                                                                                                                                                                                                                                                                                                                                                                                                                                                                                                                                                                                                                                                                           |
| Complete List of Authors:     | <p>Darton, Thomas; Oxford University Clinical Research Unit; University of Sheffield Department of Infection and Immunity</p> <p>Meiring, James; University of Oxford, Oxford Vaccine Group, Paediatrics</p> <p>Tonks, Susan; Oxford Vaccine Group, Department of Paediatrics</p> <p>Khan, Md Arifuzzaman; International Centre for Diarrhoeal Disease Research</p> <p>Khanam, Farhana; International Centre for Diarrhoeal Disease Research</p> <p>Shakya, Mila; Patan Academy of Health Sciences, Oxford University Clinical Research Unit</p> <p>Thindwa, Deus; University of Malawi College of Medicine, Malawi Liverpool Wellcome Trust Clinical Research Programme</p> <p>Baker, Stephen; Oxford University Clinical Research Unit, The Hospital for Tropical Diseases, Wellcome Trust Major Overseas Programme; Nuffield Department of Clinical Medicine, Centre for Tropical Medicine and Global Health</p> <p>Basnyat, Buddha; Patan Academy of Health Sciences, Oxford University Clinical Research Unit; Nuffield Department of Clinical Medicine, Centre for Tropical Medicine and Global Health</p> <p>Clemens, John; International Centre for Diarrhoeal Disease Research; University of California Los Angeles Jonathan and Karin Fielding School of Public Health</p> <p>Dougan, Gordon; Wellcome Trust Sanger Institute</p> <p>Dolecek, Christiane; Mahidol University, Mahidol-Oxford Tropical Medicine Research Unit, Faculty of Tropical Medicine; Nuffield Department of Clinical Medicine, Centre for Tropical Medicine and Global Health</p> <p>Dunstan, Sarah; University of Melbourne, The Peter Doherty Institute for Infection and Immunity</p> <p>Gordon, Melita; University of Malawi College of Medicine, Malawi Liverpool Wellcome Trust Clinical Research Programme; University of Liverpool, Institute of Infection and Global Health</p> <p>Heyderman, Robert; University College London, Division of Infection and Immunity; University of Malawi College of Medicine, Malawi Liverpool Wellcome Trust Clinical Research Programme</p> <p>Holt, Kathryn; University of Melbourne, Centre for Systems Genomics; University of Melbourne, Department of Biochemistry and Molecular Biology</p> <p>Pitzer, Virginia E.; Yale Univ, Department of Epidemiology of Microbial Diseases, Yale School of Public Health</p> |

|                                    |                                                                                                                                                                                                                                                      |
|------------------------------------|------------------------------------------------------------------------------------------------------------------------------------------------------------------------------------------------------------------------------------------------------|
|                                    | Qadri, Firdausi ; International Centre for Diarrhoeal Disease Research Zaman, K; International Centre for Diarrhoeal Disease Research, Bangladesh (icddr,b), Centre for Equity and Health Systems Pollard, Andrew; University of Oxford, Paediatrics |
| <b>Primary Subject Heading</b> :   | Infectious diseases                                                                                                                                                                                                                                  |
| <b>Secondary Subject Heading</b> : | Epidemiology, Global health, Diagnostics                                                                                                                                                                                                             |
| <b>Keywords</b> :                  | Diagnostic microbiology < INFECTIOUS DISEASES, Epidemiology < INFECTIOUS DISEASES, Paediatric infectious disease & immunisation < PAEDIATRICS, Tropical medicine < INFECTIOUS DISEASES                                                               |
|                                    |                                                                                                                                                                                                                                                      |

SCHOLARONE™  
Manuscripts

1  
2  
3  
4  
5  
6  
7  
8  
9  
10  
11  
12  
13  
14  
15  
16  
17  
18  
19  
20  
21  
22  
23  
24  
25  
26  
27  
28  
29  
30  
31  
32  
33  
34  
35  
36  
37  
38  
39  
40  
41  
42  
43  
44  
45  
46  
47  
48  
49  
50  
51  
52  
53  
54  
55  
56  
57  
58  
59  
60

1           **THE STRATAA STUDY PROTOCOL: A PROGRAMME TO ASSESS THE**  
2           **BURDEN OF ENTERIC FEVER IN BANGLADESH, MALAWI AND NEPAL USING**  
3           **PROSPECTIVE POPULATION CENSUS, PASSIVE SURVEILLANCE,**  
4           **SEROLOGICAL STUDIES AND HEALTHCARE UTILISATION SURVEYS**

6           **Short title: The STRATAA study**

7           **Authors:** Thomas C. Darton,<sup>1,2,3,\*</sup> James E. Meiring,<sup>2,\*†</sup> Susan Tonks,<sup>2</sup> Md  
8           Arifuzzaman Khan,<sup>4</sup> Farhana Khanam,<sup>4</sup> Mila Shakya,<sup>5</sup> Deus Thindwa,<sup>6</sup> Stephen  
9           Baker,<sup>1,7,8</sup> Buddha Basnyat,<sup>5,7</sup> John D. Clemens,<sup>4,9</sup> Gordon Dougan,<sup>8</sup> Christiane  
10          Dolecek,<sup>7, 10</sup> Sarah J. Dunstan,<sup>11</sup> Melita A. Gordon,<sup>6,12</sup> Robert S. Heyderman,<sup>6,13</sup>  
11          Kathryn E. Holt,<sup>14,15</sup> Virginia E. Pitzer,<sup>16</sup> Firdausi Qadri,<sup>4</sup> K. Zaman,<sup>4</sup> and Andrew J.  
12          Pollard,<sup>2</sup> on behalf of the STRATAA Study Consortium

13          **Affiliations:**

- 14           1. The Hospital for Tropical Diseases, Wellcome Trust Major Overseas  
15           Programme, Oxford University Clinical Research Unit, Ho Chi Minh City,  
16           Vietnam;
- 17           2. Oxford Vaccine Group, Department of Paediatrics, University of Oxford, and  
18           the NIHR Oxford Biomedical Research Centre, Oxford, United Kingdom;
- 19           3. Department of Infection, Immunity and Cardiovascular Disease, University of  
20           Sheffield Medical School, United Kingdom;
- 21           4. International Centre for Diarrhoeal Diseases Research, Bangladesh (icDDR,b),  
22           Dhaka, Bangladesh;
- 23           5. Oxford University Clinical Research Unit, Patan Academy of Health Sciences,  
24           Kathmandu, Nepal;
- 25           6. Malawi Liverpool Wellcome Trust Clinical Research Programme, University of  
26           Malawi College of Medicine, Blantyre, Malawi;
- 27           7. Centre for Tropical Medicine and Global Health, Nuffield Department of  
28           Medicine, University of Oxford, United Kingdom;



- 1  
2  
3 29 8. The Wellcome Trust Sanger Institute, Hinxton, Cambridgeshire, United  
4  
5 30 Kingdom;  
6  
7 31 9. UCLA Fielding School of Public Health, Los Angeles, United States of  
8  
9 32 America;  
10  
11 33 10. Mahidol-Oxford Tropical Medicine Research Unit, Faculty of Tropical  
12  
13 34 Medicine, Mahidol University, Bangkok, Thailand;  
14  
15 35 11. The Peter Doherty Institute for Infection and Immunity, The University of  
16  
17 36 Melbourne, Melbourne, Australia;  
18  
19 37 12. Institute of Infection and Global Health, University of Liverpool, Liverpool,  
20  
21 38 United Kingdom;  
22  
23 39 13. Division of Infection and Immunity, University College London, London,  
24  
25 40 United Kingdom;  
26  
27 41 14. Centre for Systems Genomics, University of Melbourne, Parkville, Victoria,  
28  
29 42 Australia;  
30  
31 43 15. Department of Biochemistry and Molecular Biology, University of Melbourne,  
32  
33 44 Parkville, Victoria, Australia;  
34  
35 45 16. Department of Epidemiology of Microbial Diseases, Yale School of Public  
36  
37 46 Health, Yale University, New Haven, Connecticut, United States of America  
38  
39  
40  
41  
42

43 \* Contributed equally

44 **Corresponding Author:** Dr James Meiring, Oxford Vaccine Group, Department of  
45  
46 Paediatrics, University of Oxford, and the NIHR Oxford Biomedical Research Centre,  
47  
48 Oxford, United Kingdom.

49 Email: james.meiring@paediatrics.ox.ac.uk

50  
51  
52 **Consortium members:**

53  
54 Abhilasha Karkey, Sabina Dongol, Amit Aryjal (Oxford University Clinical Research  
55  
56 Unit, Patan Academy of Health Sciences, Kathmandu, Nepal);  
57  
58  
59  
60

1  
2  
3 56 Nirod Chandra Saha (International Center for Diarrhoeal Diseases Research, Dhaka,  
4  
5 57 Bangladesh)  
6  
7 58 Tikhala Makhaza Jere, Chisomo Msefula, Tonney Nyirenda (University of Liverpool,  
8  
9 59 United Kingdom and the Malawi Liverpool Wellcome Trust Clinical Research  
10  
11 60 Programme, Malawi)  
12  
13 61 Tan Trinh Van (The Hospital for Tropical Diseases, Wellcome Trust Major Overseas  
14  
15 62 Programme, Oxford University Clinical Research Unit, Ho Chi Minh City, Vietnam)  
16  
17 63 Stephen Reece (Wellcome Trust Sanger Institute, Cambridge, United Kingdom)  
18  
19 64 Merryn Voysey, Christoph J. Blohmke, Yama Farooq, Jennifer Hill  
20  
21 65 (Oxford Vaccine Group, Department of Paediatrics, University of Oxford, and the  
22  
23 66 NIHR Oxford Biomedical Research Centre, Oxford, United Kingdom)  
24  
25 67 Neil J. Saad (Yale School of Public Health, Yale University, New Haven, Connecticut,  
26  
27 68 United States of America)  
28  
29 69  
30  
31  
32  
33  
34  
35  
36  
37  
38  
39  
40  
41  
42  
43  
44  
45  
46  
47  
48  
49  
50  
51  
52  
53  
54  
55  
56  
57  
58  
59  
60

1  
2  
3 70 **ABSTRACT**  
4

5 71 **Introduction**  
6

7 72 Invasive infections caused by *Salmonella enterica* serovar Typhi and Paratyphi A are  
8  
9 73 estimated to account for 12-27 million febrile illness episodes worldwide annually.  
10

11 74 Determining the true burden of typhoidal *Salmonellae* infections is hindered by lack  
12  
13 75 of population-based studies and adequate laboratory diagnostics.  
14

15 76 The STRATAA (Strategic Typhoid alliance across Africa and Asia) study takes a  
16  
17 77 systematic approach to measuring the age-stratified burden of clinical and subclinical  
18  
19 78 disease caused by typhoidal *Salmonellae* infections at three high-incidence urban  
20  
21 79 sites in Africa and Asia. We aim to explore the natural history of *Salmonella*  
22  
23 80 transmission in endemic settings, addressing key uncertainties relating to the  
24  
25 81 epidemiology of enteric fever identified through mathematical models, and enabling  
26  
27 82 optimisation of vaccine strategies.  
28

29 83 **Methods/Design**  
30

31 84 Using census-defined denominator populations of  $\geq 100,000$  individuals at sites in  
32  
33 85 Malawi, Bangladesh and Nepal, the primary outcome is to characterize the burden of  
34  
35 86 enteric fever in these populations over a 24-month period. During passive  
36  
37 87 surveillance, clinical and household data, and laboratory samples will be collected  
38  
39 88 from febrile individuals. In parallel, healthcare utilization and water, sanitation and  
40  
41 89 hygiene surveys will be performed to characterise healthcare-seeking behaviour and  
42  
43 90 assess potential routes of transmission. The rates of both undiagnosed and  
44  
45 91 subclinical exposure to typhoidal *Salmonellae* (seroincidence), identification of  
46  
47 92 chronic carriage, and population seroprevalence of typhoid infection will be assessed  
48  
49 93 through, age-stratified serosurveys performed at each site. Secondary attack rates  
50  
51 94 will be estimated among household contacts of acute enteric fever cases and  
52  
53 95 possible chronic carriers.  
54

55 96 **Ethics and Dissemination**  
56  
57  
58  
59  
60

1  
2  
3 97 This protocol has been ethically approved by the Oxford Tropical Research Ethics  
4  
5 98 Committee, the icddr, Institutional Review Board, the Malawian National Health  
6  
7 99 Sciences Research Committee and College of Medicine Research Ethics Committee  
8  
9 100 and Nepal Health Research Council. The study is being conducted in accordance  
10  
11 101 with the principles of the Declaration of Helsinki and Good Clinical Practice. Informed  
12  
13 102 consent is obtained before study enrolment. Results will be submitted to international  
14  
15 103 peer-reviewed journals and presented at international conferences.  
16  
17 104

## 19 105 **STRENGTHS AND LIMITATIONS**

20  
21 106 - The study is designed with a comprehensive multicomponent epidemiological  
22  
23 107 approach, nesting passive surveillance, serosurveillance and healthcare utilisation  
24  
25 108 surveys within a demographic census population, to accurately determine the age-  
26  
27 109 stratified burden of enteric fever.  
28  
29 110 - The diversity of field sites in Africa and Asia, will provide data on typhoid  
30  
31 111 epidemiology and transmission from a range of differing epidemiological settings.  
32  
33 112 - The combination of a traditional epidemiological approach with novel laboratory  
34  
35 113 methods for the diagnosis of febrile illness and investigation of the host and  
36  
37 114 pathogen genetics and antimicrobial resistance determinants provides a unique  
38  
39 115 platform to study this disease.  
40  
41 116 - Practical limitations include the sharing and standardisation of clinical definitions,  
42  
43 117 data and sample collection methods and laboratory assays, based on the facilities  
44  
45 118 and staff available and community requirements at each site.  
46  
47 119 - The number of field-sites included in this current protocol is limited to three; all of  
48  
49 120 these sites are densely populated urban settings with likely high-incidence of enteric  
50  
51 121 fever transmission. The degree to which our data may be extrapolated to other  
52  
53 122 settings and countries remains to be explored.  
54  
55  
56  
57  
58  
59  
60

1  
2  
3 125 **Registration:** ISRCTN 12131979  
4  
5 126 **Ethics References:** Oxford (Oxford Tropical Research Ethics Committee 39-15)  
6  
7 127 Bangladesh (icddr,b Institutional Review Board PR-15119 )  
8  
9 128 Malawi (National Health Sciences Research Committee  
10  
11 129 15/5/1599)  
12  
13 130 Nepal (Nepal Health Research Council 306/2015)  
14  
15 131  
16  
17 132 **Keywords:**  
18  
19 133 Enteric fever, vaccination programme, infection transmission, *Salmonella* Typhi,  
20  
21 134 *Salmonella* Paratyphi A, serosurveillance, seroepidemiology, healthcare utilisation,  
22  
23 135 resource-limited settings; diagnosis; febrile illness; Africa, Asia.  
24  
25  
26  
27  
28  
29  
30  
31  
32  
33  
34  
35  
36  
37  
38  
39  
40  
41  
42  
43  
44  
45  
46  
47  
48  
49  
50  
51  
52  
53  
54  
55  
56  
57  
58  
59  
60

1  
2  
3 136 **BACKGROUND**

4  
5 137 *Salmonella enterica* serovars Typhi (S. Typhi) and Paratyphi A (S. Paratyphi A), are  
6  
7 138 human-restricted pathogens transmitted by faeco-oral ingestion. The ensuing  
8  
9 139 disease, enteric fever (or 'typhoid fever'), is a non-specific febrile illness which affects  
10  
11 140 an estimated 12-27 million people worldwide each year, resulting in 129,000–  
12  
13 141 223,000 deaths.<sup>1–3</sup> Despite a dramatic reduction in incidence over the last century in  
14  
15 142 most high-income countries, continuing inadequate access to clean water and  
16  
17 143 increasing inter-continental spread of multiply antibiotic-resistant strains hamper  
18  
19 144 disease control efforts especially in resource-limited settings.<sup>3–5</sup> The current burden  
20  
21 145 of disease is highest among children and young adults in South and Southeast Asia<sup>1–</sup>  
22  
23 146 <sup>3</sup> but is increasingly recognized in sub-Saharan Africa.<sup>6</sup>

24  
25 147  
26  
27 148 Recently, a new generation of Vi- conjugate enteric fever vaccines, suitable for use in  
28  
29 149 infants and providing longer lasting protection than those previously licensed,<sup>7–10</sup>  
30  
31 150 have become available. Determining how and where interventions such as  
32  
33 151 vaccination may be best deployed is difficult due to a lack of population-based  
34  
35 152 incidence studies and inaccurate diagnostic tests.<sup>1–3</sup> Improving disease burden  
36  
37 153 estimates and providing data on the epidemiology and transmission of S. Typhi and  
38  
39 154 S. Paratyphi A to inform mathematical models<sup>11–13</sup> could improve the evidence  
40  
41 155 necessary to design comprehensive and effective disease control programmes.<sup>14</sup>

42  
43 156

44  
45 157 **Burden of disease and diagnostics**

46  
47 158 Recent meta-analyses examining global causes of morbidity and mortality estimate  
48  
49 159 that a significant burden of disease worldwide, and especially in South and  
50  
51 160 Southeast Asia, may be attributed to enteric fever.<sup>15–17</sup> The margin of error on these  
52  
53 161 estimates is wide, however; much of the uncertainty regarding the burden of disease  
54  
55 162 caused by typhoidal *Salmonella* is due to the unavailability of accurate diagnostics or  
56  
57 163 misclassification of non-specific disease presentations, in addition to a general lack  
58  
59  
60

1  
2  
3 164 of data.<sup>18</sup> Availability of antibiotics from local pharmacies without prescription,  
4  
5 165 frequent misdiagnosis as malaria, dengue or other febrile illnesses, or the avoidance  
6  
7 166 of hospital due to fear or expense are all likely to result in an underestimate of the  
8  
9 167 true numbers of cases.<sup>19</sup> In contrast, the widespread use of suboptimal diagnostic  
10  
11 168 tests such as the Widal test in areas where exposure to similar bacteria in the  
12  
13 169 environment occurs may lead to inaccurate over-diagnosis of the condition.<sup>20</sup>  
14  
15 170 Previous studies and systematic reviews have attempted to address this inaccuracy  
16  
17 171 by calculating the imprecision associated with insensitive blood culture methods, and  
18  
19 172 applying this correction to blood culture confirmed case numbers.<sup>1,2</sup>  
20  
21 173  
22  
23 174 In addition to a better understanding of the disease burden attributable to typhoidal  
24  
25 175 *Salmonellae*, improved diagnostics and biomarkers are required to improve individual  
26  
27 176 case management.<sup>21</sup> The current gold-standard diagnostic test for  
28  
29 177 typhoid/paratyphoid is blood culture; while this test provides the causative isolate,  
30  
31 178 thereby allowing susceptibility testing and further typing methods to be performed,  
32  
33 179 most laboratories in resource-limited settings lack the infrastructure to perform these  
34  
35 180 assays. Even in ideal conditions, blood culture requires a significant volume of blood  
36  
37 181 to enhance diagnostic yield, and is relatively insensitive even in highly-controlled  
38  
39 182 human challenge settings where sensitivity reaches 80%.<sup>22</sup> Highly sensitive and  
40  
41 183 specific diagnostic tests are a fundamental requirement for surveillance and vaccine  
42  
43 184 efficacy studies, however, both for measuring the number of cases  
44  
45 185 avoided/prevented, but also for reassuring policy makers and funders that vaccine  
46  
47 186 implementation is worth investment. While several rapid serological diagnostic tests  
48  
49 187 have recently been developed, these still rely on a few selected antigens, which are  
50  
51 188 known to be non-specific in endemic communities.<sup>23,24</sup> Newer diagnostic modalities  
52  
53 189 are in development, however, which have utilised serum banks from multiple  
54  
55 190 countries and samples collected from controlled human infection models to identify  
56  
57 191 putative novel antigens for serological assay and further high sensitivity approaches  
58  
59  
60

1  
2  
3 192 including metabolomics and functional genomics.<sup>5,25-27</sup> In addition, several of these  
4  
5 193 newer approaches have demonstrated potential for identifying individuals with  
6  
7 194 probable chronic carriage. Identification and treatment of chronic carriers in a  
8  
9 195 population would significantly improve our understanding of disease dynamics and  
10  
11 196 allow targeted treatment strategies to reduce community transmission of infection.  
12

13  
14  
15 198 Furthermore, whilst utilising these new diagnostic tests in comprehensive passive  
16  
17 199 surveillance or even active surveillance programmes will identify acute cases of  
18  
19 200 typhoid disease, the incidence rate of sub-clinical infection and exposure is unknown.  
20  
21 201 These data are likely essential to understanding pathogen transmission as well as  
22  
23 202 the development and maintenance of immunity against clinical disease<sup>12</sup> and are  
24  
25 203 likely only to be obtainable through the use of seroepidemiological methods.

26  
27 204 Previous seroepidemiological studies have examined the cross-sectional age-  
28  
29 205 stratified prevalence of antibodies to the *S. Typhi* flagellar (H) antigen in Santiago,  
30  
31 206 Chile<sup>28</sup>, and serum bactericidal antibody in Kathmandu, Nepal.<sup>29</sup> Also, high antibody  
32  
33 207 titres to the Vi (Vi capsular polysaccharide; virulence factor) antigen of *S. Typhi*  
34  
35 208 measured by agglutination assay have been used to estimate chronic carrier  
36  
37 209 frequency in population-based studies,<sup>30-32</sup> although these studies were not  
38  
39 210 universally successful at identifying chronic carriers.<sup>33</sup> Improvements in serological  
40  
41 211 assays and the discovery of a newer generation of diagnostic antigens<sup>34</sup> suggest that  
42  
43 212 population-based serosurveillance studies, especially using longitudinal  
44  
45 213 measurements, may provide key data regarding the incidence of subclinical infection  
46  
47 214 with the bacterial agents of enteric fever and the prevalence of chronic carriers.

48  
49  
50 215

## 51 216 **Transmission**

52  
53 217 Closely related to the estimate of incidence is the contribution of different typhoid  
54  
55 218 states to ongoing transmission within a community. Acute cases of enteric fever,  
56  
57 219 individuals with subclinical infection, as well as chronic carriers likely all contribute to  
58  
59  
60



1  
2  
3 220 the transmission and maintenance of *S. Typhi* and *S. Paratyphi A* in endemic areas,  
4  
5 221 but not to the same degree. This is an essential area of further research, particularly  
6  
7 222 given the negative impact transmission from chronic carriers could have on the  
8  
9 223 indirect protection afforded by typhoid vaccines.<sup>12</sup> The importance of 'short cycle'  
10  
11 224 transmission via contaminated food and water in the immediate environment versus  
12  
13 225 'long cycle' transmission via the contamination of community water sources is also  
14  
15 226 an area of direct relevance in the control of typhoid fever, primarily through non-  
16  
17 227 vaccine public health interventions including water and sanitation hygiene (WASH)  
18  
19 228 improvements.  
20

21 229

### 23 230 **Bacterial genome variation**

25 231 The enteric fever agents *S. Typhi* and *S. Paratyphi A*, while genetically distinct from  
26  
27 232 other serovars of *Salmonella enterica*, exhibit low genetic diversity and whole  
28  
29 233 genome sequence (WGS) analysis is required to uncover patterns of genetic  
30  
31 234 relatedness between isolates.<sup>35-37</sup> These techniques have been used previously to  
32  
33 235 track the development and spread of antibiotic resistance on a global scale,<sup>6</sup> and  
34  
35 236 have shown potential to accurately track transmission links between individuals,  
36  
37 237 specifically within affected households, in addition to the broader community.<sup>38</sup> One  
38  
39 238 use of this high-resolution typing previously, has been to determine whether isolates  
40  
41 239 obtained from those with acute infection are distinct from those found in chronic gall-  
42  
43 240 bladder carriers.<sup>39</sup>

44 241

### 47 242 **Host susceptibility**

49 243 While environmental risk factors for enteric fever acquisition are thought to be  
50  
51 244 relatively well understood, recent evidence has emerged implicating genetic factors  
52  
53 245 in host susceptibility to infection.<sup>35,36</sup> Many early typhoid genetic susceptibility studies  
54  
55 246 reporting candidate genes were limited by small sample sizes and choice of controls,  
56  
57 247 a recent large-scale genome-wide association study however, has identified a  
58  
59  
60

1  
2  
3 248 specific locus (HLA-DRB1\*405) which confers 5-fold protection against developing  
4  
5 249 typhoid fever.<sup>35</sup> How genetic variation at this site influences protection against  
6  
7 250 typhoid is still under investigation, but may result in functional differences in MHC  
8  
9 251 class II amino acid sequences; in turn, this may influence *S. Typhi* epitope selection  
10  
11 252 and antigen presentation or the scale and format of the host's T-cell response.  
12  
13 253

## 14 254 **Vaccines**

15  
16  
17 255 Vaccines currently available for typhoid are either oral live attenuated bacterial  
18  
19 256 strains or are derived from the *S. Typhi* polysaccharide capsule, called Vi; there are  
20  
21 257 no licensed vaccines against *S. Paratyphi A* or non-typhoidal salmonellae (NTS).  
22  
23 258 Despite recommendations for their use, these vaccines have only sparsely been  
24  
25 259 introduced in high prevalence settings.<sup>7,40</sup> The reasons for this are unclear, but likely  
26  
27 260 include failure of prioritisation and a short fall in advocacy, in addition to technical  
28  
29 261 deficiencies of the vaccines themselves. One common reason cited is the T-cell  
30  
31 262 independent nature of the immune response to the Vi polysaccharide vaccine (ViPS);  
32  
33 263 this renders the vaccine of little use in young children below the age of two years. In  
34  
35 264 addition, this feature means that the immune response does not boost, requiring  
36  
37 265 repeat vaccination to be administered every 3-5 years. As with other thymus-  
38  
39 266 independent vaccines, to overcome this problem the Vi capsule may be chemically  
40  
41 267 conjugated to a protein carrier,<sup>8</sup> as has successfully been done with conjugation of Vi  
42  
43 268 to *Pseudomonas aeruginosa* exotoxin A.<sup>9</sup> Despite demonstrating good  
44  
45 269 immunogenicity and efficacy in field trials,<sup>10,41</sup> the vaccine is still unlicensed. Newer  
46  
47 270 Vi-conjugate vaccines are in development and have progressed to assessment in  
48  
49 271 field-trials,<sup>42,43</sup> and the Oxford human typhoid challenge model.<sup>44</sup> Recent data from  
50  
51 272 the challenge models suggests that the Vi response elicited by the vaccine is high  
52  
53 273 and likely to be protective, at least in naïve healthy adult volunteers with no immunity  
54  
55 274 or those with previous history of infection.<sup>44</sup> Furthermore, a recent study in Indian  
56  
57 275 schoolchildren found a vaccine efficacy of 100% (95% confidence interval, 97.6 to  
58  
59  
60

1  
2  
3 276 100%) after a single dose of Vi conjugated to tetanus toxoid during the first year of  
4  
5 277 follow-up.<sup>43</sup>  
6

7 278  
8  
9 279 The key issue remaining, once safe, well-tolerated, immunogenic vaccines become  
10  
11 280 widely available, is how best to implement them in endemic settings. Currently  
12  
13 281 available surveillance data from most regions is insufficient to demonstrate the age-  
14  
15 282 band with the highest incidence of enteric fever.<sup>45</sup> Designing vaccination strategies to  
16  
17 283 cover the years during which children are most at risk and generating indirect  
18  
19 284 protection by preventing infection among those age groups driving transmission  
20  
21 285 could be facilitated through the use of well-informed mathematical modelling.  
22  
23 286

### 24 25 287 **THE STRATAA STUDY: RATIONALE AND AIMS**

26  
27 288 The STRATAA (Strategic Typhoid alliance across Africa and Asia) study draws  
28  
29 289 together an international team of investigators, field sites, laboratories and research  
30  
31 290 institutes to address many of the key outstanding questions described above  
32  
33 291 regarding the burden of enteric fever and *Salmonella* exposure in endemic regions,  
34  
35 292 the mechanisms of susceptibility and infection transmission. These have been  
36  
37 293 identified as key uncertainties in mathematical models.<sup>11-13</sup> By conducting field  
38  
39 294 studies of the epidemiology and burden of enteric fever across three sites with  
40  
41 295 distinct epidemiological profiles and applying state-of-the-art molecular methods, the  
42  
43 296 goal of the STRATAA study is to collect the data needed to enhance our  
44  
45 297 understanding of pathogen transmission, exposure and susceptibility. These data  
46  
47 298 can then be used to rigorously parameterize and validate models for the transmission  
48  
49 299 dynamics of the agents of enteric fever, such that these models can then be used to  
50  
51 300 evaluate different vaccination strategies and, importantly, help predict the expected  
52  
53 301 impact resulting from the direct and indirect effects of vaccine introduction. These  
54  
55 302 and other overarching objectives of the STRATAA study are listed in **Table 1**.  
56  
57  
58 303

304 **Table 1. Overarching objectives of the STRATAA study.**

|                            |                                                                                                            |
|----------------------------|------------------------------------------------------------------------------------------------------------|
| <b>Primary</b>             | To characterise the burden of enteric fever at three urban sites in Africa and Asia                        |
| <b>Secondary</b>           | Assess the burden/incidence of enteric fever                                                               |
|                            | Assess the seroincidence of infection                                                                      |
|                            | Assess host factors affecting burden/incidence/transmission of enteric fever                               |
|                            | Assess effect of pathogen genetics on burden/incidence/transmission of enteric fever                       |
|                            | Develop diagnostic tools for rapid and consistent typhoid diagnosis                                        |
|                            | Develop transmission modelling and modelling of vaccine introduction impact                                |
| <b>Tertiary Objectives</b> | Strengthen research capacity in enteric fever endemic regions                                              |
|                            | Provide data to appropriate institutes and governments to advocate vaccine implementation                  |
|                            | To characterise the burden of invasive NTS and other invasive pathogens at an urban site in Malawi, Africa |

305

306 To deliver on these objectives, the following studies will be performed in parallel at  
 307 each of the three chosen field sites, starting in May 2016 with activities continuing  
 308 until October 2018. Firstly, in a well-defined population catchment of  
 309 approximately 100,000 individuals, a detailed demographic census survey will be  
 310 undertaken. Secondly, in healthcare facilities utilised by the census population (as  
 311 confirmed through a healthcare utilisation survey) prospective passive surveillance to  
 312 detect cases of enteric fever will be performed. Thirdly, a seroincidence study will be

1  
2  
3 313 conducted in an age-stratified sample of the census population at each site,  
4  
5 314 collecting blood samples at intervals to estimate the rate of seroconversion to  
6  
7 315 typhoidal *Salmonella* antigens and hence the rate of subclinical/asymptomatic  
8  
9 316 exposure to these bacteria in the general population.  
10

11 317  
12  
13 318 To meet the further objectives, which include evaluating diagnostic tests, identifying  
14  
15 319 antimicrobial resistance patterns, exploring host susceptibility and bacterial  
16  
17 320 virulence/genomic variation, biological samples, specimens and metadata will be  
18  
19 321 collected during these individual studies. Data will be pooled to inform transmission  
20  
21 322 dynamic and health economic models that can be used to help design future vaccine  
22  
23 323 effectiveness studies and evaluate vaccine delivery strategies for widespread  
24  
25 324 deployment.  
26

27 325  
28

## 29 326 **STUDY SITES**

30  
31 327 With known high incidence throughout South and Southeast Asia and a recent  
32  
33 328 increase in reported cases from sub-Saharan Africa<sup>46,47</sup> three sites were selected  
34  
35 329 from across Africa and Asia based on known high rates of enteric fever and the  
36  
37 330 research capacity to deliver a study of this size and logistical complexity. The three  
38  
39 331 sites differ in their epidemiological profiles and history of enteric fever incidence.  
40

41 332

### 42 333 ***Dhaka, Bangladesh***

43  
44 334 Mirpur is an area located within Dhaka Metropolitan area, Bangladesh (**Figure 1A**),  
45  
46 335 situated 7km north-west of the International Centre for Diarrhoeal Disease Research,  
47  
48 336 Bangladesh (icddr,b) main campus. The icddr,b manages two hospitals in Dhaka  
49  
50 337 city, one in the main campus in Dhaka (the main hospital) and another in the Mirpur  
51  
52 338 area known as MTC (Mirpur Treatment Centre) comprising a 50-bed inpatient facility.  
53  
54 339 As part of this programme, these and other health facilities (ten or more total) will be  
55  
56 340 kept under careful surveillance for enteric fever in the census area. The total  
57  
58  
59  
60

1  
2  
3 341 catchment area for the field site for the STRATAA study is 10.79 km<sup>2</sup> with a total  
4  
5 342 population of about 603,658 at a density of 55946/km<sup>2</sup>. Approximately 98% of  
6  
7 343 residents have access to tap water supplied by the municipality while the remainder  
8  
9 344 use wells, hand pumps and other sources such as ponds and rivers in the study  
10  
11 345 area.

12  
13 346  
14  
15 347 Previous data from blood culture surveillance revealed a high incidence of disease  
16  
17 348 within Dhaka, with the burden particularly high in children under 5 years of age  
18  
19 349 (estimated at 18.7 episodes/1000 person-years in this age group). The current S.  
20  
21 350 Typhi:Paratyphi ratio is approximately 5:1. Typhoid fever is reported throughout the  
22  
23 351 year but peaks during the monsoon season.<sup>48,49</sup> Of note, 15% of S. Typhi isolates are  
24  
25 352 multi-drug resistant (MDR) and around 97% isolates are resistant to nalidixic acid<sup>50</sup>;  
26  
27 353 extended-spectrum beta-lactamase (ESBL) producing organisms have also been  
28  
29 354 isolated from enteric fever patients in this setting.

30  
31 355  
32  
33 356 ***Blantyre, Malawi***

34  
35 357 Ndirande is a large urban township on the outskirts of Blantyre city, Malawi, 6km  
36  
37 358 from the main referral hospital (**Figure 1B**). It has a young population of around  
38  
39 359 100,000 people spread over 6.77km<sup>2</sup>. It is serviced by one health clinic staffed by  
40  
41 360 clinical officers. It has high reported rates of typhoid fever along with a population  
42  
43 361 HIV prevalence of around 18%.<sup>51</sup> Queen Elizabeth Central Hospital (QECH) in  
44  
45 362 Blantyre, Malawi, is the government-funded hospital for Blantyre district, serving a  
46  
47 363 local population of 1.3 million persons and provides tertiary care to southern Malawi.

48  
49 364  
50  
51 365 NTS have previously been the commonest cause of invasive bloodstream infections  
52  
53 366 in Blantyre,<sup>52</sup> but since 2011 there has been a rapid increase in the number of S.  
54  
55 367 Typhi cases seen at QECH, from approximately 14/year between 1998 and 2010 to  
56  
57 368 782 in 2014.<sup>46</sup> Much of this increase has been due to the emergence of the H58

1  
2  
3 369 clone and is associated with an MDR phenotype<sup>47,53</sup>. This outbreak appears  
4  
5 370 unrelated to HIV-infection, but has resulted in high rates of mortality (2.5% adult and  
6  
7 371 paediatric) despite the availability of fluoroquinolone antibiotics.<sup>47</sup> In this setting,  
8  
9 372 enteric fever is seasonal, with the peak number of cases seen at the end of the wet  
10  
11 373 season and during the early dry season when the prevalence of malnutrition is also  
12  
13 374 highest.

14  
15 375  
16  
17 376 ***Patan, Nepal***

18  
19 377 Patan is located within the Lalitpur Sub-Metropolitan City (LSMC) within the  
20  
21 378 Kathmandu Valley, Nepal (**Figure 1C**). The population is generally poor, with most  
22  
23 379 living in overcrowded conditions and obtaining their water from stone spouts or  
24  
25 380 sunken wells. Patan Hospital is a 318-bed government hospital providing emergency  
26  
27 381 and elective outpatient and inpatient services to this area. The local catchment  
28  
29 382 population of the hospital is approximately 200,000 people in about 20 km<sup>2</sup>, with a  
30  
31 383 population density of 8,000/km<sup>2</sup>; there is a high rate of immigration for employment,  
32  
33 384 particularly young males from rural areas. Enteric fever is frequently managed in the  
34  
35 385 outpatient clinic at Patan Hospital, which has approximately 200,000 outpatient visits  
36  
37 386 annually.

38  
39 387  
40  
41 388 Uptake of typhoid Vi vaccination is limited and natural exposure/subclinical infection  
42  
43 389 is common.<sup>29</sup> Approximately 400 culture confirmed cases of enteric fever are  
44  
45 390 diagnosed at Patan Hospital each year, with a peak during the monsoon months. The  
46  
47 391 current *S. Typhi*:*Paratyphi A* ratio is approximately 1:1.<sup>54</sup> Antimicrobial resistance is  
48  
49 392 more commonly observed in *S. Paratyphi A* isolates; however, emergence of  
50  
51 393 fluoroquinolone resistant *S. Typhi* isolates has also been recently identified,<sup>55</sup>  
52  
53 394 whereas MDR strains of either serovar are rare.<sup>38</sup>

54  
55  
56 395

1  
2  
3 396 **METHODS**  
4

5 397 **POPULATION CENSUS**  
6

7 398 In order to accurately calculate an incidence rate of typhoid fever for each of the  
8  
9 399 study sites, a demographic census will be performed at baseline and repeated at 2  
10  
11 400 years. The objective of the census is to identify/characterise the source population  
12  
13 401 corresponding to the catchment areas for the passive surveillance sites described  
14  
15 402 below, and estimate the person-time under surveillance.  
16

17 403

18  
19 404 Census data will be updated with births, deaths and migrations every six months in  
20  
21 405 Dhaka and Patan, and at two years in Blantyre. The number of participants for the  
22  
23 406 demographic census survey in each site needed to produce a two-sided 95%  
24  
25 407 confidence interval with a precision (half-width) of 50% for the anticipated typhoid  
26  
27 408 incidence rate detected through passive clinical surveillance has been calculated  
28  
29 409 (**Table 2**). The necessary catchment population size is driven by the size required to  
30  
31 410 estimate the expected incidence rate in the 0-4 year-old age group, which is  
32  
33 411 estimated to be approximately 10% of the total population in each site.  
34

35 412

36 413  
37  
38  
39  
40  
41  
42  
43  
44  
45  
46  
47  
48  
49  
50  
51  
52  
53  
54  
55  
56  
57  
58  
59  
60



414 **Table 2. Sample size required for the target populations in the three sites to**  
 415 **estimate annual, blood culture-confirmed typhoid incidence in passive clinical**  
 416 **surveillance.**

| Age groups | Anticipated typhoid incidence per 1000 persons* | Precision or half-width | Sample-size required |
|------------|-------------------------------------------------|-------------------------|----------------------|
| 0-4 years  | 1.5                                             | 0.75                    | 10,125               |
| 5-14 years | 1.0                                             | 0.5                     | 15,119               |
| >14 years  | 0.5                                             | 0.25                    | 29,801               |

417 \* Assumed age-specific incidence rates (based on data from Dhaka, Bangladesh,  
 418 Delhi, India, and Dong Thap, Vietnam).

419  
 420 The census will take place within a demarcated geographic area that is a known  
 421 catchment population for the surveillance sites (**Figure 1**). In total, at least 100,000  
 422 individuals will be enumerated from  $\geq 20,000$  households. The head/key informant  
 423 within the household will provide written informed consent to take part in the study.  
 424 Information on all residents within the household at the time of the census will be  
 425 gathered from the head of the household/key informant.

426  
 427 A household is defined as individuals living in the same dwelling or compound and  
 428 sharing food from the same kitchen. A household member is considered to have  
 429 migrated out if s/he has left the household and does not intend to come back within  
 430 six months of the time s/he left. A person is considered to have migrated in if s/he  
 431 was not previously included in the list of household members and intends to live in  
 432 the household for the next six months. At enrolment, the head of each household will

1  
2  
3 433 be made aware of the passive surveillance component of the study and encouraged  
4  
5 434 to use the field-site facilities capturing acute febrile illnesses, including acute enteric  
6  
7 435 fever cases. The characterised census population will form the sampling frame for  
8  
9 436 the further components (passive surveillance, healthcare utilisation/WASH surveys  
10  
11 437 and serosurvey) described below.  
12

13  
14

### 15 439 **PASSIVE SURVEILLANCE**

16  
17 440 The passive surveillance component of STRATAA is designed to capture cases of  
18  
19 441 febrile disease occurring in each of the three census populations. Patients presenting  
20  
21 442 to any of the clinical surveillance sites with a history of subjective fever >72 hours or  
22  
23 443 objective fever >38.5 °C on presentation will be approached for enrolment.  
24

25  
26

27 445 An index case will be defined as an individual with a blood culture result confirming  
28  
29 446 infection with *S. Typhi* or *S. Paratyphi A* (or NTS in Malawi), and whose household is  
30  
31 447 included in the census survey. These cases will be used to calculate the disease  
32  
33 448 incidence in each of the three census sites. Consenting individuals will have samples  
34  
35 449 of blood, urine and stool collected to determine a diagnosis of *S. Typhi*, *S. Paratyphi*  
36  
37 450 *A* or NTS and to provide material for the further diagnostic and genetic aims of the  
38  
39 451 study (**Supplemental Table 1**). Patients not resident in the census area will be  
40  
41 452 enrolled as additional cases for the laboratory and genetic components of the  
42  
43 453 programme if written consent is provided.  
44

45  
46

### 47 455 **HEALTHCARE UTILISATION AND WATER, SANITATION AND HYGIENE**

#### 48 456 **SURVEYS**

49  
50  
51 457 To characterise the healthcare-seeking behaviour of individuals living in the census  
52  
53 458 areas, at least 735 households will be randomly selected from the census area at  
54  
55 459 each site to participate in a healthcare utilisation survey. Data will be collected from  
56  
57 460 the head of the household/key informant to describe the actual and hypothetical  
58  
59  
60

1  
2  
3 461 usage of healthcare facilities for febrile episodes. The aim of this component is to  
4  
5 462 estimate the percent of cases (fulfilling the fever case definition) in each age stratum  
6  
7 463 (0-4 years, 5-14 years and >14 years of age) who would or would not seek attention  
8  
9 464 at one of the designated passive surveillance health facilities. Additional data  
10  
11 465 regarding sanitation and hygiene facilities and usage will also be collected. Annual  
12  
13 466 data collection periods will coincide with the peak typhoid season at each of the three  
14  
15 467 sites.  
16  
17 468

### 19 469 **SEROSURVEYS**

20  
21 470 To estimate the seroincidence and seroprevalence of clinical (both formally  
22  
23 471 diagnosed and undiagnosed cases) and subclinical infection or exposure to *S. Typhi*  
24  
25 472 and *S. Paratyphi*, systematic serosurveillance will be performed at each site. Blood  
26  
27 473 samples will be collected at baseline and 3 months later, with sample collection  
28  
29 474 initiated in an on-going basis over the course of one year (**Table 3**). To identify  
30  
31 475 participants for the serosurvey, an age-stratified approach will be used to randomly  
32  
33 476 select individuals from the census population from each age group. Suitable  
34  
35 477 participants will be enrolled by field workers; where the individual identified is not  
36  
37 478 available, a household member in the same age group will be selected. Where this is  
38  
39 479 not possible further households will be randomised into this component to ensure  
40  
41 480 adequate numbers of individuals in the different age groups.  
42  
43  
44 481

45  
46 482 Seroincidence (indicative of recent infection) will be calculated by measuring the rate  
47  
48 483 of seroconversion to anti-H(d) (anti-flagellin) IgG and other acute phase antibodies  
49  
50 484 between both time points, with the denominator consisting only of individuals  
51  
52 485 sampled twice and seronegative at the first time point.<sup>56</sup>  
53  
54 486

55  
56 487 **Table 3. Sample size calculations for the serological surveys to estimate age-**  
57  
58 488 **specific rates of high titres of serum IgG anti-H(d) antibodies.** Assumes age-

489 stratified individual sampling; also accounts for detection of 1% chronic carriage rate  
 490 in  $\geq 10$  year olds.

|              | Anticipate<br>d sero-<br>incidence<br>(%) | Number<br>of initial<br>samples | Anticipat<br>ed<br>number<br>of<br>events | No. of<br>follow-<br>up<br>samples<br>* | No. of<br>events<br>detected | Binomial<br>[95% | Exact<br>CI] | Probabili<br>ty of<br>observin<br>g 0<br>events |
|--------------|-------------------------------------------|---------------------------------|-------------------------------------------|-----------------------------------------|------------------------------|------------------|--------------|-------------------------------------------------|
| 0-4 yrs      | 0.2                                       | 2500                            | 5                                         | 2000                                    | 4                            | 0.0005           | 0.0051       | 0.0182                                          |
| 5-9 yrs      | 0.4                                       | 1300                            | 5.2                                       | 1040                                    | 4                            | 0.0010           | 0.0098       | 0.0155                                          |
| 10-14<br>yrs | 0.8                                       | 800                             | 6.4                                       | 640                                     | 5                            | 0.0025           | 0.0181       | 0.0059                                          |
| >14 yrs      | 0.2                                       | 3900                            | 7.8                                       | 3120                                    | 6                            | 0.0007           | 0.0042       | 0.0019                                          |
| <b>TOTAL</b> |                                           | <b>8500</b>                     | <b>24.2</b>                               | <b>6800</b>                             | <b>19</b>                    |                  |              |                                                 |

491 \*Assuming 5% migration and 15% refusal

492

493 The seroprevalence of anti-Vi IgG will also be measured at baseline to identify  
 494 individuals who could be potential chronic carriers. Previous studies have used high  
 495 anti-Vi IgG antibody levels in serum as a marker of chronic carriage, and our aim is  
 496 to use a recently validated/approved anti-Vi ELISA method to determine possible  
 497 rates of chronic carriage across the three populations.<sup>32,57,58</sup> In order to validate this  
 498 method and to identify possible chronic carriers in the population (in addition to  
 499 identifying whether there may be specific host genetic risk factors for chronic  
 500 carriage), those individuals with a 'high' serum anti-Vi IgG titre will be re-approached  
 501 and asked to provide two stool samples within 48 hours. With the agreement of  
 502 relevant local ethics committees, identified chronic carriers (confirmed high anti-Vi  
 503 IgG serum sample with a positive stool culture) will be treated with antibiotics for  
 504 chronic carriage and clearance of bacterial shedding will be confirmed.

1  
2  
3 5054  
5 506 **HOUSEHOLD CONTACTS**

6  
7 507 To further investigate possible transmission links, household contacts of index cases  
8  
9 508 presenting with blood-culture confirmed *S. Typhi* or *S. Paratyphi A* infection will be  
10  
11 509 identified through the census data collection and approached to take part in this  
12  
13 510 component of the study. Up to five members of the household, with consent, will be  
14  
15 511 asked to provide a blood and stool sample at the time of discharge of the index case,  
16  
17 512 a further stool sample at one month and repeat serology at six months  
18  
19 513 (**Supplemental Table 1**), and asked about the occurrence of symptoms. These  
20  
21 514 samples will be investigated to identify those with subclinical infection or possible  
22  
23 515 chronic carriers. Secondary attack rates for the occurrence of symptomatic infection  
24  
25 516 will be estimated. If serology suggests chronic carriage in a household contact,  
26  
27 517 additional blood and stool samples will be collected to confirm this, and antimicrobial  
28  
29 518 treatment to eradicate carriage will be proposed.

30  
31 519

32  
33 520 Those individuals who are identified as shedding bacteria but without high serum  
34  
35 521 anti-Vi IgG levels will be followed up at a one-year interval to repeat stool culture.  
36  
37 522 Repeat blood samples will be collected from household contacts approximately 3  
38  
39 523 months after initial sampling to explore whether rates of seroconversion are higher in  
40  
41 524 these individuals compared with those in the general population. At least 73  
42  
43 525 households of index cases are expected to be enrolled in this component of the  
44  
45 526 study.

46  
47  
48 527

49 528 In a similar approach to the acute cases of typhoid infection, where chronic carriers  
50  
51 529 are identified from the serosurveys, household transmission studies will be  
52  
53 530 performed among household contacts of possible chronic carriers (i.e. those with a  
54  
55 531 'high' serum anti-Vi IgG titre). A one-time attempt will be made to enroll up to five  
56  
57 532 members of the household, sampling serology and stool looking for evidence of  
58  
59  
60

1  
2  
3 533 typhoid infection. This will provide data on secondary attack rates for both acute and  
4  
5 534 chronic typhoid states.

6  
7 535

## 8 9 536 **DATA MANAGEMENT AND ANALYSIS**

10  
11 537 Census and serosurvey data collection forms will be developed through a structured  
12  
13 538 iterative process and then implemented using Open Data Kit<sup>59</sup>, a system enabling  
14  
15 539 electronic mobile data collection, with customizations by Nafundi, USA, on Android-  
16  
17 540 based tablets. Each household within the census will be assigned a unique study ID  
18  
19 541 and geo-located using GPS where possible; individuals will be given a member  
20  
21 542 number within the household. This information will be collected by local enumerators  
22  
23 543 over a one- to four-month period via these forms and adapted to the three  
24  
25 544 geographic settings. Data will be uploaded onto MySQL databases, where SQL  
26  
27 545 routines will be run nightly to enforce data cleaning on critical variables beyond  
28  
29 546 ODK's validation routines. Daily anonymized data will be backed up from the three  
30  
31 547 sites centrally. For the passive surveillance and household contacts studies a  
32  
33 548 combination of tablet and paper based case report forms will be used to capture the  
34  
35 549 data. Data from paper forms will be transcribed onto electronic databases using  
36  
37 550 Open Clinica<sup>60</sup>. Database reports and descriptive analyses will be generated weekly.  
38  
39 551 To assess efficiency and quality of data capture, the volume, accuracy and time of  
40  
41 552 data collection can be quantified.

42  
43 553 The distribution and burden of enteric illness is likely to vary between countries and  
44  
45 554 thus analyses will be conducted separately for each country. Where data are  
46  
47 555 combined across countries, an adjustment for country differences will be included in  
48  
49 556 statistical models.

50  
51 557

## 52 53 558 **ETHICS**

54  
55 559 Written informed consent will be obtained from the head of each household (as the  
56  
57 560 "key informant") on behalf of the entire household in the demographic census and  
58  
59  
60

1  
2  
3 561 healthcare utilisation surveys. In each of the other components, individual written  
4  
5 562 informed consent will be obtained from individuals over the age of 18 or by a  
6  
7 563 parent/guardian from individuals below this age with additional assent sought from  
8  
9 564 those between 11-17 years old.

10  
11 565 This protocol has received ethics approval from the Oxford Tropical Research Ethics  
12  
13 566 Committee, the Malawian National Health Sciences Research Committee and  
14  
15 567 University of Malawi Research Ethics Committee, the Nepal Health Research  
16  
17 568 Council and the icddr, b Institutional Review Board.

19 569

## 21 570 **DISSEMINATION**

22  
23 571 We hope to make the results from these studies widely available and plan to  
24  
25 572 disseminate our analyses in international peer-reviewed journals. Investigators will  
26  
27 573 be involved in reviewing drafts of the manuscripts, abstracts, press releases and any  
28  
29 574 other publications arising from the study. Furthermore, data from these studies will  
30  
31 575 also be used in the submission of post-doctoral theses.

33 576

## 35 577 **COMMUNITY PUBLIC ENGAGEMENT**

36  
37 578 A collection of specific activities engaging the local population with both the subject  
38  
39 579 of typhoid fever and the activities of the study have been carried out. In Malawi for  
40  
41 580 example, community leaders have been informed and consulted on certain aspects  
42  
43 581 of the study, shown the proposed activities of study teams and given tours of  
44  
45 582 research facilities. There has been engagement with various forms of media  
46  
47 583 disseminating information on the importance of typhoid and study aims. In Nepal,  
48  
49 584 field staff have been given detailed information to communicate to the local  
50  
51 585 populations.

52  
53 586 Further activities are planned to ensure the local populations are informed and  
54  
55 587 engaged.

57  
58 588

1  
2  
3 589 **DISCUSSION**  
4

5 590 The STRATAA study is a comprehensive multicentre study aiming to improve  
6  
7 591 understanding of typhoidal *Salmonella* infection in high-risk endemic populations.  
8  
9 592 This study has been designed to answer key questions and data gaps identified  
10  
11 593 through an innovative application of recent mathematical modelling. These include  
12  
13 594 measuring the burden of age-stratified disease, identifying the relative contribution of  
14  
15 595 asymptomatic/subclinical *Salmonella* infection/exposure, and estimating the  
16  
17 596 contribution to ongoing transmission from the chronic carrier state. These data will  
18  
19 597 inform further modelling required to develop and optimise disease control and  
20  
21 598 prevention strategies that will eventually lead to disease elimination.  
22  
23  
24  
25  
26  
27  
28  
29  
30  
31  
32  
33  
34  
35  
36  
37  
38  
39  
40  
41  
42  
43  
44  
45  
46  
47  
48  
49  
50  
51  
52  
53  
54  
55  
56  
57  
58  
59  
60



1  
2  
3 599 **COMPETING INTERESTS**

4  
5 600 AJP chairs the UK Department of Health's (DH) Joint Committee on Vaccination and  
6  
7 601 Immunisation (JCVI) and the European Medicines Agency (EMA) Scientific Advisory  
8  
9 602 Group on Vaccines and is a member of WHO's SAGE. The views expressed in this  
10  
11 603 manuscript do not necessarily reflect those of JCVI, DH, EMA or WHO. AJP has  
12  
13 604 previously conducted clinical trials on behalf of the University of Oxford funded by  
14  
15 605 vaccine manufacturers but has no personal financial interests.  
16

17 606

18  
19 607 **FUNDING**

20  
21 608 Funding for the STRATAA study has been provided by a Wellcome Trust Strategic  
22  
23 609 Award (No. 106158/Z/14/Z) and the Bill and Melinda Gates Foundation (No.  
24  
25 610 OPP1141321).

26  
27 611 The Malawi-Liverpool-Wellcome Programme and the Oxford University Clinical  
28  
29 612 Research Unit in Vietnam are supported by the Wellcome Trust with Major Overseas  
30  
31 613 Programme core awards. Neither funding body had any role in designing the study,  
32  
33 614 writing this manuscript or the decision to submit.  
34

35 615

36  
37 616 **Authors contributions**

38  
39 617 SB, BB, JDC, GD, CD, MAG, RSH, VEP, FQ, KZ, SD, KH and AJP contributed to the  
40  
41 618 conception and design of the study. ST drafted the protocol of the study. This  
42  
43 619 manuscript was drafted by TD and JM. SB, BB, JDC, GD, SD, CD, MAG, KH, RSH,  
44  
45 620 VEP, FQ, ST, KZ, MAK, FK, MS, DT and AJP read and critically revised the protocol  
46  
47 621 and this manuscript prior to submission.

48 622

49 623

50 624

51  
52  
53  
54  
55 625 1. Crump, J. A. & Mintz, E. D. Global trends in typhoid and paratyphoid Fever.

56  
57 626 *Clin. Infect. Dis.* **50**, 241–6 (2010).  
58  
59  
60

- 1  
2  
3 627 2. Buckle, G. C., Walker, C. L. F. & Black, R. E. Typhoid fever and paratyphoid  
4  
5 628 fever: Systematic review to estimate global morbidity and mortality for 2010. *J.*  
6  
7 629 *Glob. Health* **2**, 10401 (2012).
- 8  
9 630 3. Mogasale, V. *et al.* Burden of typhoid fever in low-income and middle-income  
10  
11 631 countries: a systematic, literature-based update with risk-factor adjustment.  
12  
13 632 *Lancet. Glob. Heal.* **2**, e570-80 (2014).
- 14  
15 633 4. Arndt, M. B. *et al.* Estimating the Burden of Paratyphoid A in Asia and Africa.  
16  
17 634 *PLoS Negl. Trop. Dis.* **8**, e2925 (2014).
- 18  
19 635 5. Darton, T. C., Blohmke, C. J. & Pollard, A. J. Typhoid epidemiology,  
20  
21 636 diagnostics and the human challenge model. *Curr. Opin. Gastroenterol.* **30**, 7–  
22  
23 637 17 (2014).
- 24  
25 638 6. Wong, V. K. *et al.* Phylogeographical analysis of the dominant multidrug-  
26  
27 639 resistant H58 clade of *Salmonella Typhi* identifies inter- and intracontinental  
28  
29 640 transmission events. *Nat. Genet.* **47**, 632–639 (2015).
- 30  
31 641 7. WHO | WHO/IVB/12.02. WHO (2013).
- 32  
33 642 8. Szu, S. C. Development of Vi conjugate – a new generation of typhoid  
34  
35 643 vaccine. *Expert Rev. Vaccines* **12**, 1273–1286 (2013).
- 36  
37 644 9. Szu, S. C., Stone, A. L., Robbins, J. D., Schneerson, R. & Robbins, J. B. Vi  
38  
39 645 capsular polysaccharide-protein conjugates for prevention of typhoid fever.  
40  
41 646 Preparation, characterization, and immunogenicity in laboratory animals. *J.*  
42  
43 647 *Exp. Med.* **166**, 1510–24 (1987).
- 44  
45 648 10. Lin, F. Y. C. *et al.* The Efficacy of a *Salmonella typhi* Vi Conjugate Vaccine in  
46  
47 649 Two-to-Five-Year-Old Children. *N. Engl. J. Med.* **344**, 1263–1269 (2001).
- 48  
49 650 11. Saul, A., Smith, T. & Maire, N. Stochastic Simulation of Endemic *Salmonella*  
50  
51 651 *enterica* Serovar Typhi: The Importance of Long Lasting Immunity and the  
52  
53 652 Carrier State. *PLoS One* **8**, e74097 (2013).
- 54  
55 653 12. Pitzer, V. E. *et al.* Predicting the Impact of Vaccination on the Transmission  
56  
57 654 Dynamics of Typhoid in South Asia: A Mathematical Modeling Study. *PLoS*

- 1  
2  
3 655 *Negl. Trop. Dis.* **8**, e2642 (2014).  
4  
5 656 13. Watson, C. H. & Edmunds, W. J. A review of typhoid fever transmission  
6  
7 657 dynamic models and economic evaluations of vaccination. *Vaccine* **33 Suppl**  
8  
9 658 **3**, C42-54 (2015).  
10  
11 659 14. Crump, J. A., Ram, P. K., Gupta, S. K., Miller, M. A. & Mintz, E. D. Part I.  
12  
13 660 Analysis of data gaps pertaining to *Salmonella enterica* serotype Typhi  
14  
15 661 infections in low and medium human development index countries, 1984-2005.  
16  
17 662 *Epidemiol. Infect.* **136**, 436–48 (2008).  
18  
19 663 15. Havelaar, A. H. *et al.* World Health Organization Global Estimates and  
20  
21 664 Regional Comparisons of the Burden of Foodborne Disease in 2010. *PLOS*  
22  
23 665 *Med.* **12**, e1001923 (2015).  
24  
25 666 16. Murray, C. J. L. *et al.* Disability-adjusted life years (DALYs) for 291 diseases  
26  
27 667 and injuries in 21 regions, 1990-2010: a systematic analysis for the Global  
28  
29 668 Burden of Disease Study 2010. *Lancet (London, England)* **380**, 2197–223  
30  
31 669 (2012).  
32  
33 670 17. Kyu, H. H. *et al.* Global and National Burden of Diseases and Injuries Among  
34  
35 671 Children and Adolescents Between 1990 and 2013. *JAMA Pediatr.* **170**, 267  
36  
37 672 (2016).  
38  
39 673 18. Mogasale, V., Ramani, E., Mogasale, V. V & Park, J. What proportion of  
40  
41 674 *Salmonella* Typhi cases are detected by blood culture? A systematic literature  
42  
43 675 review. *Ann. Clin. Microbiol. Antimicrob.* **15**, 32 (2016).  
44  
45 676 19. Mogasale, V. *et al.* Revisiting typhoid fever surveillance in low and middle  
46  
47 677 income countries: lessons from systematic literature review of population-  
48  
49 678 based longitudinal studies. *BMC Infect. Dis.* **16**, 35 (2016).  
50  
51 679 20. Olopoenia, L. A. & King, A. L. Widal agglutination test - 100 years later: still  
52  
53 680 plagued by controversy. *Postgrad. Med. J.* **76**, 80–4 (2000).  
54  
55 681 21. Baker, S. *et al.* Searching for the elusive typhoid diagnostic. *BMC Infect. Dis.*  
56  
57 682 **10**, 45 (2010).  
58  
59  
60

- 1  
2  
3 683 22. Waddington, C. S. *et al.* An Outpatient, Ambulant-Design, Controlled Human  
4  
5 684 Infection Model Using Escalating Doses of Salmonella Typhi Challenge  
6  
7 685 Delivered in Sodium Bicarbonate Solution. *Clin. Infect. Dis.* **58**, 1230–1240  
8  
9 686 (2014).  
10  
11 687 23. Keddy, K. H. *et al.* Sensitivity and specificity of typhoid fever rapid antibody  
12  
13 688 tests for laboratory diagnosis at two sub-Saharan African sites. *Bull. World*  
14  
15 689 *Health Organ.* **89**, 640–7 (2011).  
16  
17 690 24. Parry, C. M., Wijedoru, L., Arjyal, A. & Baker, S. The utility of diagnostic tests  
18  
19 691 for enteric fever in endemic locations. *Expert Rev. Anti. Infect. Ther.* **9**, 711–  
20  
21 692 725 (2011).  
22  
23 693 25. Näsström, E. *et al.* *Salmonella* Typhi and *Salmonella* Paratyphi A elaborate  
24  
25 694 distinct systemic metabolite signatures during enteric fever. *Elife* **3**, e56971  
26  
27 695 (2014).  
28  
29 696 26. Thompson, L. J. *et al.* Transcriptional response in the peripheral blood of  
30  
31 697 patients infected with *Salmonella enterica* serovar Typhi. *Proc. Natl. Acad. Sci.*  
32  
33 698 **106**, 22433–22438 (2009).  
34  
35 699 27. Blohmke, C. J. *et al.* Interferon-driven alterations of the host's amino acid  
36  
37 700 metabolism in the pathogenesis of typhoid fever. *J. Exp. Med.* **213**, 1061–1077  
38  
39 701 (2016).  
40  
41 702 28. Levine, M. M., Black, R. E. & Lanata, C. Precise estimation of the numbers of  
42  
43 703 chronic carriers of *Salmonella typhi* in Santiago, Chile, an endemic area. *J.*  
44  
45 704 *Infect. Dis.* **146**, 724–6 (1982).  
46  
47 705 29. Pulickal, A. S. *et al.* Kinetics of the Natural, Humoral Immune Response to  
48  
49 706 *Salmonella enterica* Serovar Typhi in Kathmandu, Nepal. *Clin. Vaccine*  
50  
51 707 *Immunol.* **16**, 1413–1419 (2009).  
52  
53 708 30. Levine, M. M. *et al.* Diagnostic value of the Widal test in areas endemic for  
54  
55 709 typhoid fever. *Am. J. Trop. Med. Hyg.* **27**, 795–800 (1978).  
56  
57 710 31. Lanata, C. F. *et al.* Vi serology in detection of chronic *Salmonella typhi* carriers  
58  
59  
60

- 1  
2  
3 711 in an endemic area. *Lancet (London, England)* **2**, 441–3 (1983).  
4  
5 712 32. Nolan, C. M. *et al.* Evaluation of a new assay for Vi antibody in chronic carriers  
6  
7 713 of *Salmonella typhi*. *J. Clin. Microbiol.* **12**, 22–6 (1980).  
8  
9 714 33. Gupta, A. *et al.* Evaluation of community-based serologic screening for  
10  
11 715 identification of chronic *Salmonella Typhi* carriers in Vietnam. *Int. J. Infect. Dis.*  
12  
13 716 **10**, 309–314 (2006).  
14  
15 717 34. Liang, L. *et al.* Immune profiling with a *Salmonella Typhi* antigen microarray  
16  
17 718 identifies new diagnostic biomarkers of human typhoid. *Sci. Rep.* **3**, 1043  
18  
19 719 (2013).  
20  
21 720 35. Dunstan, S. J. *et al.* Variation at HLA-DRB1 is associated with resistance to  
22  
23 721 enteric fever. *Nat. Genet.* **46**, 1333–1336 (2014).  
24  
25 722 36. Dunstan, S. J. *et al.* A TNF region haplotype offers protection from typhoid  
26  
27 723 fever in Vietnamese patients. *Hum. Genet.* **122**, 51–61 (2007).  
28  
29 724 37. Holt, K. E. *et al.* High-throughput sequencing provides insights into genome  
30  
31 725 variation and evolution in *Salmonella Typhi*. *Nat. Genet.* **40**, 987–993 (2008).  
32  
33 726 38. Baker, S. *et al.* Combined high-resolution genotyping and geospatial analysis  
34  
35 727 reveals modes of endemic urban typhoid fever transmission. *Open Biol.* **1**,  
36  
37 728 (2011).  
38  
39 729 39. Dongol, S. *et al.* The Microbiological and Clinical Characteristics of Invasive  
40  
41 730 *Salmonella* in Gallbladders from Cholecystectomy Patients in Kathmandu,  
42  
43 731 Nepal. *PLoS One* **7**, e47342 (2012).  
44  
45 732 40. WHO. WHO | Typhoid vaccines position paper. *WHO* (2008).  
46  
47 733 41. Thiem, V. D. *et al.* The Vi Conjugate Typhoid Vaccine Is Safe, Elicits  
48  
49 734 Protective Levels of IgG Anti-Vi, and Is Compatible with Routine Infant  
50  
51 735 Vaccines. *Clin. Vaccine Immunol.* **18**, 730–735 (2011).  
52  
53 736 42. Mohan, V. K. *et al.* Safety and Immunogenicity of a Vi Polysaccharide–  
54  
55 737 Tetanus Toxoid Conjugate Vaccine (Typbar-TCV) in Healthy Infants, Children,  
56  
57 738 and Adults in Typhoid Endemic Areas: A Multicenter, 2-Cohort, Open-Label,  
58  
59  
60

- 1  
2  
3 739 Double-Blind, Randomized Controlled Phase 3 Study. *Clin. Infect. Dis.* **61**,  
4 393–402 (2015).  
5  
6  
7 741 43. Mitra, M. *et al.* Efficacy and safety of vi-tetanus toxoid conjugated typhoid  
8 vaccine (PedaTyph™) in Indian children: School based cluster randomized  
9 742 study. *Hum. Vaccin. Immunother.* **12**, 939–945 (2016).  
10  
11  
12  
13 744 44. Darton, T. C. *et al.* Using a Human Challenge Model of Infection to Measure  
14 Vaccine Efficacy: A Randomised, Controlled Trial Comparing the Typhoid  
15 745 Vaccines M01ZH09 with Placebo and Ty21a. *PLoS Negl. Trop. Dis.* **10**,  
16 746 e0004926 (2016).  
17  
18  
19  
20  
21 748 45. Azmatullah, A., Qamar, F. N., Thaver, D., Zaidi, A. K. & Bhutta, Z. A.  
22 Systematic review of the global epidemiology, clinical and laboratory profile of  
23 749 enteric fever. *J. Glob. Health* **5**, 20407 (2015).  
24  
25  
26  
27 751 46. Feasey, N. A. *et al.* Three Epidemics of Invasive Multidrug-Resistant  
28 *Salmonella* Bloodstream Infection in Blantyre, Malawi, 1998–2014. *Clin. Infect.*  
29 752 *Dis.* **61**, S363–S371 (2015).  
30  
31  
32  
33 754 47. Feasey, N. A. *et al.* Rapid Emergence of Multidrug Resistant, H58-Lineage  
34 *Salmonella* Typhi in Blantyre, Malawi. *PLoS Negl. Trop. Dis.* **9**, e0003748  
35 755 (2015).  
36  
37  
38  
39 757 48. Saha, S. K. *et al.* Typhoid fever in Bangladesh: implications for vaccination  
40 policy. *Pediatr. Infect. Dis. J.* **20**, 521–4 (2001).  
41  
42  
43  
44 759 49. Brooks, W. A. *et al.* Bacteremic Typhoid Fever in Children in an Urban Slum,  
45 Bangladesh. *Emerg. Infect. Dis.* **11**, 326–329 (2005).  
46  
47  
48 761 50. Khanam, F. *et al.* Typhoid fever in young children in Bangladesh: clinical  
49 findings, antibiotic susceptibility pattern and immune responses. *PLoS Negl.*  
50 762 *Trop. Dis.* **9**, e0003619 (2015).  
51  
52  
53  
54 764 51. Choko, A. T. *et al.* The Uptake and Accuracy of Oral Kits for HIV Self-Testing  
55 in High HIV Prevalence Setting: A Cross-Sectional Feasibility Study in  
56 765 Blantyre, Malawi. *PLoS Med.* **8**, e1001102 (2011).  
57  
58  
59  
60

- 1  
2  
3 767 52. Gordon, M. A. *et al.* Epidemics of Invasive *Salmonella enterica* Serovar  
4 Enteritidis and *S. enterica* Serovar Typhimurium Infection Associated with  
5 768  
6 Multidrug Resistance among Adults and Children in Malawi. *Clin. Infect. Dis.*  
7 769  
8 **46**, 963–969 (2008).  
9 770  
10  
11 771 53. Pitzer, V. E. *et al.* Mathematical Modeling to Assess the Drivers of the Recent  
12 772  
13 Emergence of Typhoid Fever in Blantyre, Malawi. *Clin. Infect. Dis.* **61**, S251–  
14 773  
15 S258 (2015).  
16  
17 774 54. Karkey, A. *et al.* The Burden and Characteristics of Enteric Fever at a  
18 775  
19 Healthcare Facility in a Densely Populated Area of Kathmandu. *PLoS One* **5**,  
20 776  
21 e13988 (2010).  
22  
23 777 55. Pham Thanh, D. *et al.* A novel ciprofloxacin-resistant subclade of H58  
24 778  
25 *Salmonella* Typhi is associated with fluoroquinolone treatment failure. *Elife* **5**,  
26 779  
27 e14003 (2016).  
28  
29 780 56. Calderón, I. *et al.* Antibodies to porin antigens of *Salmonella typhi* induced  
30 781  
31 during typhoid infection in humans. *Infect. Immun.* **52**, 209–12 (1986).  
32  
33 782 57. Nolan, C. M. *et al.* Vi serology in the detection of typhoid carriers. *Lancet*  
34 783  
35 (*London, England*) **1**, 583–5 (1981).  
36  
37 784 58. Ferry, B. L. *et al.* Development of an anti-*Salmonella typhi* Vi ELISA:  
38 785  
39 assessment of immunocompetence in healthy donors. *Clin. Exp. Immunol.*  
40 786  
41 **136**, 297–303 (2004).  
42  
43 787 59. ODK. Open Data Kit. at <<https://opendatakit.org/>>  
44  
45 788 60. OpenClinica - Electronic data capture for clinical research. at  
46  
47 <<https://www.openclinica.com/>>  
48  
49  
50 790

1  
2  
3  
4  
5  
6  
7  
8  
9  
10  
11  
12  
13  
14  
15  
16  
17  
18  
19  
20  
21  
22  
23  
24  
25  
26  
27  
28  
29  
30  
31  
32  
33  
34  
35  
36  
37  
38  
39  
40  
41  
42  
43  
44  
45  
46  
47  
48  
49

791

For peer review only



Supplemental Table 1. Overview of STRATAA Study Procedures.

| Study component                            | CENSUS            |                |                |                |                |                |    | HEALTHCARE UTILISATION     |     | PASSIVE SURVEILLANCE      |       |   |    |                                   |   |   |                   | SEROSURVEY   |                |                                         |   |   |   |
|--------------------------------------------|-------------------|----------------|----------------|----------------|----------------|----------------|----|----------------------------|-----|---------------------------|-------|---|----|-----------------------------------|---|---|-------------------|--------------|----------------|-----------------------------------------|---|---|---|
|                                            |                   |                |                |                |                |                |    | Peak seasons during census |     | All cases                 |       |   |    | Household contacts of index cases |   |   |                   | Participants |                | Household contacts of possible carriers |   |   |   |
|                                            |                   |                |                |                |                |                |    |                            |     | Cases within census area* |       |   |    |                                   |   |   |                   |              |                |                                         |   |   |   |
| Sample size (individuals unless specified) | ≥100 000 per site |                |                |                |                |                |    | >700 households            |     | Convenience               |       |   |    | ≥73 households                    |   |   |                   | 8500         | 6800           | Members of ≥50 households               |   |   |   |
| Time (months, unless specified)            | 0                 | 4              | 8              | 12             | 16             | 20             | 24 | 1st                        | 2nd | 0                         | Day 8 | 1 | ~6 | 12                                | 0 | 1 | ~3                | ~12          | 0              | **                                      | 3 | 6 |   |
| Consent                                    | X                 |                |                |                |                |                |    | X                          |     | X                         |       |   |    |                                   | X |   | X <sup>\$\$</sup> |              | X              |                                         |   |   | x |
| Demographic Information                    | X                 | X <sup>#</sup> | X <sup>#</sup> | X <sup>#</sup> | X <sup>#</sup> | X <sup>#</sup> | X  |                            |     |                           |       |   |    |                                   |   |   |                   |              |                |                                         |   |   |   |
| Clinical information                       |                   |                |                |                |                |                |    |                            |     | X                         | X     | X | X  | X                                 | X |   |                   |              |                |                                         |   |   |   |
| Questionnaire                              |                   |                |                |                |                |                |    | X                          | X   |                           |       |   |    |                                   |   |   |                   |              |                |                                         |   |   |   |
| Blood sample                               |                   |                |                |                |                |                |    |                            |     | X <sup>@</sup>            |       |   | X  |                                   | X |   | X <sup>\$</sup>   |              | X <sup>@</sup> |                                         |   | X | X |
| Stool sample                               |                   |                |                |                |                |                |    |                            |     | X                         |       | X | X  | (X)                               | X | X | 2X <sup>€</sup>   | (3X)         |                | 2X <sup>€</sup>                         |   |   | X |
| Urine sample                               |                   |                |                |                |                |                |    |                            |     | X <sup>@</sup>            |       |   |    |                                   |   |   |                   |              | X <sup>@</sup> |                                         |   |   |   |

**Supplemental Table 1. Overview of STRATAA Study Procedures.**

\* Case within census area = index if blood-culture confirmed typhoid diagnosis, resident in census area and household members consent to participation.

# Births, deaths and migrations updated every 4 months in Nepal & Bangladesh

~ approximately - dependent on timeframe of availability for the Vi ELISA result

\$ Host genetics collected/used for laboratory studies if either stool or serum positive or both

§ separate consent for host genetics

@ additional blood (RNA + plasma) and urine samples (subset of 100 with typhoid (culture positive), 100 with clinically suspected typhoid (culture negative), 100 with alternate bacteraemia; and 100 healthy controls (from the serosurvey) from adults 16-40yrs who give consent for genetic assays to be performed.

€ Participants identified as having high anti-Vi IgG only - 2 stool samples collected 48 hours apart once ELISA result known to identify/confirm carriage

\*\* When result known

Total blood volumes: **Passive survey** ≤16 mL adults (>16 years), ≤7 mL children (<16 years); **Serosurvey** ≤8 mL adults (>16 years), ≤7 mL children. Cell pellets stored for host genetics.

# BMJ Open

## THE STRATAA STUDY PROTOCOL: A PROGRAMME TO ASSESS THE BURDEN OF ENTERIC FEVER IN BANGLADESH, MALAWI AND NEPAL USING PROSPECTIVE POPULATION CENSUS, PASSIVE SURVEILLANCE, SEROLOGICAL STUDIES AND HEALTHCARE UTILISATION SURVEYS

|                               |                                                                                                                                                                                                                                                                                                                                                                                                                                                                                                                                                                                                                                                                                                                                                                                                                                                                                                                                                                                                                                                                                                                                                                                                                                                                                                                                                                                                                                                                                                                                                                                                                                                                                                                                                                                                                                                                                                                                                                                                                                                                                                                                                                                                                                                                                                                                                       |
|-------------------------------|-------------------------------------------------------------------------------------------------------------------------------------------------------------------------------------------------------------------------------------------------------------------------------------------------------------------------------------------------------------------------------------------------------------------------------------------------------------------------------------------------------------------------------------------------------------------------------------------------------------------------------------------------------------------------------------------------------------------------------------------------------------------------------------------------------------------------------------------------------------------------------------------------------------------------------------------------------------------------------------------------------------------------------------------------------------------------------------------------------------------------------------------------------------------------------------------------------------------------------------------------------------------------------------------------------------------------------------------------------------------------------------------------------------------------------------------------------------------------------------------------------------------------------------------------------------------------------------------------------------------------------------------------------------------------------------------------------------------------------------------------------------------------------------------------------------------------------------------------------------------------------------------------------------------------------------------------------------------------------------------------------------------------------------------------------------------------------------------------------------------------------------------------------------------------------------------------------------------------------------------------------------------------------------------------------------------------------------------------------|
| Journal:                      | <i>BMJ Open</i>                                                                                                                                                                                                                                                                                                                                                                                                                                                                                                                                                                                                                                                                                                                                                                                                                                                                                                                                                                                                                                                                                                                                                                                                                                                                                                                                                                                                                                                                                                                                                                                                                                                                                                                                                                                                                                                                                                                                                                                                                                                                                                                                                                                                                                                                                                                                       |
| Manuscript ID                 | bmjopen-2017-016283.R2                                                                                                                                                                                                                                                                                                                                                                                                                                                                                                                                                                                                                                                                                                                                                                                                                                                                                                                                                                                                                                                                                                                                                                                                                                                                                                                                                                                                                                                                                                                                                                                                                                                                                                                                                                                                                                                                                                                                                                                                                                                                                                                                                                                                                                                                                                                                |
| Article Type:                 | Protocol                                                                                                                                                                                                                                                                                                                                                                                                                                                                                                                                                                                                                                                                                                                                                                                                                                                                                                                                                                                                                                                                                                                                                                                                                                                                                                                                                                                                                                                                                                                                                                                                                                                                                                                                                                                                                                                                                                                                                                                                                                                                                                                                                                                                                                                                                                                                              |
| Date Submitted by the Author: | 25-May-2017                                                                                                                                                                                                                                                                                                                                                                                                                                                                                                                                                                                                                                                                                                                                                                                                                                                                                                                                                                                                                                                                                                                                                                                                                                                                                                                                                                                                                                                                                                                                                                                                                                                                                                                                                                                                                                                                                                                                                                                                                                                                                                                                                                                                                                                                                                                                           |
| Complete List of Authors:     | <p>Darton, Thomas; Oxford University Clinical Research Unit; University of Sheffield Department of Infection and Immunity</p> <p>Meiring, James; University of Oxford, Oxford Vaccine Group, Paediatrics</p> <p>Tonks, Susan; Oxford Vaccine Group, Department of Paediatrics</p> <p>Khan, Md Arifuzzaman; International Centre for Diarrhoeal Disease Research</p> <p>Khanam, Farhana; International Centre for Diarrhoeal Disease Research</p> <p>Shakya, Mila; Patan Academy of Health Sciences, Oxford University Clinical Research Unit</p> <p>Thindwa, Deus; University of Malawi College of Medicine, Malawi Liverpool Wellcome Trust Clinical Research Programme</p> <p>Baker, Stephen; Oxford University Clinical Research Unit, The Hospital for Tropical Diseases, Wellcome Trust Major Overseas Programme; Nuffield Department of Clinical Medicine, Centre for Tropical Medicine and Global Health</p> <p>Basnyat, Buddha; Patan Academy of Health Sciences, Oxford University Clinical Research Unit; Nuffield Department of Clinical Medicine, Centre for Tropical Medicine and Global Health</p> <p>Clemens, John; International Centre for Diarrhoeal Disease Research; University of California Los Angeles Jonathan and Karin Fielding School of Public Health</p> <p>Dougan, Gordon; Wellcome Trust Sanger Institute</p> <p>Dolecek, Christiane; Mahidol University, Mahidol-Oxford Tropical Medicine Research Unit, Faculty of Tropical Medicine; Nuffield Department of Clinical Medicine, Centre for Tropical Medicine and Global Health</p> <p>Dunstan, Sarah; University of Melbourne, The Peter Doherty Institute for Infection and Immunity</p> <p>Gordon, Melita; University of Malawi College of Medicine, Malawi Liverpool Wellcome Trust Clinical Research Programme; University of Liverpool, Institute of Infection and Global Health</p> <p>Heyderman, Robert; University College London, Division of Infection and Immunity; University of Malawi College of Medicine, Malawi Liverpool Wellcome Trust Clinical Research Programme</p> <p>Holt, Kathryn; University of Melbourne, Centre for Systems Genomics; University of Melbourne, Department of Biochemistry and Molecular Biology</p> <p>Pitzer, Virginia E.; Yale Univ, Department of Epidemiology of Microbial Diseases, Yale School of Public Health</p> |

|                                    |                                                                                                                                                                                                                                                      |
|------------------------------------|------------------------------------------------------------------------------------------------------------------------------------------------------------------------------------------------------------------------------------------------------|
|                                    | Qadri, Firdausi ; International Centre for Diarrhoeal Disease Research Zaman, K; International Centre for Diarrhoeal Disease Research, Bangladesh (icddr,b), Centre for Equity and Health Systems Pollard, Andrew; University of Oxford, Paediatrics |
| <b>Primary Subject Heading</b> :   | Infectious diseases                                                                                                                                                                                                                                  |
| <b>Secondary Subject Heading</b> : | Epidemiology, Global health, Diagnostics                                                                                                                                                                                                             |
| <b>Keywords</b> :                  | Diagnostic microbiology < INFECTIOUS DISEASES, Epidemiology < INFECTIOUS DISEASES, Paediatric infectious disease & immunisation < PAEDIATRICS, Tropical medicine < INFECTIOUS DISEASES                                                               |
|                                    |                                                                                                                                                                                                                                                      |

SCHOLARONE™  
Manuscripts

1  
2  
3  
4  
5  
6  
7  
8  
9  
10  
11  
12  
13  
14  
15  
16  
17  
18  
19  
20  
21  
22  
23  
24  
25  
26  
27  
28  
29  
30  
31  
32  
33  
34  
35  
36  
37  
38  
39  
40  
41  
42  
43  
44  
45  
46  
47  
48  
49  
50  
51  
52  
53  
54  
55  
56  
57  
58  
59  
60

1           **THE STRATAA STUDY PROTOCOL: A PROGRAMME TO ASSESS THE**  
2           **BURDEN OF ENTERIC FEVER IN BANGLADESH, MALAWI AND NEPAL USING**  
3           **PROSPECTIVE POPULATION CENSUS, PASSIVE SURVEILLANCE,**  
4           **SEROLOGICAL STUDIES AND HEALTHCARE UTILISATION SURVEYS**

6           **Short title: The STRATAA study**

7           **Authors:** Thomas C. Darton,<sup>1,2,3,\*</sup> James E. Meiring,<sup>2,\*†</sup> Susan Tonks,<sup>2</sup> Md  
8           Arifuzzaman Khan,<sup>4</sup> Farhana Khanam,<sup>4</sup> Mila Shakya,<sup>5</sup> Deus Thindwa,<sup>6</sup> Stephen  
9           Baker,<sup>1,7,8</sup> Buddha Basnyat,<sup>5,7</sup> John D. Clemens,<sup>4,9</sup> Gordon Dougan,<sup>8</sup> Christiane  
10          Dolecek,<sup>7, 10</sup> Sarah J. Dunstan,<sup>11</sup> Melita A. Gordon,<sup>6,12</sup> Robert S. Heyderman,<sup>6,13</sup>  
11          Kathryn E. Holt,<sup>14,15</sup> Virginia E. Pitzer,<sup>16</sup> Firdausi Qadri,<sup>4</sup> K. Zaman,<sup>4</sup> and Andrew J.  
12          Pollard,<sup>2</sup> on behalf of the STRATAA Study Consortium

13          **Affiliations:**

- 14           1. The Hospital for Tropical Diseases, Wellcome Trust Major Overseas  
15           Programme, Oxford University Clinical Research Unit, Ho Chi Minh City,  
16           Vietnam;
- 17           2. Oxford Vaccine Group, Department of Paediatrics, University of Oxford, and  
18           the NIHR Oxford Biomedical Research Centre, Oxford, United Kingdom;
- 19           3. Department of Infection, Immunity and Cardiovascular Disease, University of  
20           Sheffield Medical School, United Kingdom;
- 21           4. International Centre for Diarrhoeal Diseases Research, Bangladesh (icddr,b),  
22           Dhaka, Bangladesh;
- 23           5. Oxford University Clinical Research Unit, Patan Academy of Health Sciences,  
24           Kathmandu, Nepal;
- 25           6. Malawi Liverpool Wellcome Trust Clinical Research Programme, University of  
26           Malawi College of Medicine, Blantyre, Malawi;
- 27           7. Centre for Tropical Medicine and Global Health, Nuffield Department of  
28           Medicine, University of Oxford, United Kingdom;

- 1  
2  
3 29 8. The Wellcome Trust Sanger Institute, Hinxton, Cambridgeshire, United  
4  
5 30 Kingdom;  
6  
7 31 9. UCLA Fielding School of Public Health, Los Angeles, United States of  
8  
9 32 America;  
10  
11 33 10. Mahidol-Oxford Tropical Medicine Research Unit, Faculty of Tropical  
12  
13 34 Medicine, Mahidol University, Bangkok, Thailand;  
14  
15 35 11. The Peter Doherty Institute for Infection and Immunity, The University of  
16  
17 36 Melbourne, Melbourne, Australia;  
18  
19 37 12. Institute of Infection and Global Health, University of Liverpool, Liverpool,  
20  
21 38 United Kingdom;  
22  
23 39 13. Division of Infection and Immunity, University College London, London,  
24  
25 40 United Kingdom;  
26  
27 41 14. Centre for Systems Genomics, University of Melbourne, Parkville, Victoria,  
28  
29 42 Australia;  
30  
31 43 15. Department of Biochemistry and Molecular Biology, University of Melbourne,  
32  
33 44 Parkville, Victoria, Australia;  
34  
35 45 16. Department of Epidemiology of Microbial Diseases, Yale School of Public  
36  
37 46 Health, Yale University, New Haven, Connecticut, United States of America  
38  
39 47  
40  
41 48 \* Contributed equally  
42  
43 49 **Corresponding Author:** Dr James Meiring, Oxford Vaccine Group, Department of  
44  
45 50 Paediatrics, University of Oxford, and the NIHR Oxford Biomedical Research Centre,  
46  
47 51 Oxford, United Kingdom.  
48  
49 52 Email: james.meiring@paediatrics.ox.ac.uk  
50  
51 53 **Consortium members:**  
52  
53 54 Abhilasha Karkey, Sabina Dongol, Amit Aryjal (Oxford University Clinical Research  
54  
55 55 Unit, Patan Academy of Health Sciences, Kathmandu, Nepal);  
56  
57  
58  
59  
60

1  
2  
3 56 Nirod Chandra Saha (International Center for Diarrhoeal Diseases Research, Dhaka,  
4  
5 57 Bangladesh)  
6  
7 58 Tikhala Makhaza Jere, Chisomo Msefula, Tonney Nyirenda (University of Liverpool,  
8  
9 59 United Kingdom and the Malawi Liverpool Wellcome Trust Clinical Research  
10  
11 60 Programme, Malawi)  
12  
13 61 Tan Trinh Van (The Hospital for Tropical Diseases, Wellcome Trust Major Overseas  
14  
15 62 Programme, Oxford University Clinical Research Unit, Ho Chi Minh City, Vietnam)  
16  
17 63 Stephen Reece (Wellcome Trust Sanger Institute, Cambridge, United Kingdom)  
18  
19 64 Merryn Voysey, Christoph J. Blohmke, Yama Farooq, Jennifer Hill  
20  
21 65 (Oxford Vaccine Group, Department of Paediatrics, University of Oxford, and the  
22  
23 66 NIHR Oxford Biomedical Research Centre, Oxford, United Kingdom)  
24  
25 67 Neil J. Saad (Yale School of Public Health, Yale University, New Haven, Connecticut,  
26  
27 68 United States of America)  
28  
29 69  
30  
31  
32  
33  
34  
35  
36  
37  
38  
39  
40  
41  
42  
43  
44  
45  
46  
47  
48  
49  
50  
51  
52  
53  
54  
55  
56  
57  
58  
59  
60

1  
2  
3 70 **ABSTRACT**  
4

5 71 **Introduction**  
6

7 72 Invasive infections caused by *Salmonella enterica* serovar Typhi and Paratyphi A are  
8  
9 73 estimated to account for 12-27 million febrile illness episodes worldwide annually.  
10

11 74 Determining the true burden of typhoidal *Salmonellae* infections is hindered by lack  
12  
13 75 of population-based studies and adequate laboratory diagnostics.  
14

15 76 The STRATAA (Strategic Typhoid alliance across Africa and Asia) study takes a  
16  
17 77 systematic approach to measuring the age-stratified burden of clinical and subclinical  
18  
19 78 disease caused by typhoidal *Salmonellae* infections at three high-incidence urban  
20  
21 79 sites in Africa and Asia. We aim to explore the natural history of *Salmonella*  
22  
23 80 transmission in endemic settings, addressing key uncertainties relating to the  
24  
25 81 epidemiology of enteric fever identified through mathematical models, and enabling  
26  
27 82 optimisation of vaccine strategies.  
28

29 83 **Methods/Design**  
30

31 84 Using census-defined denominator populations of  $\geq 100,000$  individuals at sites in  
32  
33 85 Malawi, Bangladesh and Nepal, the primary outcome is to characterize the burden of  
34  
35 86 enteric fever in these populations over a 24-month period. During passive  
36  
37 87 surveillance, clinical and household data, and laboratory samples will be collected  
38  
39 88 from febrile individuals. In parallel, healthcare utilization and water, sanitation and  
40  
41 89 hygiene surveys will be performed to characterise healthcare-seeking behaviour and  
42  
43 90 assess potential routes of transmission. The rates of both undiagnosed and  
44  
45 91 subclinical exposure to typhoidal *Salmonellae* (seroincidence), identification of  
46  
47 92 chronic carriage, and population seroprevalence of typhoid infection will be assessed  
48  
49 93 through, age-stratified serosurveys performed at each site. Secondary attack rates  
50  
51 94 will be estimated among household contacts of acute enteric fever cases and  
52  
53 95 possible chronic carriers.  
54

55  
56 96 **Ethics and Dissemination**  
57  
58  
59  
60



1  
2  
3 97 This protocol has been ethically approved by the Oxford Tropical Research Ethics  
4  
5 98 Committee, the icddr,b Institutional Review Board, the Malawian National Health  
6  
7 99 Sciences Research Committee and College of Medicine Research Ethics Committee  
8  
9 100 and Nepal Health Research Council. The study is being conducted in accordance  
10  
11 101 with the principles of the Declaration of Helsinki and Good Clinical Practice. Informed  
12  
13 102 consent is obtained before study enrolment. Results will be submitted to international  
14  
15 103 peer-reviewed journals and presented at international conferences.  
16  
17 104

## 19 105 **STRENGTHS AND LIMITATIONS**

20  
21 106 - The study is designed with a comprehensive multicomponent epidemiological  
22  
23 107 approach, nesting passive surveillance, serosurveillance and healthcare utilisation  
24  
25 108 surveys within a demographic census population, to accurately determine the age-  
26  
27 109 stratified burden of enteric fever.  
28  
29 110 - The diversity of field sites in Africa and Asia, will provide data on typhoid  
30  
31 111 epidemiology and transmission from a range of differing epidemiological settings.  
32  
33 112 - The combination of a traditional epidemiological approach with novel laboratory  
34  
35 113 methods for the diagnosis of febrile illness and investigation of the host and  
36  
37 114 pathogen genetics and antimicrobial resistance determinants provides a unique  
38  
39 115 platform to study this disease.  
40  
41 116 - Practical limitations include the sharing and standardisation of clinical definitions,  
42  
43 117 data and sample collection methods and laboratory assays, based on the facilities  
44  
45 118 and staff available and community requirements at each site.  
46  
47 119 - The number of field-sites included in this current protocol is limited to three; all of  
48  
49 120 these sites are densely populated urban settings with likely high-incidence of enteric  
50  
51 121 fever transmission. The degree to which our data may be extrapolated to other  
52  
53 122 settings and countries remains to be explored.  
54  
55  
56  
57  
58  
59  
60

1  
2  
3 125 **Registration:** ISRCTN 12131979  
4  
5 126 **Ethics References:** Oxford (Oxford Tropical Research Ethics Committee 39-15)  
6  
7 127 Bangladesh (icddr,b Institutional Review Board PR-15119 )  
8  
9 128 Malawi (National Health Sciences Research Committee  
10  
11 129 15/5/1599)  
12  
13 130 Nepal (Nepal Health Research Council 306/2015)  
14  
15 131  
16  
17 132 **Keywords:**  
18  
19 133 Enteric fever, vaccination programme, infection transmission, *Salmonella* Typhi,  
20  
21 134 *Salmonella* Paratyphi A, serosurveillance, seroepidemiology, healthcare utilisation,  
22  
23 135 resource-limited settings; diagnosis; febrile illness; Africa, Asia.  
24  
25  
26  
27  
28  
29  
30  
31  
32  
33  
34  
35  
36  
37  
38  
39  
40  
41  
42  
43  
44  
45  
46  
47  
48  
49  
50  
51  
52  
53  
54  
55  
56  
57  
58  
59  
60

1  
2  
3 136 **BACKGROUND**

4 137 *Salmonella enterica* serovars Typhi (S. Typhi) and Paratyphi A (S. Paratyphi A), are  
5  
6  
7 138 human-restricted pathogens transmitted by faeco-oral ingestion. The ensuing  
8  
9 139 disease, enteric fever (or 'typhoid fever'), is a non-specific febrile illness which affects  
10  
11 140 an estimated 12-27 million people worldwide each year, resulting in 129,000–  
12  
13 141 223,000 deaths.<sup>1–3</sup> Despite a dramatic reduction in incidence over the last century in  
14  
15 142 most high-income countries, continuing inadequate access to clean water and  
16  
17 143 increasing inter-continental spread of multiply antibiotic-resistant strains hamper  
18  
19 144 disease control efforts especially in resource-limited settings.<sup>3–5</sup> The current burden  
20  
21 145 of disease is highest among children and young adults in South and Southeast Asia<sup>1–</sup>  
22  
23 146 <sup>3</sup> but is increasingly recognized in sub-Saharan Africa.<sup>6</sup>

24  
25 147  
26  
27 148 Recently, a new generation of Vi- conjugate enteric fever vaccines, suitable for use in  
28  
29 149 infants and providing longer lasting protection than those previously licensed,<sup>7–10</sup>  
30  
31 150 have become available. Determining how and where interventions such as  
32  
33 151 vaccination may be best deployed is difficult due to a lack of population-based  
34  
35 152 incidence studies and inaccurate diagnostic tests.<sup>1–3</sup> Improving disease burden  
36  
37 153 estimates and providing data on the epidemiology and transmission of S. Typhi and  
38  
39 154 S. Paratyphi A to inform mathematical models<sup>11–13</sup> could improve the evidence  
40  
41 155 necessary to design comprehensive and effective disease control programmes.<sup>14</sup>

42  
43 156

44  
45 157 **Burden of disease and diagnostics**

46  
47 158 Recent meta-analyses examining global causes of morbidity and mortality estimate  
48  
49 159 that a significant burden of disease worldwide, and especially in South and  
50  
51 160 Southeast Asia, may be attributed to enteric fever.<sup>15–17</sup> The margin of error on these  
52  
53 161 estimates is wide, however; much of the uncertainty regarding the burden of disease  
54  
55 162 caused by typhoidal *Salmonella* is due to the unavailability of accurate diagnostics or  
56  
57 163 misclassification of non-specific disease presentations, in addition to a general lack  
58  
59  
60

1  
2  
3 164 of data.<sup>18</sup> Availability of antibiotics from local pharmacies without prescription,  
4  
5 165 frequent misdiagnosis as malaria, dengue or other febrile illnesses, or the avoidance  
6  
7 166 of hospital due to fear or expense are all likely to result in an underestimate of the  
8  
9 167 true numbers of cases.<sup>19</sup> In contrast, the widespread use of suboptimal diagnostic  
10  
11 168 tests such as the Widal test in areas where exposure to similar bacteria in the  
12  
13 169 environment occurs may lead to inaccurate over-diagnosis of the condition.<sup>20</sup>  
14  
15 170 Previous studies and systematic reviews have attempted to address this inaccuracy  
16  
17 171 by calculating the imprecision associated with insensitive blood culture methods, and  
18  
19 172 applying this correction to blood culture confirmed case numbers.<sup>1,2</sup>  
20  
21 173  
22  
23 174 In addition to a better understanding of the disease burden attributable to typhoidal  
24  
25 175 *Salmonellae*, improved diagnostics and biomarkers are required to improve individual  
26  
27 176 case management.<sup>21</sup> The current gold-standard diagnostic test for  
28  
29 177 typhoid/paratyphoid is blood culture; while this test provides the causative isolate,  
30  
31 178 thereby allowing susceptibility testing and further typing methods to be performed,  
32  
33 179 most laboratories in resource-limited settings lack the infrastructure to perform these  
34  
35 180 assays. Even in ideal conditions, blood culture requires a significant volume of blood  
36  
37 181 to enhance diagnostic yield, and is relatively insensitive even in highly-controlled  
38  
39 182 human challenge settings where sensitivity reaches 80%.<sup>22</sup> Highly sensitive and  
40  
41 183 specific diagnostic tests are a fundamental requirement for surveillance and vaccine  
42  
43 184 efficacy studies, however, both for measuring the number of cases  
44  
45 185 avoided/prevented, but also for reassuring policy makers and funders that vaccine  
46  
47 186 implementation is worth investment. While several rapid serological diagnostic tests  
48  
49 187 have recently been developed, these still rely on a few selected antigens, which are  
50  
51 188 known to be non-specific in endemic communities.<sup>23,24</sup> Newer diagnostic modalities  
52  
53 189 are in development, however, which have utilised serum banks from multiple  
54  
55  
56 190 countries and samples collected from controlled human infection models to identify  
57  
58 191 putative novel antigens for serological assay and further high sensitivity approaches  
59  
60

1  
2  
3 192 including metabolomics and functional genomics.<sup>5,25-27</sup> In addition, several of these  
4  
5 193 newer approaches have demonstrated potential for identifying individuals with  
6  
7 194 probable chronic carriage. Identification and treatment of chronic carriers in a  
8  
9 195 population would significantly improve our understanding of disease dynamics and  
10  
11 196 allow targeted treatment strategies to reduce community transmission of infection.  
12

13  
14  
15 198 Furthermore, whilst utilising these new diagnostic tests in comprehensive passive  
16  
17 199 surveillance or even active surveillance programmes will identify acute cases of  
18  
19 200 typhoid disease, the incidence rate of sub-clinical infection and exposure is unknown.

20  
21 201 These data are likely essential to understanding pathogen transmission as well as  
22  
23 202 the development and maintenance of immunity against clinical disease<sup>12</sup> and are  
24  
25 203 likely only to be obtainable through the use of seroepidemiological methods.

26  
27 204 Previous seroepidemiological studies have examined the cross-sectional age-  
28  
29 205 stratified prevalence of antibodies to the *S. Typhi* flagellar (H) antigen in Santiago,  
30  
31 206 Chile<sup>28</sup>, and serum bactericidal antibody in Kathmandu, Nepal.<sup>29</sup> Also, high antibody  
32  
33 207 titres to the Vi (Vi capsular polysaccharide; virulence factor) antigen of *S. Typhi*  
34  
35 208 measured by agglutination assay have been used to estimate chronic carrier  
36  
37 209 frequency in population-based studies,<sup>30-32</sup> although these studies were not  
38  
39 210 universally successful at identifying chronic carriers.<sup>33</sup> Improvements in serological  
40  
41 211 assays and the discovery of a newer generation of diagnostic antigens<sup>34</sup> suggest that  
42  
43 212 population-based serosurveillance studies, especially using longitudinal  
44  
45 213 measurements, may provide key data regarding the incidence of subclinical infection  
46  
47 214 with the bacterial agents of enteric fever and the prevalence of chronic carriers.

48  
49  
50 215

## 51 216 **Transmission**

52  
53 217 Closely related to the estimate of incidence is the contribution of different typhoid  
54  
55 218 states to ongoing transmission within a community. Acute cases of enteric fever,  
56  
57 219 individuals with subclinical infection, as well as chronic carriers likely all contribute to  
58  
59  
60

1  
2  
3 220 the transmission and maintenance of *S. Typhi* and *S. Paratyphi A* in endemic areas,  
4  
5 221 but not to the same degree. This is an essential area of further research, particularly  
6  
7 222 given the negative impact transmission from chronic carriers could have on the  
8  
9 223 indirect protection afforded by typhoid vaccines.<sup>12</sup> The importance of 'short cycle'  
10  
11 224 transmission via contaminated food and water in the immediate environment versus  
12  
13 225 'long cycle' transmission via the contamination of community water sources is also  
14  
15 226 an area of direct relevance in the control of typhoid fever, primarily through non-  
16  
17 227 vaccine public health interventions including water and sanitation hygiene (WASH)  
18  
19 228 improvements.  
20

21 229

### 23 230 **Bacterial genome variation**

25 231 The enteric fever agents *S. Typhi* and *S. Paratyphi A*, while genetically distinct from  
26  
27 232 other serovars of *Salmonella enterica*, exhibit low genetic diversity and whole  
28  
29 233 genome sequence (WGS) analysis is required to uncover patterns of genetic  
30  
31 234 relatedness between isolates.<sup>35-37</sup> These techniques have been used previously to  
32  
33 235 track the development and spread of antibiotic resistance on a global scale,<sup>6</sup> and  
34  
35 236 have shown potential to accurately track transmission links between individuals,  
36  
37 237 specifically within affected households, in addition to the broader community.<sup>38</sup> One  
38  
39 238 use of this high-resolution typing previously, has been to determine whether isolates  
40  
41 239 obtained from those with acute infection are distinct from those found in chronic gall-  
42  
43 240 bladder carriers.<sup>39</sup>

45 241

### 48 242 **Host susceptibility**

50 243 While environmental risk factors for enteric fever acquisition are thought to be  
51  
52 244 relatively well understood, recent evidence has emerged implicating genetic factors  
53  
54 245 in host susceptibility to infection.<sup>35,36</sup> Many early typhoid genetic susceptibility studies  
55  
56 246 reporting candidate genes were limited by small sample sizes and choice of controls,  
57  
58 247 a recent large-scale genome-wide association study however, has identified a

1  
2  
3 248 specific locus (HLA-DRB1\*405) which confers 5-fold protection against developing  
4  
5 249 typhoid fever.<sup>35</sup> How genetic variation at this site influences protection against  
6  
7 250 typhoid is still under investigation, but may result in functional differences in MHC  
8  
9 251 class II amino acid sequences; in turn, this may influence *S. Typhi* epitope selection  
10  
11 252 and antigen presentation or the scale and format of the host's T-cell response.  
12  
13 253

## 14 254 **Vaccines**

15  
16  
17 255 Vaccines currently available for typhoid are either oral live attenuated bacterial  
18  
19 256 strains or are derived from the *S. Typhi* polysaccharide capsule, called Vi; there are  
20  
21 257 no licensed vaccines against *S. Paratyphi* A or non-typhoidal salmonellae (NTS).  
22  
23 258 Despite recommendations for their use, these vaccines have only sparsely been  
24  
25 259 introduced in high prevalence settings.<sup>7,40</sup> The reasons for this are unclear, but likely  
26  
27 260 include failure of prioritisation and a short fall in advocacy, in addition to technical  
28  
29 261 deficiencies of the vaccines themselves. One common reason cited is the T-cell  
30  
31 262 independent nature of the immune response to the Vi polysaccharide vaccine (ViPS);  
32  
33 263 this renders the vaccine of little use in young children below the age of two years. In  
34  
35 264 addition, this feature means that the immune response does not boost, requiring  
36  
37 265 repeat vaccination to be administered every 3-5 years. As with other thymus-  
38  
39 266 independent vaccines, to overcome this problem the Vi capsule may be chemically  
40  
41 267 conjugated to a protein carrier,<sup>8</sup> as has successfully been done with conjugation of Vi  
42  
43 268 to *Pseudomonas aeruginosa* exotoxin A.<sup>9</sup> Despite demonstrating good  
44  
45 269 immunogenicity and efficacy in field trials,<sup>10,41</sup> the vaccine is still unlicensed. Newer  
46  
47 270 Vi-conjugate vaccines are in development and have progressed to assessment in  
48  
49 271 field-trials,<sup>42,43</sup> and the Oxford human typhoid challenge model.<sup>44</sup> Recent data from  
50  
51 272 the challenge models suggests that the Vi response elicited by the vaccine is high  
52  
53 273 and likely to be protective, at least in naïve healthy adult volunteers with no immunity  
54  
55 274 or those with previous history of infection.<sup>44</sup> Furthermore, a recent study in Indian  
56  
57 275 schoolchildren found a vaccine efficacy of 100% (95% confidence interval, 97.6 to  
58  
59  
60

1  
2  
3 276 100%) after a single dose of Vi conjugated to tetanus toxoid during the first year of  
4  
5 277 follow-up.<sup>43</sup>  
6

7 278  
8  
9 279 The key issue remaining, once safe, well-tolerated, immunogenic vaccines become  
10  
11 280 widely available, is how best to implement them in endemic settings. Currently  
12  
13 281 available surveillance data from most regions is insufficient to demonstrate the age-  
14  
15 282 band with the highest incidence of enteric fever.<sup>45</sup> Designing vaccination strategies to  
16  
17 283 cover the years during which children are most at risk and generating indirect  
18  
19 284 protection by preventing infection among those age groups driving transmission  
20  
21 285 could be facilitated through the use of well-informed mathematical modelling.  
22  
23 286

### 24 25 287 **THE STRATAA STUDY: RATIONALE AND AIMS**

26  
27 288 The STRATAA (Strategic Typhoid alliance across Africa and Asia) study draws  
28  
29 289 together an international team of investigators, field sites, laboratories and research  
30  
31 290 institutes to address many of the key outstanding questions described above  
32  
33 291 regarding the burden of enteric fever and *Salmonella* exposure in endemic regions,  
34  
35 292 the mechanisms of susceptibility and infection transmission. These have been  
36  
37 293 identified as key uncertainties in mathematical models.<sup>11-13</sup> By conducting field  
38  
39 294 studies of the epidemiology and burden of enteric fever across three sites with  
40  
41 295 distinct epidemiological profiles and applying state-of-the-art molecular methods, the  
42  
43 296 goal of the STRATAA study is to collect the data needed to enhance our  
44  
45 297 understanding of pathogen transmission, exposure and susceptibility. These data  
46  
47 298 can then be used to rigorously parameterize and validate models for the transmission  
48  
49 299 dynamics of the agents of enteric fever, such that these models can then be used to  
50  
51 300 evaluate different vaccination strategies and, importantly, help predict the expected  
52  
53 301 impact resulting from the direct and indirect effects of vaccine introduction. These  
54  
55 302 and other overarching objectives of the STRATAA study are listed in **Table 1**.  
56  
57  
58 303



304 **Table 1. Overarching objectives of the STRATAA study.**

|                            |                                                                                                            |
|----------------------------|------------------------------------------------------------------------------------------------------------|
| <b>Primary</b>             | To characterise the burden of enteric fever at three urban sites in Africa and Asia                        |
| <b>Secondary</b>           | Assess the burden/incidence of enteric fever                                                               |
|                            | Assess the seroincidence of infection                                                                      |
|                            | Assess host factors affecting burden/incidence/transmission of enteric fever                               |
|                            | Assess effect of pathogen genetics on burden/incidence/transmission of enteric fever                       |
|                            | Develop diagnostic tools for rapid and consistent typhoid diagnosis                                        |
|                            | Develop transmission modelling and modelling of vaccine introduction impact                                |
| <b>Tertiary Objectives</b> | Strengthen research capacity in enteric fever endemic regions                                              |
|                            | Provide data to appropriate institutes and governments to advocate vaccine implementation                  |
|                            | To characterise the burden of invasive NTS and other invasive pathogens at an urban site in Malawi, Africa |

305

306 To deliver on these objectives, the following studies will be performed in parallel at  
 307 each of the three chosen field sites, starting in May 2016 with activities continuing  
 308 until October 2018. Firstly, in a well-defined population catchment of  
 309 approximately 100,000 individuals, a detailed demographic census survey will be  
 310 undertaken. Secondly, in healthcare facilities utilised by the census population (as  
 311 confirmed through a healthcare utilisation survey) prospective passive surveillance to  
 312 detect cases of enteric fever will be performed. Thirdly, a seroincidence study will be

1  
2  
3 313 conducted in an age-stratified sample of the census population at each site,  
4  
5 314 collecting blood samples at intervals to estimate the rate of seroconversion to  
6  
7 315 typhoidal *Salmonella* antigens and hence the rate of subclinical/asymptomatic  
8  
9 316 exposure to these bacteria in the general population.  
10

11 317  
12  
13 318 To meet the further objectives, which include evaluating diagnostic tests, identifying  
14  
15 319 antimicrobial resistance patterns, exploring host susceptibility and bacterial  
16  
17 320 virulence/genomic variation, biological samples, specimens and metadata will be  
18  
19 321 collected during these individual studies. Data will be pooled to inform transmission  
20  
21 322 dynamic and health economic models that can be used to help design future vaccine  
22  
23 323 effectiveness studies and evaluate vaccine delivery strategies for widespread  
24  
25 324 deployment.  
26

27 325

## 28 326 **STUDY SITES**

29  
30  
31 327 With known high incidence throughout South and Southeast Asia and a recent  
32  
33 328 increase in reported cases from sub-Saharan Africa<sup>46,47</sup> three sites were selected  
34  
35 329 from across Africa and Asia based on known high rates of enteric fever and the  
36  
37 330 research capacity to deliver a study of this size and logistical complexity. The three  
38  
39 331 sites differ in their epidemiological profiles and history of enteric fever incidence.  
40

41 332

### 42 333 ***Dhaka, Bangladesh***

43  
44 334 Mirpur is an area located within Dhaka Metropolitan area, Bangladesh (**Figure 1A**),  
45  
46 335 situated 7km north-west of the International Centre for Diarrhoeal Disease Research,  
47  
48 336 Bangladesh (icddr,b) main campus. The icddr,b manages two hospitals in Dhaka  
49  
50 337 city, one in the main campus in Dhaka (the main hospital) and another in the Mirpur  
51  
52 338 area known as MTC (Mirpur Treatment Centre) comprising a 50-bed inpatient facility.  
53  
54 339 As part of this programme, these and other health facilities (ten or more total) will be  
55  
56 340 kept under careful surveillance for enteric fever in the census area. The total  
57  
58  
59  
60

1  
2  
3 341 catchment area for the field site for the STRATAA study is 10.79 km<sup>2</sup> with a total  
4  
5 342 population of about 603,658 at a density of 55946/km<sup>2</sup>. Approximately 98% of  
6  
7 343 residents have access to tap water supplied by the municipality while the remainder  
8  
9 344 use wells, hand pumps and other sources such as ponds and rivers in the study  
10  
11 345 area.

12  
13 346  
14  
15 347 Previous data from blood culture surveillance revealed a high incidence of disease  
16  
17 348 within Dhaka, with the burden particularly high in children under 5 years of age  
18  
19 349 (estimated at 18.7 episodes/1000 person-years in this age group). The current S.  
20  
21 350 Typhi:Paratyphi ratio is approximately 5:1. Typhoid fever is reported throughout the  
22  
23 351 year but peaks during the monsoon season.<sup>48,49</sup> Of note, 15% of S. Typhi isolates are  
24  
25 352 multi-drug resistant (MDR) and around 97% isolates are resistant to nalidixic acid<sup>50</sup>;  
26  
27 353 extended-spectrum beta-lactamase (ESBL) producing organisms have also been  
28  
29 354 isolated from enteric fever patients in this setting.

30  
31  
32  
33 355  
34 356 ***Blantyre, Malawi***

35  
36 357 Ndirande is a large urban township on the outskirts of Blantyre city, Malawi, 6km  
37  
38 358 from the main referral hospital (**Figure 1B**). It has a young population of around  
39  
40 359 100,000 people spread over 6.77km<sup>2</sup>. It is serviced by one health clinic staffed by  
41  
42 360 clinical officers. It has high reported rates of typhoid fever along with a population  
43  
44 361 HIV prevalence of around 18%.<sup>51</sup> Queen Elizabeth Central Hospital (QECH) in  
45  
46 362 Blantyre, Malawi, is the government-funded hospital for Blantyre district, serving a  
47  
48 363 local population of 1.3 million persons and provides tertiary care to southern Malawi.

49  
50 364  
51  
52 365 NTS have previously been the commonest cause of invasive bloodstream infections  
53  
54 366 in Blantyre,<sup>52</sup> but since 2011 there has been a rapid increase in the number of S.  
55  
56 367 Typhi cases seen at QECH, from approximately 14/year between 1998 and 2010 to  
57  
58 368 782 in 2014.<sup>46</sup> Much of this increase has been due to the emergence of the H58

1  
2  
3 369 clone and is associated with an MDR phenotype<sup>47,53</sup>. This outbreak appears  
4  
5 370 unrelated to HIV-infection, but has resulted in high rates of mortality (2.5% adult and  
6  
7 371 paediatric) despite the availability of fluoroquinolone antibiotics.<sup>47</sup> In this setting,  
8  
9 372 enteric fever is seasonal, with the peak number of cases seen at the end of the wet  
10  
11 373 season and during the early dry season when the prevalence of malnutrition is also  
12  
13 374 highest.

14  
15 375  
16  
17 376 ***Patan, Nepal***

18  
19 377 Patan is located within the Lalitpur Sub-Metropolitan City (LSMC) within the  
20  
21 378 Kathmandu Valley, Nepal (**Figure 1C**). The population is generally poor, with most  
22  
23 379 living in overcrowded conditions and obtaining their water from stone spouts or  
24  
25 380 sunken wells. Patan Hospital is a 318-bed government hospital providing emergency  
26  
27 381 and elective outpatient and inpatient services to this area. The local catchment  
28  
29 382 population of the hospital is approximately 200,000 people in about 20 km<sup>2</sup>, with a  
30  
31 383 population density of 8,000/km<sup>2</sup>; there is a high rate of immigration for employment,  
32  
33 384 particularly young males from rural areas. Enteric fever is frequently managed in the  
34  
35 385 outpatient clinic at Patan Hospital, which has approximately 200,000 outpatient visits  
36  
37 386 annually.

38  
39 387  
40  
41 388 Uptake of typhoid Vi vaccination is limited and natural exposure/subclinical infection  
42  
43 389 is common.<sup>29</sup> Approximately 400 culture confirmed cases of enteric fever are  
44  
45 390 diagnosed at Patan Hospital each year, with a peak during the monsoon months. The  
46  
47 391 current *S. Typhi*:*Paratyphi A* ratio is approximately 1:1.<sup>54</sup> Antimicrobial resistance is  
48  
49 392 more commonly observed in *S. Paratyphi A* isolates; however, emergence of  
50  
51 393 fluoroquinolone resistant *S. Typhi* isolates has also been recently identified,<sup>55</sup>  
52  
53 394 whereas MDR strains of either serovar are rare.<sup>38</sup>

54  
55  
56 395  
57  
58  
59  
60

1  
2  
3 396 **METHODS**  
4

5 397 **POPULATION CENSUS**  
6

7 398 In order to accurately calculate an incidence rate of typhoid fever for each of the  
8  
9 399 study sites, a demographic census will be performed at baseline and repeated at 2  
10  
11 400 years. The objective of the census is to identify/characterise the source population  
12  
13 401 corresponding to the catchment areas for the passive surveillance sites described  
14  
15 402 below, and estimate the person-time under surveillance.  
16

17 403

18  
19 404 Census data will be updated with births, deaths and migrations every six months in  
20  
21 405 Dhaka and Patan, and at two years in Blantyre. The number of participants for the  
22  
23 406 demographic census survey in each site needed to produce a two-sided 95%  
24  
25 407 confidence interval with a precision (half-width) of 50% for the anticipated typhoid  
26  
27 408 incidence rate detected through passive clinical surveillance has been calculated  
28  
29 409 (**Table 2**). The necessary catchment population size is driven by the size required to  
30  
31 410 estimate the expected incidence rate in the 0-4 year-old age group, which is  
32  
33 411 estimated to be approximately 10% of the total population in each site.  
34

35 412

36 413  
37  
38  
39  
40  
41  
42  
43  
44  
45  
46  
47  
48  
49  
50  
51  
52  
53  
54  
55  
56  
57  
58  
59  
60

414 **Table 2. Sample size required for the target populations in the three sites to**  
 415 **estimate annual, blood culture-confirmed typhoid incidence in passive clinical**  
 416 **surveillance.**

| Age groups | Anticipated typhoid incidence per 1000 persons* | Precision or half-width | Sample-size required |
|------------|-------------------------------------------------|-------------------------|----------------------|
| 0-4 years  | 1.5                                             | 0.75                    | 10,125               |
| 5-14 years | 1.0                                             | 0.5                     | 15,119               |
| >14 years  | 0.5                                             | 0.25                    | 29,801               |

417 \* Assumed age-specific incidence rates (based on data from Dhaka, Bangladesh,  
 418 Delhi, India, and Dong Thap, Vietnam).

419  
 420 The census will take place within a demarcated geographic area that is a known  
 421 catchment population for the surveillance sites (**Figure 1**). In total, at least 100,000  
 422 individuals will be enumerated from  $\geq 20,000$  households. The head/key informant  
 423 within the household will provide written informed consent to take part in the study.  
 424 Information on all residents within the household at the time of the census will be  
 425 gathered from the head of the household/key informant.

426  
 427 A household is defined as individuals living in the same dwelling or compound and  
 428 sharing food from the same kitchen. A household member is considered to have  
 429 migrated out if s/he has left the household and does not intend to come back within  
 430 six months of the time s/he left. A person is considered to have migrated in if s/he  
 431 was not previously included in the list of household members and intends to live in  
 432 the household for the next six months. At enrolment, the head of each household will

1  
2  
3 433 be made aware of the passive surveillance component of the study and encouraged  
4  
5 434 to use the field-site facilities capturing acute febrile illnesses, including acute enteric  
6  
7 435 fever cases. The characterised census population will form the sampling frame for  
8  
9 436 the further components (passive surveillance, healthcare utilisation/WASH surveys  
10  
11 437 and serosurvey) described below.  
12

13  
14

### 15 439 **PASSIVE SURVEILLANCE**

16  
17 440 The passive surveillance component of STRATAA is designed to capture cases of  
18  
19 441 febrile disease occurring in each of the three census populations. Patients presenting  
20  
21 442 to any of the clinical surveillance sites with a history of subjective fever >72 hours or  
22  
23 443 objective fever >38.5 °C on presentation will be approached for enrolment.  
24

25  
26

27 445 An index case will be defined as an individual with a blood culture result confirming  
28  
29 446 infection with *S. Typhi* or *S. Paratyphi A* (or NTS in Malawi), and whose household is  
30  
31 447 included in the census survey. These cases will be used to calculate the disease  
32  
33 448 incidence in each of the three census sites. Consenting individuals will have samples  
34  
35 449 of blood, urine and stool collected to determine a diagnosis of *S. Typhi*, *S. Paratyphi*  
36  
37 450 *A* or NTS and to provide material for the further diagnostic and genetic aims of the  
38  
39 451 study (**Supplemental Table 1**). Patients not resident in the census area will be  
40  
41 452 enrolled as additional cases for the laboratory and genetic components of the  
42  
43 453 programme if written consent is provided.  
44

45  
46

### 47 455 **HEALTHCARE UTILISATION AND WATER, SANITATION AND HYGIENE**

#### 48 456 **SURVEYS**

49  
50  
51 457 To characterise the healthcare-seeking behaviour of individuals living in the census  
52  
53 458 areas, at least 735 households will be randomly selected from the census area at  
54  
55 459 each site to participate in a healthcare utilisation survey. Data will be collected from  
56  
57 460 the head of the household/key informant to describe the actual and hypothetical  
58  
59  
60

1  
2  
3 461 usage of healthcare facilities for febrile episodes. The aim of this component is to  
4  
5 462 estimate the percent of cases (fulfilling the fever case definition) in each age stratum  
6  
7 463 (0-4 years, 5-14 years and >14 years of age) who would or would not seek attention  
8  
9 464 at one of the designated passive surveillance health facilities. Additional data  
10  
11 465 regarding sanitation and hygiene facilities and usage will also be collected. Annual  
12  
13 466 data collection periods will coincide with the peak typhoid season at each of the three  
14  
15 467 sites.  
16  
17 468

### 19 469 **SEROSURVEYS**

20  
21 470 To estimate the seroincidence and seroprevalence of clinical (both formally  
22  
23 471 diagnosed and undiagnosed cases) and subclinical infection or exposure to *S. Typhi*  
24  
25 472 and *S. Paratyphi*, systematic serosurveillance will be performed at each site. Blood  
26  
27 473 samples will be collected at baseline and 3 months later, with sample collection  
28  
29 474 initiated in an on-going basis over the course of one year (**Table 3**). To identify  
30  
31 475 participants for the serosurvey, an age-stratified approach will be used to randomly  
32  
33 476 select individuals from the census population from each age group. Suitable  
34  
35 477 participants will be enrolled by field workers; where the individual identified is not  
36  
37 478 available, a household member in the same age group will be selected. Where this is  
38  
39 479 not possible further households will be randomised into this component to ensure  
40  
41 480 adequate numbers of individuals in the different age groups.  
42  
43  
44 481

45  
46 482 Seroincidence (indicative of recent infection) will be calculated by measuring the rate  
47  
48 483 of seroconversion to anti-H(d) (anti-flagellin) IgG and other acute phase antibodies  
49  
50 484 between both time points, with the denominator consisting only of individuals  
51  
52 485 sampled twice and seronegative at the first time point.<sup>56</sup>  
53  
54 486

55  
56 487 **Table 3. Sample size calculations for the serological surveys to estimate age-**  
57  
58 488 **specific rates of high titres of serum IgG anti-H(d) antibodies.** Assumes age-



489 stratified individual sampling; also accounts for detection of 1% chronic carriage rate  
 490 in  $\geq 10$  year olds.

|              | Anticipate<br>d sero-<br>incidence<br>(%) | Number<br>of initial<br>samples | Anticipat<br>ed<br>number<br>of<br>events | No. of<br>follow-<br>up<br>samples<br>* | No. of<br>events<br>detected | Binomial<br>[95% | Exact<br>CI] | Probabili<br>ty of<br>observin<br>g 0<br>events |
|--------------|-------------------------------------------|---------------------------------|-------------------------------------------|-----------------------------------------|------------------------------|------------------|--------------|-------------------------------------------------|
| 0-4 yrs      | 0.2                                       | 2500                            | 5                                         | 2000                                    | 4                            | 0.0005           | 0.0051       | 0.0182                                          |
| 5-9 yrs      | 0.4                                       | 1300                            | 5.2                                       | 1040                                    | 4                            | 0.0010           | 0.0098       | 0.0155                                          |
| 10-14<br>yrs | 0.8                                       | 800                             | 6.4                                       | 640                                     | 5                            | 0.0025           | 0.0181       | 0.0059                                          |
| >14 yrs      | 0.2                                       | 3900                            | 7.8                                       | 3120                                    | 6                            | 0.0007           | 0.0042       | 0.0019                                          |
| <b>TOTAL</b> |                                           | <b>8500</b>                     | <b>24.2</b>                               | <b>6800</b>                             | <b>19</b>                    |                  |              |                                                 |

491 \*Assuming 5% migration and 15% refusal

492

493 The seroprevalence of anti-Vi IgG will also be measured at baseline to identify  
 494 individuals who could be potential chronic carriers. Previous studies have used high  
 495 anti-Vi IgG antibody levels in serum as a marker of chronic carriage, and our aim is  
 496 to use a recently validated/approved anti-Vi ELISA method to determine possible  
 497 rates of chronic carriage across the three populations.<sup>32,57,58</sup> In order to validate this  
 498 method and to identify possible chronic carriers in the population (in addition to  
 499 identifying whether there may be specific host genetic risk factors for chronic  
 500 carriage), those individuals with a 'high' serum anti-Vi IgG titre will be re-approached  
 501 and asked to provide two stool samples within 48 hours. With the agreement of  
 502 relevant local ethics committees, identified chronic carriers (confirmed high anti-Vi  
 503 IgG serum sample with a positive stool culture) will be treated with antibiotics for  
 504 chronic carriage and clearance of bacterial shedding will be confirmed.

1  
2  
3 5054  
5 506 **HOUSEHOLD CONTACTS**

6  
7 507 To further investigate possible transmission links, household contacts of index cases  
8  
9 508 presenting with blood-culture confirmed *S. Typhi* or *S. Paratyphi A* infection will be  
10  
11 509 identified through the census data collection and approached to take part in this  
12  
13 510 component of the study. Up to five members of the household, with consent, will be  
14  
15 511 asked to provide a blood and stool sample at the time of discharge of the index case,  
16  
17 512 a further stool sample at one month and repeat serology at six months  
18  
19 513 (**Supplemental Table 1**), and asked about the occurrence of symptoms. These  
20  
21 514 samples will be investigated to identify those with subclinical infection or possible  
22  
23 515 chronic carriers. Secondary attack rates for the occurrence of symptomatic infection  
24  
25 516 will be estimated. If serology suggests chronic carriage in a household contact,  
26  
27 517 additional blood and stool samples will be collected to confirm this, and antimicrobial  
28  
29 518 treatment to eradicate carriage will be proposed.

30  
31 519

32  
33 520 Those individuals who are identified as shedding bacteria but without high serum  
34  
35 521 anti-Vi IgG levels will be followed up at a one-year interval to repeat stool culture.  
36  
37 522 Repeat blood samples will be collected from household contacts approximately 3  
38  
39 523 months after initial sampling to explore whether rates of seroconversion are higher in  
40  
41 524 these individuals compared with those in the general population. At least 73  
42  
43 525 households of index cases are expected to be enrolled in this component of the  
44  
45 526 study.

46  
47  
48 527

49 528 In a similar approach to the acute cases of typhoid infection, where chronic carriers  
50  
51 529 are identified from the serosurveys, household transmission studies will be  
52  
53 530 performed among household contacts of possible chronic carriers (i.e. those with a  
54  
55 531 'high' serum anti-Vi IgG titre). A one-time attempt will be made to enroll up to five  
56  
57 532 members of the household, sampling serology and stool looking for evidence of  
58  
59  
60

1  
2  
3 533 typhoid infection. This will provide data on secondary attack rates for both acute and  
4  
5 534 chronic typhoid states.

6  
7 535

## 8 9 536 **DATA MANAGEMENT AND ANALYSIS**

10  
11 537 Census and serosurvey data collection forms will be developed through a structured  
12  
13 538 iterative process and then implemented using Open Data Kit<sup>59</sup>, a system enabling  
14  
15 539 electronic mobile data collection, with customizations by Nafundi, USA, on Android-  
16  
17 540 based tablets. Each household within the census will be assigned a unique study ID  
18  
19 541 and geo-located using GPS where possible; individuals will be given a member  
20  
21 542 number within the household. This information will be collected by local enumerators  
22  
23 543 over a one- to four-month period via these forms and adapted to the three  
24  
25 544 geographic settings. Data will be uploaded onto MySQL databases, where SQL  
26  
27 545 routines will be run nightly to enforce data cleaning on critical variables beyond  
28  
29 546 ODK's validation routines. Daily anonymized data will be backed up from the three  
30  
31 547 sites centrally. For the passive surveillance and household contacts studies a  
32  
33 548 combination of tablet and paper based case report forms will be used to capture the  
34  
35 549 data. Data from paper forms will be transcribed onto electronic databases using  
36  
37 550 Open Clinica<sup>60</sup>. Database reports and descriptive analyses will be generated weekly.  
38  
39 551 To assess efficiency and quality of data capture, the volume, accuracy and time of  
40  
41 552 data collection can be quantified.

42  
43 553 The distribution and burden of enteric illness is likely to vary between countries and  
44  
45 554 thus analyses will be conducted separately for each country. Where data are  
46  
47 555 combined across countries, an adjustment for country differences will be included in  
48  
49 556 statistical models.

50  
51 557

## 52 53 558 **ETHICS**

54  
55 559 Written informed consent will be obtained from the head of each household (as the  
56  
57 560 "key informant") on behalf of the entire household in the demographic census and  
58  
59  
60

1  
2  
3 561 healthcare utilisation surveys. In each of the other components, individual written  
4  
5 562 informed consent will be obtained from individuals over the age of 18 or by a  
6  
7 563 parent/guardian from individuals below this age with additional assent sought from  
8  
9 564 those between 11-17 years old.

10  
11 565 This protocol has received ethics approval from the Oxford Tropical Research Ethics  
12  
13 566 Committee, the Malawian National Health Sciences Research Committee and  
14  
15 567 University of Malawi Research Ethics Committee, the Nepal Health Research  
16  
17 568 Council and the icddr, b Institutional Review Board.

18  
19  
20 569

## 21 570 **DISSEMINATION**

22  
23 571 We hope to make the results from these studies widely available and plan to  
24  
25 572 disseminate our analyses in international peer-reviewed journals. Investigators will  
26  
27 573 be involved in reviewing drafts of the manuscripts, abstracts, press releases and any  
28  
29 574 other publications arising from the study. Furthermore, data from these studies will  
30  
31 575 also be used in the submission of post-doctoral theses.

32  
33  
34 576

## 35 577 **COMMUNITY PUBLIC ENGAGEMENT**

36  
37 578 A collection of specific activities engaging the local population with both the subject  
38  
39 579 of typhoid fever and the activities of the study have been carried out. In Malawi for  
40  
41 580 example, community leaders have been informed and consulted on certain aspects  
42  
43 581 of the study, shown the proposed activities of study teams and given tours of  
44  
45 582 research facilities. There has been engagement with various forms of media  
46  
47 583 disseminating information on the importance of typhoid and study aims. In Nepal,  
48  
49 584 field staff have been given detailed information to communicate to the local  
50  
51 585 populations.

52  
53 586 Further activities are planned to ensure the local populations are informed and  
54  
55 587 engaged.

56  
57  
58 588  
59  
60

1  
2  
3 589 **DISCUSSION**

4  
5 590 The STRATAA study is a comprehensive multicentre study aiming to improve  
6  
7 591 understanding of typhoidal *Salmonella* infection in high-risk endemic populations.  
8  
9 592 This study has been designed to answer key questions and data gaps identified  
10  
11 593 through an innovative application of recent mathematical modelling. These include  
12  
13 594 measuring the burden of age-stratified disease, identifying the relative contribution of  
14  
15 595 asymptomatic/subclinical *Salmonella* infection/exposure, and estimating the  
16  
17 596 contribution to ongoing transmission from the chronic carrier state. These data will  
18  
19 597 inform further modelling required to develop and optimise disease control and  
20  
21 598 prevention strategies that will eventually lead to disease elimination.  
22

23 599

24  
25 600 **Figure Legends**

26  
27 601 **Figure 1. Description of STRATAA study field sites, demonstrating (i) the**  
28  
29 602 **location of the three sampling sites in (A) Mirpur (Dhaka, Bangladesh), (B)**  
30  
31 603 **Ndirande (Blantyre, Malawi) and (C) Patan (Kathmandu, Nepal), (ii) the**  
32  
33 604 **historical number of typhoid cases detected per month at each site (*blue box***  
34  
35 605 **marks the annual monsoon season).**  
36

37 606  
38  
39  
40  
41  
42  
43  
44  
45  
46  
47  
48  
49  
50  
51  
52  
53  
54  
55  
56  
57  
58  
59  
60

1  
2  
3 607 **COMPETING INTERESTS**

4  
5 608 AJP chairs the UK Department of Health's (DH) Joint Committee on Vaccination and  
6  
7 609 Immunisation (JCVI) and the European Medicines Agency (EMA) Scientific Advisory  
8  
9 610 Group on Vaccines and is a member of WHO's SAGE. The views expressed in this  
10  
11 611 manuscript do not necessarily reflect those of JCVI, DH, EMA or WHO. AJP has  
12  
13 612 previously conducted clinical trials on behalf of the University of Oxford funded by  
14  
15 613 vaccine manufacturers but has no personal financial interests.  
16

17  
18  
19 614

20  
21 615 **FUNDING**

22  
23 616 Funding for the STRATAA study has been provided by a Wellcome Trust Strategic  
24  
25 617 Award (No. 106158/Z/14/Z) and the Bill and Melinda Gates Foundation (No.  
26  
27 618 OPP1141321).  
28  
29 619 The Malawi-Liverpool-Wellcome Programme and the Oxford University Clinical  
30  
31 620 Research Unit in Vietnam are supported by the Wellcome Trust with Major Overseas  
32  
33 621 Programme core awards. Neither funding body had any role in designing the study,  
34  
35 622 writing this manuscript or the decision to submit.

36  
37 623

38  
39 624 **Authors contributions**

40  
41 625 SB, BB, JDC, GD, CD, MAG, RSH, VEP, FQ, KZ, SD, KH and AJP contributed to the  
42  
43 626 conception and design of the study. ST drafted the protocol of the study. This  
44  
45 627 manuscript was drafted by TD and JM. SB, BB, JDC, GD, SD, CD, MAG, KH, RSH,  
46  
47 628 VEP, FQ, ST, KZ, MAK, FK, MS, DT and AJP read and critically revised the protocol  
48  
49 629 and this manuscript prior to submission.

50  
51 630

52  
53 631

54  
55 632

56  
57 633 1. Crump, J. A. & Mintz, E. D. Global trends in typhoid and paratyphoid Fever.

58  
59 634 *Clin. Infect. Dis.* **50**, 241–6 (2010).  
60

- 1  
2  
3 635 2. Buckle, G. C., Walker, C. L. F. & Black, R. E. Typhoid fever and paratyphoid  
4 fever: Systematic review to estimate global morbidity and mortality for 2010. *J.*  
5 636 *Glob. Health* **2**, 10401 (2012).  
6  
7 637  
8
- 9 638 3. Mogasale, V. *et al.* Burden of typhoid fever in low-income and middle-income  
10 countries: a systematic, literature-based update with risk-factor adjustment.  
11 639 *Lancet. Glob. Heal.* **2**, e570-80 (2014).  
12 640
- 13 641 4. Arndt, M. B. *et al.* Estimating the Burden of Paratyphoid A in Asia and Africa.  
14 *PLoS Negl. Trop. Dis.* **8**, e2925 (2014).  
15 642
- 16 643 5. Darton, T. C., Blohmke, C. J. & Pollard, A. J. Typhoid epidemiology,  
17 644 diagnostics and the human challenge model. *Curr. Opin. Gastroenterol.* **30**, 7–  
18 645 17 (2014).  
19
- 20 646 6. Wong, V. K. *et al.* Phylogeographical analysis of the dominant multidrug-  
21 647 resistant H58 clade of *Salmonella* Typhi identifies inter- and intracontinental  
22 648 transmission events. *Nat. Genet.* **47**, 632–639 (2015).  
23 649
- 24 650 7. WHO | WHO/IVB/12.02. WHO (2013).  
25 651
- 26 652 8. Szu, S. C. Development of Vi conjugate – a new generation of typhoid  
27 653 vaccine. *Expert Rev. Vaccines* **12**, 1273–1286 (2013).  
28 654
- 29 655 9. Szu, S. C., Stone, A. L., Robbins, J. D., Schneerson, R. & Robbins, J. B. Vi  
30 656 capsular polysaccharide-protein conjugates for prevention of typhoid fever.  
31 657 Preparation, characterization, and immunogenicity in laboratory animals. *J.*  
32 658 *Exp. Med.* **166**, 1510–24 (1987).  
33 659
- 34 660 10. Lin, F. Y. C. *et al.* The Efficacy of a *Salmonella typhi* Vi Conjugate Vaccine in  
35 661 Two-to-Five-Year-Old Children. *N. Engl. J. Med.* **344**, 1263–1269 (2001).  
36 662
- 37 663 11. Saul, A., Smith, T. & Maire, N. Stochastic Simulation of Endemic *Salmonella*  
38 664 enterica Serovar Typhi: The Importance of Long Lasting Immunity and the  
39 665 Carrier State. *PLoS One* **8**, e74097 (2013).  
40 666
- 41 667 12. Pitzer, V. E. *et al.* Predicting the Impact of Vaccination on the Transmission  
42 668 Dynamics of Typhoid in South Asia: A Mathematical Modeling Study. *PLoS*  
43 669  
44 670  
45 671  
46 672  
47 673  
48 674  
49 675  
50 676  
51 677  
52 678  
53 679  
54 680  
55 681  
56 682  
57 683  
58 684  
59 685  
60 686

- 1  
2  
3 663 *Negl. Trop. Dis.* **8**, e2642 (2014).  
4  
5 664 13. Watson, C. H. & Edmunds, W. J. A review of typhoid fever transmission  
6  
7 665 dynamic models and economic evaluations of vaccination. *Vaccine* **33 Suppl**  
8  
9 666 **3**, C42-54 (2015).  
10  
11 667 14. Crump, J. A., Ram, P. K., Gupta, S. K., Miller, M. A. & Mintz, E. D. Part I.  
12  
13 668 Analysis of data gaps pertaining to *Salmonella enterica* serotype Typhi  
14  
15 669 infections in low and medium human development index countries, 1984-2005.  
16  
17 670 *Epidemiol. Infect.* **136**, 436–48 (2008).  
18  
19 671 15. Havelaar, A. H. *et al.* World Health Organization Global Estimates and  
20  
21 672 Regional Comparisons of the Burden of Foodborne Disease in 2010. *PLOS*  
22  
23 673 *Med.* **12**, e1001923 (2015).  
24  
25 674 16. Murray, C. J. L. *et al.* Disability-adjusted life years (DALYs) for 291 diseases  
26  
27 675 and injuries in 21 regions, 1990-2010: a systematic analysis for the Global  
28  
29 676 Burden of Disease Study 2010. *Lancet (London, England)* **380**, 2197–223  
30  
31 677 (2012).  
32  
33 678 17. Kyu, H. H. *et al.* Global and National Burden of Diseases and Injuries Among  
34  
35 679 Children and Adolescents Between 1990 and 2013. *JAMA Pediatr.* **170**, 267  
36  
37 680 (2016).  
38  
39 681 18. Mogasale, V., Ramani, E., Mogasale, V. V & Park, J. What proportion of  
40  
41 682 *Salmonella* Typhi cases are detected by blood culture? A systematic literature  
42  
43 683 review. *Ann. Clin. Microbiol. Antimicrob.* **15**, 32 (2016).  
44  
45 684 19. Mogasale, V. *et al.* Revisiting typhoid fever surveillance in low and middle  
46  
47 685 income countries: lessons from systematic literature review of population-  
48  
49 686 based longitudinal studies. *BMC Infect. Dis.* **16**, 35 (2016).  
50  
51 687 20. Olopoenia, L. A. & King, A. L. Widal agglutination test - 100 years later: still  
52  
53 688 plagued by controversy. *Postgrad. Med. J.* **76**, 80–4 (2000).  
54  
55 689 21. Baker, S. *et al.* Searching for the elusive typhoid diagnostic. *BMC Infect. Dis.*  
56  
57 690 **10**, 45 (2010).  
58  
59  
60



- 1  
2  
3 691 22. Waddington, C. S. *et al.* An Outpatient, Ambulant-Design, Controlled Human  
4  
5 692 Infection Model Using Escalating Doses of Salmonella Typhi Challenge  
6  
7 693 Delivered in Sodium Bicarbonate Solution. *Clin. Infect. Dis.* **58**, 1230–1240  
8  
9 694 (2014).
- 10  
11 695 23. Keddy, K. H. *et al.* Sensitivity and specificity of typhoid fever rapid antibody  
12  
13 696 tests for laboratory diagnosis at two sub-Saharan African sites. *Bull. World*  
14  
15 697 *Health Organ.* **89**, 640–7 (2011).
- 16  
17 698 24. Parry, C. M., Wijedoru, L., Arjyal, A. & Baker, S. The utility of diagnostic tests  
18  
19 699 for enteric fever in endemic locations. *Expert Rev. Anti. Infect. Ther.* **9**, 711–  
20  
21 700 725 (2011).
- 22  
23 701 25. Näsström, E. *et al.* *Salmonella* Typhi and *Salmonella* Paratyphi A elaborate  
24  
25 702 distinct systemic metabolite signatures during enteric fever. *Elife* **3**, e56971  
26  
27 703 (2014).
- 28  
29 704 26. Thompson, L. J. *et al.* Transcriptional response in the peripheral blood of  
30  
31 705 patients infected with *Salmonella enterica* serovar Typhi. *Proc. Natl. Acad. Sci.*  
32  
33 706 **106**, 22433–22438 (2009).
- 34  
35 707 27. Blohmke, C. J. *et al.* Interferon-driven alterations of the host's amino acid  
36  
37 708 metabolism in the pathogenesis of typhoid fever. *J. Exp. Med.* **213**, 1061–1077  
38  
39 709 (2016).
- 40  
41 710 28. Levine, M. M., Black, R. E. & Lanata, C. Precise estimation of the numbers of  
42  
43 711 chronic carriers of *Salmonella typhi* in Santiago, Chile, an endemic area. *J.*  
44  
45 712 *Infect. Dis.* **146**, 724–6 (1982).
- 46  
47 713 29. Pulickal, A. S. *et al.* Kinetics of the Natural, Humoral Immune Response to  
48  
49 714 *Salmonella enterica* Serovar Typhi in Kathmandu, Nepal. *Clin. Vaccine*  
50  
51 715 *Immunol.* **16**, 1413–1419 (2009).
- 52  
53 716 30. Levine, M. M. *et al.* Diagnostic value of the Widal test in areas endemic for  
54  
55 717 typhoid fever. *Am. J. Trop. Med. Hyg.* **27**, 795–800 (1978).
- 56  
57 718 31. Lanata, C. F. *et al.* Vi serology in detection of chronic *Salmonella typhi* carriers  
58  
59  
60

- 1  
2  
3 719 in an endemic area. *Lancet (London, England)* **2**, 441–3 (1983).  
4  
5 720 32. Nolan, C. M. *et al.* Evaluation of a new assay for Vi antibody in chronic carriers  
6  
7 721 of *Salmonella typhi*. *J. Clin. Microbiol.* **12**, 22–6 (1980).  
8  
9 722 33. Gupta, A. *et al.* Evaluation of community-based serologic screening for  
10  
11 723 identification of chronic *Salmonella Typhi* carriers in Vietnam. *Int. J. Infect. Dis.*  
12  
13 724 **10**, 309–314 (2006).  
14  
15 725 34. Liang, L. *et al.* Immune profiling with a *Salmonella Typhi* antigen microarray  
16  
17 726 identifies new diagnostic biomarkers of human typhoid. *Sci. Rep.* **3**, 1043  
18  
19 727 (2013).  
20  
21 728 35. Dunstan, S. J. *et al.* Variation at HLA-DRB1 is associated with resistance to  
22  
23 729 enteric fever. *Nat. Genet.* **46**, 1333–1336 (2014).  
24  
25 730 36. Dunstan, S. J. *et al.* A TNF region haplotype offers protection from typhoid  
26  
27 731 fever in Vietnamese patients. *Hum. Genet.* **122**, 51–61 (2007).  
28  
29 732 37. Holt, K. E. *et al.* High-throughput sequencing provides insights into genome  
30  
31 733 variation and evolution in *Salmonella Typhi*. *Nat. Genet.* **40**, 987–993 (2008).  
32  
33 734 38. Baker, S. *et al.* Combined high-resolution genotyping and geospatial analysis  
34  
35 735 reveals modes of endemic urban typhoid fever transmission. *Open Biol.* **1**,  
36  
37 736 (2011).  
38  
39 737 39. Dongol, S. *et al.* The Microbiological and Clinical Characteristics of Invasive  
40  
41 738 *Salmonella* in Gallbladders from Cholecystectomy Patients in Kathmandu,  
42  
43 739 Nepal. *PLoS One* **7**, e47342 (2012).  
44  
45 740 40. WHO. WHO | Typhoid vaccines position paper. *WHO* (2008).  
46  
47 741 41. Thiem, V. D. *et al.* The Vi Conjugate Typhoid Vaccine Is Safe, Elicits  
48  
49 742 Protective Levels of IgG Anti-Vi, and Is Compatible with Routine Infant  
50  
51 743 Vaccines. *Clin. Vaccine Immunol.* **18**, 730–735 (2011).  
52  
53 744 42. Mohan, V. K. *et al.* Safety and Immunogenicity of a Vi Polysaccharide–  
54  
55 745 Tetanus Toxoid Conjugate Vaccine (Typbar-TCV) in Healthy Infants, Children,  
56  
57 746 and Adults in Typhoid Endemic Areas: A Multicenter, 2-Cohort, Open-Label,  
58  
59  
60

- 1  
2  
3 747 Double-Blind, Randomized Controlled Phase 3 Study. *Clin. Infect. Dis.* **61**,  
4 393–402 (2015).  
5 748  
6  
7 749 43. Mitra, M. *et al.* Efficacy and safety of vi-tetanus toxoid conjugated typhoid  
8 vaccine (PedaTyph™) in Indian children: School based cluster randomized  
9 750 study. *Hum. Vaccin. Immunother.* **12**, 939–945 (2016).  
10 751  
11  
12 752 44. Darton, T. C. *et al.* Using a Human Challenge Model of Infection to Measure  
13 Vaccine Efficacy: A Randomised, Controlled Trial Comparing the Typhoid  
14 753 Vaccines M01ZH09 with Placebo and Ty21a. *PLoS Negl. Trop. Dis.* **10**,  
15 754 e0004926 (2016).  
16 755  
17  
18 756 45. Azmatullah, A., Qamar, F. N., Thaver, D., Zaidi, A. K. & Bhutta, Z. A.  
19 757 Systematic review of the global epidemiology, clinical and laboratory profile of  
20 758 enteric fever. *J. Glob. Health* **5**, 20407 (2015).  
21 759  
22  
23 759 46. Feasey, N. A. *et al.* Three Epidemics of Invasive Multidrug-Resistant  
24 760 *Salmonella* Bloodstream Infection in Blantyre, Malawi, 1998–2014. *Clin. Infect.*  
25 761 *Dis.* **61**, S363–S371 (2015).  
26 762  
27  
28 762 47. Feasey, N. A. *et al.* Rapid Emergence of Multidrug Resistant, H58-Lineage  
29 763 *Salmonella* Typhi in Blantyre, Malawi. *PLoS Negl. Trop. Dis.* **9**, e0003748  
30 764 (2015).  
31 765  
32  
33 765 48. Saha, S. K. *et al.* Typhoid fever in Bangladesh: implications for vaccination  
34 766 policy. *Pediatr. Infect. Dis. J.* **20**, 521–4 (2001).  
35 767  
36  
37 767 49. Brooks, W. A. *et al.* Bacteremic Typhoid Fever in Children in an Urban Slum,  
38 768 Bangladesh. *Emerg. Infect. Dis.* **11**, 326–329 (2005).  
39 769  
40  
41 769 50. Khanam, F. *et al.* Typhoid fever in young children in Bangladesh: clinical  
42 770 findings, antibiotic susceptibility pattern and immune responses. *PLoS Negl.*  
43 771 *Trop. Dis.* **9**, e0003619 (2015).  
44 772  
45  
46 772 51. Choko, A. T. *et al.* The Uptake and Accuracy of Oral Kits for HIV Self-Testing  
47 773 in High HIV Prevalence Setting: A Cross-Sectional Feasibility Study in  
48 774 Blantyre, Malawi. *PLoS Med.* **8**, e1001102 (2011).  
49  
50  
51  
52  
53  
54  
55  
56  
57  
58  
59  
60

- 1  
2  
3 775 52. Gordon, M. A. *et al.* Epidemics of Invasive *Salmonella enterica* Serovar  
4 Enteritidis and *S. enterica* Serovar Typhimurium Infection Associated with  
5 776  
6 Multidrug Resistance among Adults and Children in Malawi. *Clin. Infect. Dis.*  
7 777  
8  
9 778 **46**, 963–969 (2008).  
10  
11 779 53. Pitzer, V. E. *et al.* Mathematical Modeling to Assess the Drivers of the Recent  
12 780  
13 Emergence of Typhoid Fever in Blantyre, Malawi. *Clin. Infect. Dis.* **61**, S251–  
14 781  
15 S258 (2015).  
16  
17 782 54. Karkey, A. *et al.* The Burden and Characteristics of Enteric Fever at a  
18 783  
19 Healthcare Facility in a Densely Populated Area of Kathmandu. *PLoS One* **5**,  
20 784  
21 e13988 (2010).  
22  
23 785 55. Pham Thanh, D. *et al.* A novel ciprofloxacin-resistant subclade of H58  
24 786  
25 *Salmonella* Typhi is associated with fluoroquinolone treatment failure. *Elife* **5**,  
26 787  
27 e14003 (2016).  
28  
29 788 56. Calderón, I. *et al.* Antibodies to porin antigens of *Salmonella typhi* induced  
30 789  
31 during typhoid infection in humans. *Infect. Immun.* **52**, 209–12 (1986).  
32  
33 790 57. Nolan, C. M. *et al.* Vi serology in the detection of typhoid carriers. *Lancet*  
34 791  
35 (*London, England*) **1**, 583–5 (1981).  
36  
37 792 58. Ferry, B. L. *et al.* Development of an anti-*Salmonella typhi* Vi ELISA:  
38 793  
39 assessment of immunocompetence in healthy donors. *Clin. Exp. Immunol.*  
40 794  
41 **136**, 297–303 (2004).  
42  
43 795 59. ODK. Open Data Kit. at <<https://opendatakit.org/>>  
44  
45 796 60. OpenClinica - Electronic data capture for clinical research. at  
46  
47 <<https://www.openclinica.com/>>  
48  
49  
50 798

1  
2  
3  
4  
5  
6  
7  
8  
9  
10  
11  
12  
13  
14  
15  
16  
17  
18  
19  
20  
21  
22  
23  
24  
25  
26  
27  
28  
29  
30  
31  
32  
33  
34  
35  
36  
37  
38  
39  
40  
41  
42  
43  
44  
45  
46  
47  
48  
49

799

For peer review only

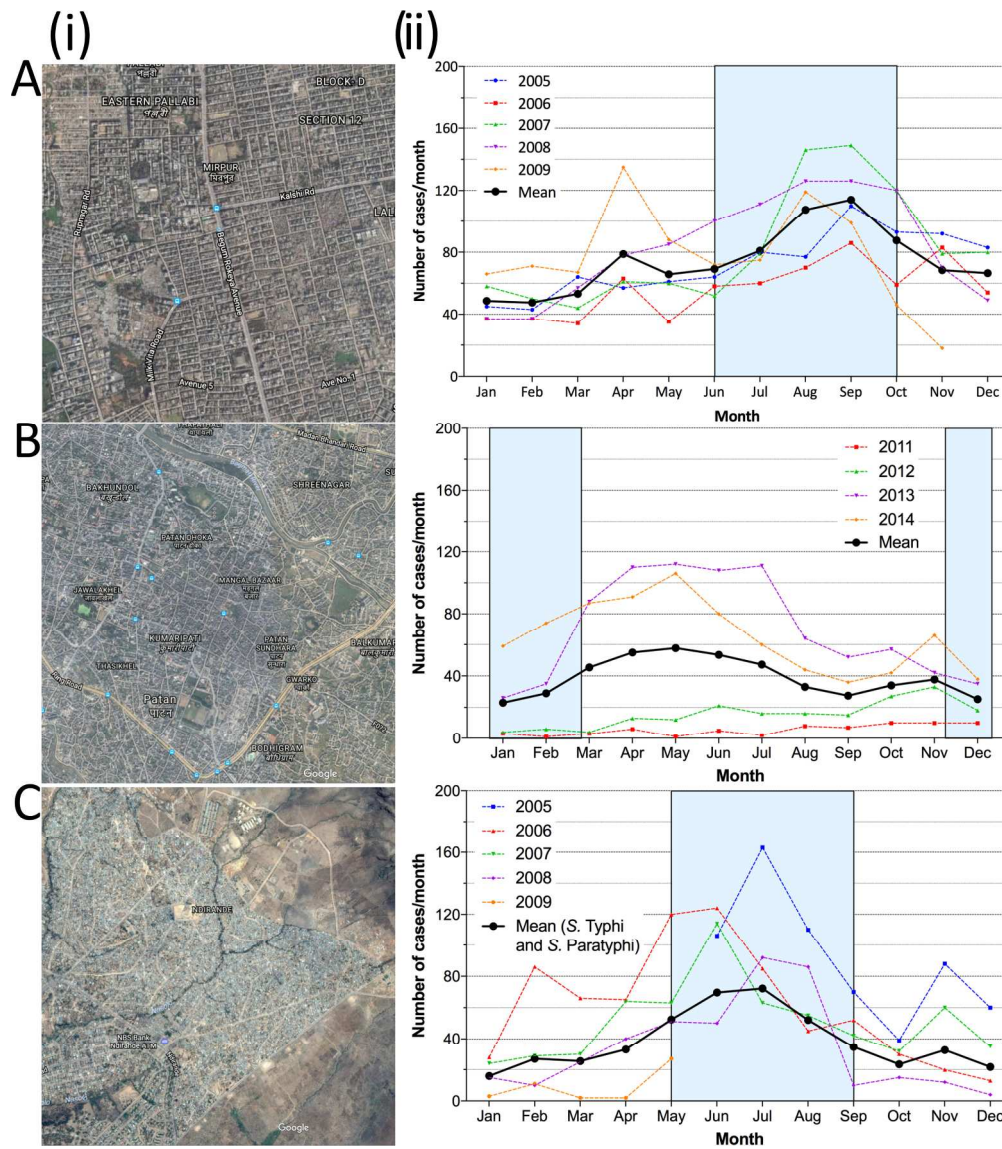

Figure 1. Description of STRATAA study field sites, demonstrating (i) the location of the three sampling sites in (A) Mirpur (Dhaka, Bangladesh), (B) Ndirande (Blantyre, Malawi) and (C) Patan (Kathmandu, Nepal), (ii) the historical number of typhoid cases detected per month at each site (blue box marks the annual monsoon season).

204x231mm (300 x 300 DPI)

Supplemental Table 1. Overview of STRATAA Study Procedures.

| Study component                            | CENSUS            |                |                |                |                |                |    | HEALTHCARE UTILISATION     |     | PASSIVE SURVEILLANCE      |       |   |    |                                   |   |   |                   | SEROSURVEY   |                |                                         |                 |   |   |
|--------------------------------------------|-------------------|----------------|----------------|----------------|----------------|----------------|----|----------------------------|-----|---------------------------|-------|---|----|-----------------------------------|---|---|-------------------|--------------|----------------|-----------------------------------------|-----------------|---|---|
|                                            |                   |                |                |                |                |                |    | Peak seasons during census |     | All cases                 |       |   |    | Household contacts of index cases |   |   |                   | Participants |                | Household contacts of possible carriers |                 |   |   |
|                                            |                   |                |                |                |                |                |    |                            |     | Cases within census area* |       |   |    |                                   |   |   |                   |              |                |                                         |                 |   |   |
| Sample size (individuals unless specified) | ≥100 000 per site |                |                |                |                |                |    | >700 households            |     | Convenience               |       |   |    | ≥73 households                    |   |   |                   | 8500         | 6800           | Members of ≥50 households               |                 |   |   |
| Time (months, unless specified)            | 0                 | 4              | 8              | 12             | 16             | 20             | 24 | 1st                        | 2nd | 0                         | Day 8 | 1 | ~6 | 12                                | 0 | 1 | ~3                | ~12          | 0              | **                                      | 3               | 6 |   |
| Consent                                    | X                 |                |                |                |                |                |    | X                          |     | X                         |       |   |    |                                   | X |   | X <sup>\$\$</sup> |              | X              |                                         |                 |   | x |
| Demographic Information                    | X                 | X <sup>#</sup> | X <sup>#</sup> | X <sup>#</sup> | X <sup>#</sup> | X <sup>#</sup> | X  |                            |     |                           |       |   |    |                                   |   |   |                   |              |                |                                         |                 |   |   |
| Clinical information                       |                   |                |                |                |                |                |    |                            |     | X                         | X     | X | X  | X                                 | X |   |                   |              |                |                                         |                 |   |   |
| Questionnaire                              |                   |                |                |                |                |                |    | X                          | X   |                           |       |   |    |                                   |   |   |                   |              |                |                                         |                 |   |   |
| Blood sample                               |                   |                |                |                |                |                |    |                            |     | X <sup>@</sup>            |       |   | X  |                                   | X |   | X <sup>\$</sup>   |              | X <sup>@</sup> |                                         |                 | X | X |
| Stool sample                               |                   |                |                |                |                |                |    |                            |     | X                         |       | X | X  | (X)                               | X | X | 2X <sup>€</sup>   | (3X)         |                |                                         | 2X <sup>€</sup> |   | X |
| Urine sample                               |                   |                |                |                |                |                |    |                            |     | X <sup>@</sup>            |       |   |    |                                   |   |   |                   |              | X <sup>@</sup> |                                         |                 |   |   |

**Supplemental Table 1. Overview of STRATAA Study Procedures.**

\* Case within census area = index if blood-culture confirmed typhoid diagnosis, resident in census area and household members consent to participation.

# Births, deaths and migrations updated every 4 months in Nepal & Bangladesh

~ approximately - dependent on timeframe of availability for the Vi ELISA result

\$ Host genetics collected/used for laboratory studies if either stool or serum positive or both

§ separate consent for host genetics

@ additional blood (RNA + plasma) and urine samples (subset of 100 with typhoid (culture positive), 100 with clinically suspected typhoid (culture negative), 100 with alternate bacteraemia; and 100 healthy controls (from the serosurvey) from adults 16-40yrs who give consent for genetic assays to be performed.

€ Participants identified as having high anti-Vi IgG only - 2 stool samples collected 48 hours apart once ELISA result known to identify/confirm carriage

\*\* When result known

Total blood volumes: **Passive survey** ≤16 mL adults (>16 years), ≤7 mL children (<16 years); **Serosurvey** ≤8 mL adults (>16 years), ≤7 mL children. Cell pellets stored for host genetics.
