# Supplementary material for: The STRATAA study protocol: a programme to assess the burden of enteric fever in Bangladesh, Malawi and Nepal using prospective population census, passive surveillance, serological studies and healthcare utilisation surveys
Source: PubMed Central journal article supplement (PMC5726077; doi:10.1136/bmjopen-2017-016283), 2017-07-02
Supplement: bmjopen-2017-016283supp001.pdf [file bmjopen-2017-016283supp001.pdf]

**Supplemental Table 1. Overview of STRATAA Study Procedures.**

| Study component                            | CENSUS            |                |                |                |                |                |    | HEALTHCARE UTILISATION     |                           | PASSIVE SURVEILLANCE |       |   |                                   |     |   |   |                   | SEROSURVEY |                                         |                 |   |   |
|--------------------------------------------|-------------------|----------------|----------------|----------------|----------------|----------------|----|----------------------------|---------------------------|----------------------|-------|---|-----------------------------------|-----|---|---|-------------------|------------|-----------------------------------------|-----------------|---|---|
|                                            |                   |                |                |                |                |                |    | Peak seasons during census | All cases                 |                      |       |   | Household contacts of index cases |     |   |   | Participants      |            | Household contacts of possible carriers |                 |   |   |
|                                            |                   |                |                |                |                |                |    |                            | Cases within census area* |                      |       |   |                                   |     |   |   |                   |            |                                         |                 |   |   |
| Sample size (individuals unless specified) | ≥100 000 per site |                |                |                |                |                |    | >700 households            | Convenience               |                      |       |   | ≥73 households                    |     |   |   | 8500              | 6800       | Members of ≥50 households               |                 |   |   |
| Time (months, unless specified)            | 0                 | 4              | 8              | 12             | 16             | 20             | 24 | 1st                        | 2nd                       | 0                    | Day 8 | 1 | ~6                                | 12  | 0 | 1 | ~3                | ~12        | 0                                       | **              | 3 | 6 |
| Consent                                    | X                 |                |                |                |                |                |    | X                          |                           | X                    |       |   |                                   |     | X |   | X <sup>\$\$</sup> |            | X                                       |                 |   | x |
| Demographic Information                    | X                 | X <sup>#</sup> | X <sup>#</sup> | X <sup>#</sup> | X <sup>#</sup> | X <sup>#</sup> | X  |                            |                           |                      |       |   |                                   |     |   |   |                   |            |                                         |                 |   |   |
| Clinical information                       |                   |                |                |                |                |                |    |                            |                           | X                    | X     | X | X                                 | X   | X |   |                   |            |                                         |                 |   |   |
| Questionnaire                              |                   |                |                |                |                |                |    | X                          | X                         |                      |       |   |                                   |     |   |   |                   |            |                                         |                 |   |   |
| Blood sample                               |                   |                |                |                |                |                |    |                            |                           | X <sup>@</sup>       |       |   | X                                 |     | X |   | X <sup>\$</sup>   |            | X <sup>@</sup>                          |                 | X | X |
| Stool sample                               |                   |                |                |                |                |                |    |                            |                           | X                    |       | X | X                                 | (X) | X | X | 2X <sup>€</sup>   | (3X)       |                                         | 2X <sup>€</sup> |   | X |
| Urine sample                               |                   |                |                |                |                |                |    |                            |                           | X <sup>@</sup>       |       |   |                                   |     |   |   |                   |            | X <sup>@</sup>                          |                 |   |   |

## Supplemental Table 1. Overview of STRATAA Study Procedures.

\* Case within census area = index if blood-culture confirmed typhoid diagnosis, resident in census area and household members consent to participation.

# Births, deaths and migrations updated every 4 months in Nepal & Bangladesh

~ approximately - dependent on timeframe of availability for the Vi ELISA result

\$ Host genetics collected/used for laboratory studies if either stool or serum positive or both

§ separate consent for host genetics

@ additional blood (RNA + plasma) and urine samples (subset of 100 with typhoid (culture positive), 100 with clinically suspected typhoid (culture negative), 100 with alternate bacteraemia; and 100 healthy controls (from the serosurvey) from adults 16-40yrs who give consent for genetic assays to be performed.

€ Participants identified as having high anti-Vi IgG only - 2 stool samples collected 48 hours apart once ELISA result known to identify/confirm carriage

\*\* When result known

Total blood volumes: **Passive survey** ≤16 mL adults (>16 years), ≤7 mL children (<16 years); **Serosurvey** ≤8 mL adults (>16 years), ≤7 mL children. Cell pellets stored for host genetics.
